# Supplementary material for: Recent progress on nanostructured carbon-based counter/back electrodes for high-performance dye-sensitized and perovskite solar cells
Source: Royal Society of Chemistry journal article supplement (doi:10.1039/d0nr04112b), 2020-01-01
Supplement: d0nr04112b1.pdf [file d0nr04112b1.pdf]

**Recent progress on nanostructured carbon-based counter/back electrodes  
for high-performance dye-sensitized and perovskite solar cells**

M. Aftabuzzaman<sup>†</sup>, Chunyuan Lu<sup>†</sup>, and Hwan Kyu Kim<sup>\*</sup>

*Global GET-Future Lab & Department of Advanced Materials Chemistry, Korea University,  
2511 Sejong-ro, Sejong 339–700, Korea, \*E-mail: hkk777@korea.ac.kr*

*<sup>†</sup>These authors made an equal contribution.*

*\*To whom correspondence should be addressed: Email: hkk777@korea.ac.kr*

**Abstract:** Dye-sensitized solar cells (DSSCs) and perovskite solar cells (PSCs) favor minimal environmental impact and low processing costs, factors that have prompted intensive research and development. In both cases, rare, expensive, and less stable metals (Pt and Au) are used as counter/back electrodes; this design increases the overall fabrication cost of commercial DSSC and PSC devices. Therefore, significant attempts have been made to identify possible substitutes. Carbon-based materials seem to be a favorable candidate for DSSCs and PSCs due to their excellent catalytic ability, easy scalability, low cost, and long-term stability. However, different carbon materials, including carbon black, graphene, and carbon nanotubes, among others, have distinct properties, which have a significant role in device efficiency. Herein, we summarize the recent advancement of carbon-based materials and review their synthetic approaches, structure-function relationship, surface modification, heteroatoms/metal/metal oxide incorporation, fabrication approaches, and effects on photovoltaic efficiency, based on previous studies. Finally, we highlight the advantages, disadvantages, and design criteria of carbon materials and fabrication challenges that inspire researchers to find low cost, efficient and stable counter/back electrodes for DSSCs and PSCs.

## 1. Introduction

Energy has become the key to achieving almost all sustainable development. Total energy consumption in 2018 was 13864.9 mtoe (million tonnes oil equivalent, 1 mtoe =  $4.1868 \times 10^6$  J), and by 2040, almost 815 quadrillion Btu (British thermal units, 1 Btu = 1055.06 J) energy will be needed.<sup>1,2</sup> To meet this ever-increasing demand for energy, fossil fuel depletion has accelerated and, considering the greenhouse effect and climate change, exploration and development of renewable energy resources have increased around the world. Among all of the renewable energy sources, solar energy is the world's most rapidly developing system.

46 Indeed, total solar production has grown by an average of 8.3% per year and has the abundant  
47 potential for power generation.<sup>1,3</sup> The overall solar energy received by the Earth's crust is  
48 roughly 3.8 million EJ per year, and the total global annual solar energy potential is 1,575  
49 (minimum) to 49,837 EJ (maximum) per year (**Fig. 1a**).<sup>4,5</sup> **Fig. 1b** shows the worldwide  
50 distribution of solar radiation; the small black dots indicate a theoretical area large enough to supply  
51 the entire world's energy demands (18 TW with solar power).

52 Third generation solar cells are often designated as evolving photovoltaic cells, including  
53 dye-sensitized solar cells (DSSCs), quantum dot solar cells, organic/polymer solar cells,  
54 perovskite solar cells (PSCs), etc. The majority of these designs are still in the research or  
55 development stage. **Fig. 1c** displays the efficiency progress of the best researched cells since  
56 1976. Notably, third generation solar cells favor minimal environmental impact and low  
57 processing costs, factors that have prompted intensive research and development.<sup>6–12</sup> DSSC  
58 energy conversion efficiency ( $\eta \approx 14.0\%$ ) is far below that of silicon solar cells ( $\eta \approx 26.1\%$ ).<sup>13–16</sup>  
59 However, due to DSSCs' simple assembly technique, transparency, good plasticity, mechanical  
60 robustness, environmental friendliness, and ability to work at wider angles, they are one of the  
61 highly promising alternatives to silicon solar cells.<sup>17,18</sup> Furthermore, their outstanding  
62 performance<sup>19</sup> ( $\eta \approx 34\%$ ) in indoor-light conditions compared to other solar cells makes them a  
63 possible candidate as a power source for indoor electronic devices and smart windows in building-  
64 integrated photovoltaics (BIPVs).<sup>20–22</sup> On the other hand, PSCs, which originate from DSSCs, have  
65 advanced from very low initial efficiency to show competitive efficiency with silicon solar cells in  
66 only a decade. Hence, PSCs are the fastest-advancing solar technology. Furthermore, due to  
67 low production cost, roll-to-roll processing ability, and flexibility, PSCs have become  
68 commercially attractive for photovoltaic technology.

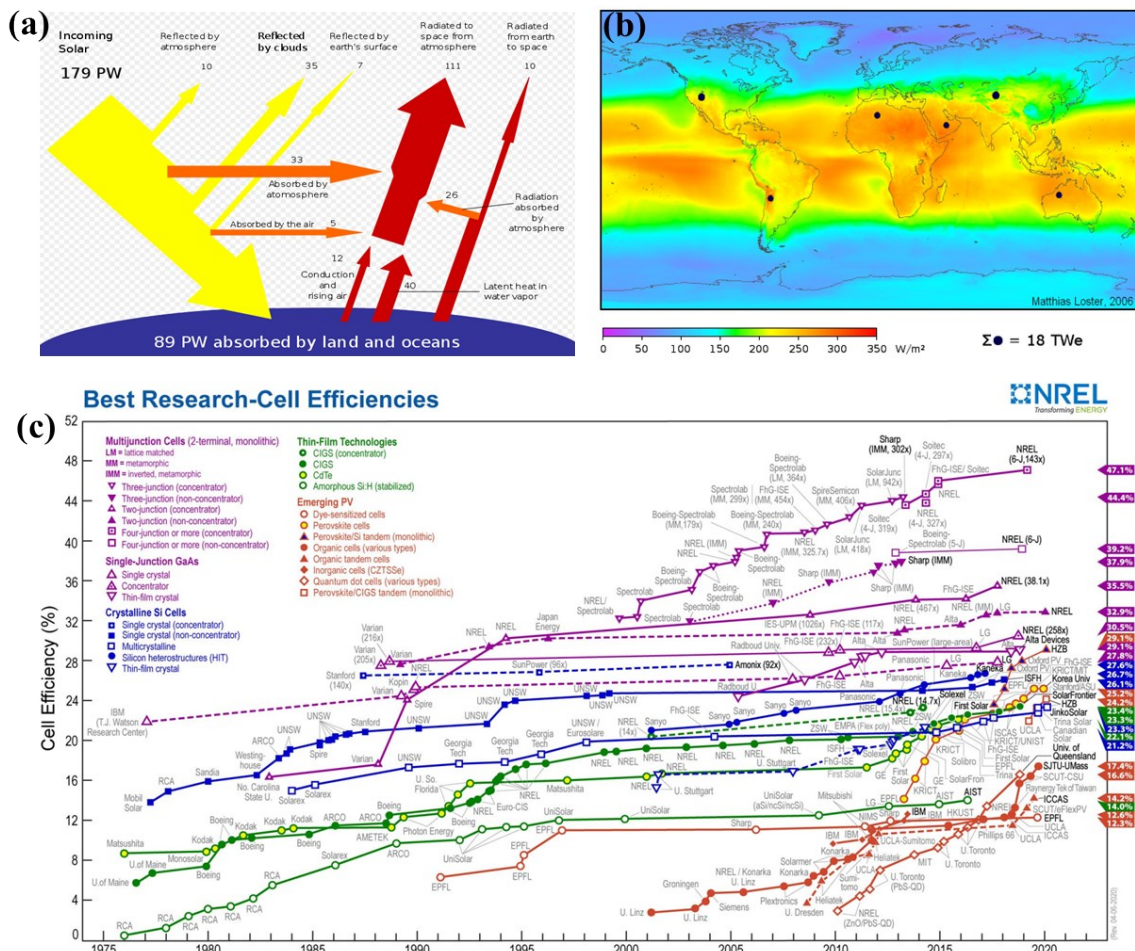

69

70 **Fig. 1** (a) Isolation of incoming solar radiation (photo credit: Frank van Mierlo).<sup>23</sup> (b) Worldwide  
 71 distribution of solar radiation; small black dots indicate theoretical areas large enough to supply  
 72 the entire world's energy demands (18 TW) with solar power<sup>24</sup> (photo credit: Matthias Loster). (c)  
 73 Top solar cell efficiencies by National Renewable Energy Laboratory (NREL).<sup>25</sup> Images reprinted  
 74 with permission (according to CC BY-SA 3.0).

75 Platinum (Pt) is a commonly used standard counter electrode (CE) in DSSCs due to its  
 76 high catalytic activity for redox shuttles and high conductivity. However, Pt is a costly and rare  
 77 noble metal, and thus it is not feasible for extensive use to industrialize DSSCs. Furthermore,  
 78 Pt makes complexes with electrolyte and has insufficient long-term stability in DSSCs.  
 79 Therefore, significant attempts have been made to find possible substitutes for an efficient, low  
 80 cost, and stable CE. Similar to DSSCs, the back electrode (BE) used in PSCs (silver [Au] and

gold [Ag]) are expensive and less stable, factors that increase the overall device fabrication cost and practical application of Au or Ag as the BE in commercial (or real) devices.

Carbon-based materials are favorable CE/BE candidates for DSSCs and PSCs due to their excellent catalytic ability, easy scalability, low cost, and long-term stability.<sup>26–30</sup> Furthermore, the carbon work function (WF) (5.0) is close to Au (5.1) and Ag (4.7); this criterion is critical for PSC BEs. Another advantage of carbon-based materials is its non-hydrophilic character: It stops moisture penetration in the perovskite layer, even with no sealing process.<sup>31</sup> In 1996, Kay and Grätzel first employed a graphite–carbon black (CB) mixture as the CE in a DSSC. Subsequently, many research attempts have explored different carbon materials, such as CB, graphite, mesoporous carbon, carbon nanotubes (CNTs), graphene, and carbon nanofibers (CNFs), all of which have been effectively utilized as CEs. However, the application of carbon-based materials as the BE in PSCs has not grown at the same rate as DSSCs; it remains in an emerging stage.

Some interesting reviews have discussed different CEs/BEs of DSSCs and PSCs.<sup>27–29,32,33</sup> However, in this review, we specially focus and discuss the different critical issues of carbon-based CEs/BEs. We discuss the source, structure-function relationship, and synthesis methods that greatly influence the performance of the materials. Finally, we highlight the advantages, disadvantages, design criteria of carbon materials, and fabrication challenges of a CE/BE that may lead researchers to identify low cost, efficient, and stable CEs/BEs for DSSCs and PSCs.

## **2. Dye-sensitized Solar Cells**

### **2.1. Working principle of DSSCs and the function of the CE**

In a conventional solar photovoltaic cell, when a sunlight photon hits the P-N junction, an electron-hole pair is generated in the depletion region. Due to the built-in potential and electric field in the depletion region, electrons move to the n-region and the holes move to the p-region.

105 When an external load is applied, electrons travel through the load and recombine with the  
106 holes to complete the circuit.

107 The working principle of DSSCs is not similar to a conventional solar cell; rather, it is  
108 similar to the natural photosynthesis process, where light absorption and charge carrier  
109 transportation are mediated by different substances. The overall process in a DSSC can be  
110 divided into four different fundamental steps: (i) photoexcitation of a sensitizer dye; (ii)  
111 injection of the electron into the conduction band of a semiconductor metal oxide from the  
112 excited dye and flow to the CE via an external circuit; (iii) reduction of an oxidized electrolyte  
113 at the CE interface; and (iv) regeneration of the dye by accepting electrons from the redox  
114 couple (**Fig. 2**). When a DSSC is exposed to light, the dye sensitizer is excited by absorbing a  
115 photon and an electron from a HOMO jump to LUMO. The excited electron is injected into  
116 the conduction band of the n-type semiconductor metal oxide film and diffuses to the anode.  
117 For efficient electron transfer between the excited dye and semiconductor metal oxide, the  
118 conduction band of the metal oxide should be lower than the LUMO level of the excited  
119 dye.<sup>18,34</sup> Typically, a layer of nanocrystalline titanium dioxide ( $TiO_2$ ) is used as a  
120 semiconductor electrode with a thickness ca. 10  $\mu m$ , particle size 10–30 nm and porosity of 50–  
121 60%.<sup>18</sup>

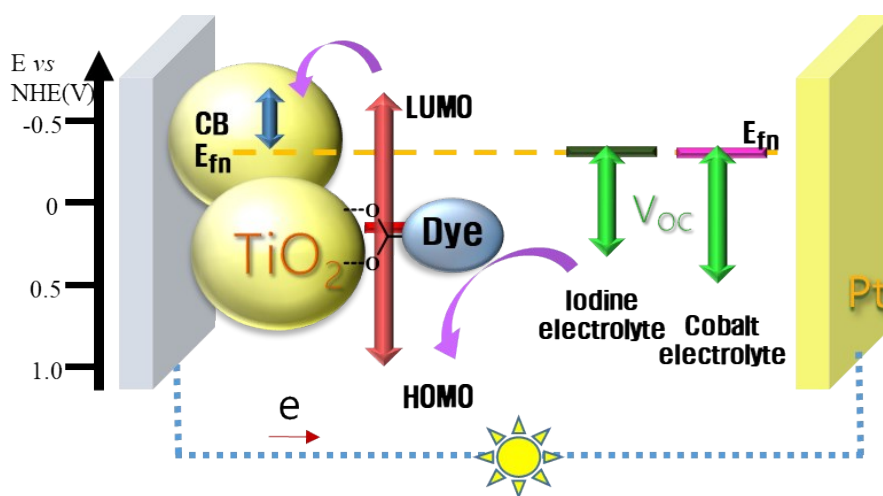

123 **Fig. 2** Schematic illustration of the working principle of dye-sensitized solar cells.

124 In DSSCs, the charge carriers face different types of resistance during the completion of  
125 the circuit, including series resistance ( $R_s$ ), the Warburg parameter ( $Z_W$ ), and charge transfer  
126 resistance ( $R_{ct}$ ).<sup>35–37</sup> Series resistance arises from the sheet resistance of transparent conductive  
127 oxide (TCO) glass and the contact resistance of the cell. The Warburg parameter describes the  
128 Nernst diffusion of the triiodide ion ( $I_3^-$ ) in the electrolyte. Charge transfer resistance results  
129 from the charge transfer at the photoanode/electrolyte and CE/electrolyte interface. In DSSCs,  
130 the charge transfer resistance at the CE/electrolyte interface often dominates over other charge  
131 transfer resistances, and thus  $R_{ct}$  often refers to charge transfer resistance at the CE/electrolyte  
132 interface. The CE in a DSSC executes three fundamental functions<sup>38–42</sup>: it collects electrons  
133 from the external circuit, reduces the oxidized redox couple as a catalyst, and finally—as a  
134 mirror—it reflects unabsorbed light from the cell back to the cell to enhance the utilization of  
135 sunlight. The CE substantially contributes to the photovoltaic properties of DSSCs. The output  
136 voltage of a DSSC after loading is lower than its theoretical maximum photovoltage or open-  
137 circuit voltage. This voltage loss is due to the charge transfer or mass transfer over-potential as  
138 well as the kinetic over-potential. The former originates from the electrocatalytic activity of  
139 the CE toward the mediator, whereas the latter results from the ionic conductivity of  
140 electrolytes and the transportation of mediator species from the CE to the photoanode.<sup>35,43</sup>  
141 Another important parameter, the fill factor (FF), depends on the aforementioned resistance  
142 values. Decreasing the overvoltage for diffusion and electron transfer and reducing the charge  
143 transfer resistance and series resistance will lead to a higher FF value, thus ensuring better  
144 efficiency and allowing the output power of the solar cell to approach its theoretical maximum.

145

## 146 2.2. Diverse carbon-based CEs for dye-sensitized solar cells

Carbon is the 15th most abundant element on Earth. Carbon atoms can bond with each other in diverse ways. There are eight carbon allotropes (**Fig. 3**): (i) diamond, (ii) graphite, (iii) lonsdaleite, (iv) fullerenes, namely C<sub>60</sub> (buckminsterfullerene or buckyball), C<sub>540</sub>, and C<sub>70</sub>, (vii) amorphous carbon, and (viii) CNTs (buckytube). Due to different intrinsic structures, allotropes show distinct physical and electrochemical properties. Several carbon-based materials, including CB, mesoporous carbon, graphite,<sup>79,45</sup> graphene,<sup>46,47</sup> CNTs, and CNFs, have been successfully employed as CEs in DSSCs. To enhance the catalytic ability of carbon, different heteroatoms (nitrogen [N], oxygen [O], sulfur [S], and phosphorus [P]) can be doped in the carbon network. Due to their different electronegativity, the heteroatom redistributes the spin and charge density of the carbon network and creates a highly efficient active site, where reactant molecules interact more competently.<sup>48,49</sup> Furthermore, different metals (Pt, iron [Fe], cobalt [Co] and palladium [Pd]), metal oxides (RuO<sub>2</sub>, Fe<sub>2</sub>O<sub>3</sub>, and NiO), alloy, and polymers can be incorporated into the carbon matrix: The synergetic effect of the component materials produces better catalytic performance.<sup>50–53</sup> Different defect positions or heteroatoms in the carbon substrate can be exploited as active sites for nucleation and growth of metal nanoparticles (NPs). These features can help stabilize the deposited metal NPs with a small size and narrow distribution.<sup>54</sup> Besides, the carbon substrate enhances the surface roughness and oxygen vacancies of metal NPs and metal oxides, factors that also improve the catalytic activity of carbon composites.

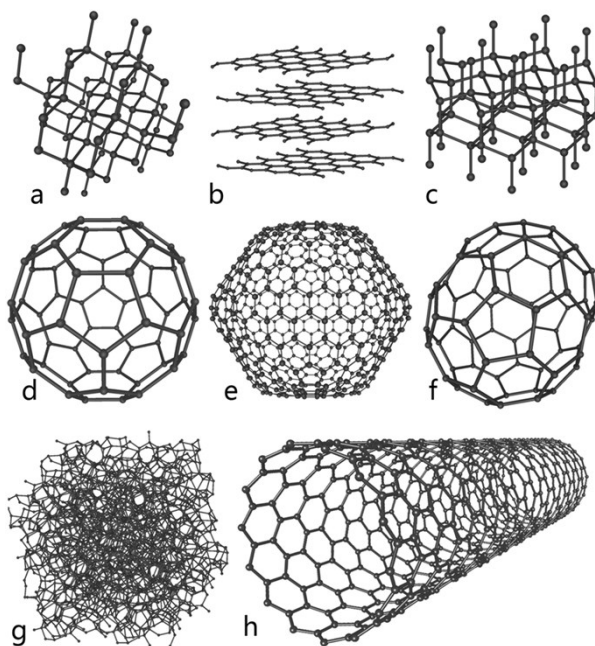

166

167 **Fig. 3.** Allotropes of carbon: (a) diamond, (b) graphite, (c) lonsdaleite, (d–f) fullerenes ( $C_{60}$ ,  $C_{540}$ ,  
 168  $C_{70}$ ), (g) amorphous carbon, and (h) carbon nanotube.<sup>55</sup> Copyright 2006, Wikipedia (reproduced  
 169 by CC BY-SA 3.0).

170

### 171 2.2.1. Carbon black and dense carbons for dye-sensitized solar cells

172 **Carbon black (CB)** is an amorphous form of carbon with finely divided particles; it is  
 173 generally obtained as soot from partial combustion of hydrocarbons. CB particles are spherical  
 174 and their size varies widely depending on the process by which they are made. The particles  
 175 are typically less regularly crystalline (paracrystalline). As a result of high surface-area-to-  
 176 volume ratio, excellent conductivity, and electrocatalytic activity, CB is a good material for a  
 177 CE.<sup>56,57</sup>

178 The electrocatalytic activity and charge transfer resistance of CB depend on the particle  
 179 size and its thickness on the fluorine-doped tin oxide (FTO) glass; these factors are crucial for  
 180 the function and performance of DSSCs. As CB thickness increases, the charge transfer  
 181 resistance of the CE drops. Above 14  $\mu\text{m}$ , the enormous surface area of the CB leads to a low

182  $R_{ct}$  of approximately  $2.96 \Omega \text{ cm}^2$  and enhances the DSSC's power conversion efficiency (PCE)  
183 to 9.1%.<sup>58</sup> Kim *et al.* varied the particle size from 20 to 90 nm and controlled electrode  
184 thickness from 1 to 9  $\mu\text{m}$  by adjusting the spraying time. They increased the surface-to-volume  
185 ratio by decreasing the CB particle size. These manipulations increase the electrocatalytic  
186 activity and conductivity of the CB electrode. Charge transfer resistance decreases as the  
187 electrolyte/electrode interface area increases.

188 The annealing temperature and composition of CB also play critical roles in the  
189 photovoltaic performance, especially when a binder is used in CE fabrication.<sup>59</sup> At a low  
190 temperature, excess binder materials leads to a high charge transfer resistance. The optimum  
191 temperature is above  $450^\circ\text{C}$ , at which point the binder particles are entirely eliminated.  
192 Consequently, the electrochemical properties of the resulting CB films become similar to those  
193 of Pt film.

194 Recently, Liu *et al.* studied the electrocatalytic activity of CB material in Co-based DSSCs  
195 (**Fig. 4a–f**).<sup>60</sup> They found that the amount of CB loading and the heat-treatment play equal key  
196 roles in the electrochemical behavior of the resulting a thin CB film. Notably, one CB layer  
197 without heat-treatment (denoted as CB-1) fully covers the FTO/glass substrate and is tightly  
198 bound by ethyl cellulose molecules. By contrast, a heat-treated CB layer (i.e., CB-1-H) is partly  
199 covered with aggregated CB clusters. The electrochemical studies revealed that heat-treated  
200 CB shows very high catalytic activity and low charge transfer resistance. This CB particle  
201 aggregation is evidently increased by augmenting the CB deposition layer (CB-3-H).  
202 Furthermore, catalytic activity is increased with an increased CB deposition layer.

203 To augment the CE performance, CB composites have been made with different  
204 materials, including polymer, graphene, and transition metals and their compounds.<sup>56,61–66</sup>  
205 Park's group developed a three-dimensional (3D) network epoxy polymer and CB composite,

206 acting as a catalytic layer and conductive corrosion protective layer (CCPL), by controlling the  
 207 CB weight percentage alongside the polymer (**Fig. 4g-j**).<sup>67</sup> The authors fabricated the  
 208 composite film by mixing cross-linkable epoxy monomers and polyamine hardener with CB;  
 209 they applied it by the spray pyrolysis technique. They used an efficient charge collector  
 210 stainless steel as the substrate. The CCPL (6 wt% of CB) is chemically stable in contact with  
 211 electrolytes and can inhibit the diffusion of electrolytes. These data indicate it is a remarkable  
 212 CCPL.

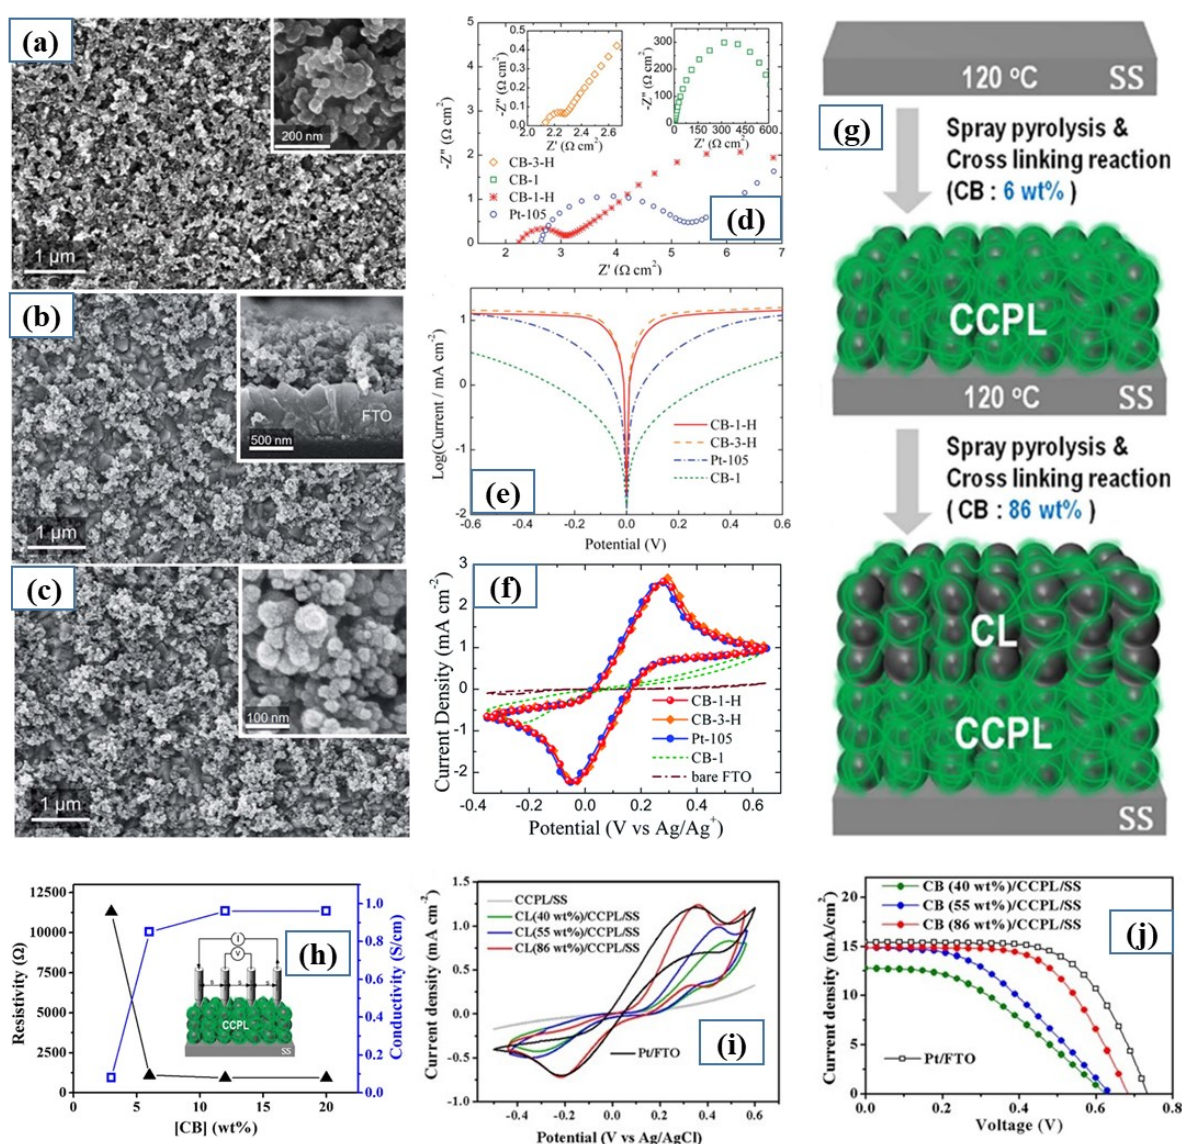

214 **Fig. 4.** Scanning electron microscopy (SEM) images of the (a) CB-1, (b) CB-1-H, and (c) CB-  
 215 3-H films (top-view; the insets display magnified and cross-sectional images of the

216 corresponding films, respectively). (d) Nyquist plots at 0 V, (e) Tafel polarization curves (10  
217  $\text{mV s}^{-1}$ ) of the corresponding symmetrical dummy cells, and (f) CV of various thin-film  
218 electrodes obtained at a scan rate of  $100 \text{ mV s}^{-1}$  in a three-electrode system. Copyright 2017,  
219 The Royal Society of Chemistry; reprinted with permission.<sup>60</sup> (g) Fabrication procedures of a  
220 SS counter electrode covering a composite of a three-dimensional (3D) network of polymers  
221 and the carbon black (CB). (h) The conductivity and resistivity as a function of the wt% CB.  
222 (i) CV curves using CL/CCPL/SS counter electrodes prepared with 40, 55, or 86% CB, and (j)  
223 J-V curves of the corresponding dye-sensitized solar cells. Copyright 2016, Nature Publishing  
224 Group; reprinted with permission.<sup>67</sup>

225

226 Wu's group used the spin-coating method to fabricate cheap and efficient counter CEs for  
227 DSSCs using Pt/CB composites.<sup>68</sup> To make the spin-coating procedure, they used ethyl  
228 cellulose (EC) as a binder to control the viscosity of the Pt/CB composites. At the Pt-to-CB  
229 ratio of approximately 1:3, the authors studied the influences of film composition (Pt/CB:EC  
230 = 30:15 or 30:4) and the number of coating layers of the Pt/CB electrodes on the  
231 electrochemical properties as well as the efficiency of the corresponding DSSCs. The analysis  
232 showed that a Pt/CB CE with a lower fraction of EC (Pt/CB:EC = 30:4) exhibits a low charge  
233 transfer resistance, high electrochemical activity, and good PCE (8.06%) comparable to that of  
234 cells using Pt. The detailed information of CB CEs and their electrocatalytic and photovoltaic  
235 properties in DSSCs are summarized in **Table 1**.

236 Different carbon-based materials with a low SSA also show very good catalytic activity  
237 due to their high surface catalytic activity. Different polymers and biomass have been used  
238 without any activating agent or template. Stucky *et al.* reported crystalline poly(triazine imide)-  
239 based graphitic carbon nitride (g-CN) which they prepared via a reformed ionothermal process

240 by using a melamine-cyanuric acid (MCA) complex as precursor.<sup>69</sup> Li *et al.* reported an active  
241 agent and template-free facile fabrication approach for the preparation of carbon nanosheets  
242 (CNSs) (**Fig. 5a–f**).<sup>70</sup> To fabricate CNSs, the authors mixed sodium citrate and urea, ground  
243 them, and annealed the mixture at various temperatures. At low-temperature solid-phase, cross-  
244 linking occurs, while at high-temperatures, carbonization occurs. There were annealing  
245 temperature-dependent electrochemical properties when applying CNSs as metal-free CEs for  
246 DSSCs. Yuan *et al.* reported a unique In<sub>2</sub>S<sub>3</sub>-C-Au hybrid, fabricated simply by decorating  
247 carbon-coated hierarchical In<sub>2</sub>S<sub>3</sub> flower-like architectures with Au particles (**Fig. 5g–i**).<sup>71</sup> The  
248 authors synthesized the In<sub>2</sub>S<sub>3</sub>-C-Au (ICA) hybrid materials by two-step hydrothermal  
249 treatment, using glucose and polyvinylpyrrolidone (PVP) as carbon sources. Electrochemical  
250 performance showed that the hybrid material contains high catalytic activity and  
251 electrochemical constancy for the interchange of the redox couple I<sub>3</sub><sup>-</sup>/I<sup>-</sup>. Moreover, the hybrid  
252 material as a CE exhibits a better PCE (8.91%) compared to the commercial Pt counterpart  
253 (7.67%).

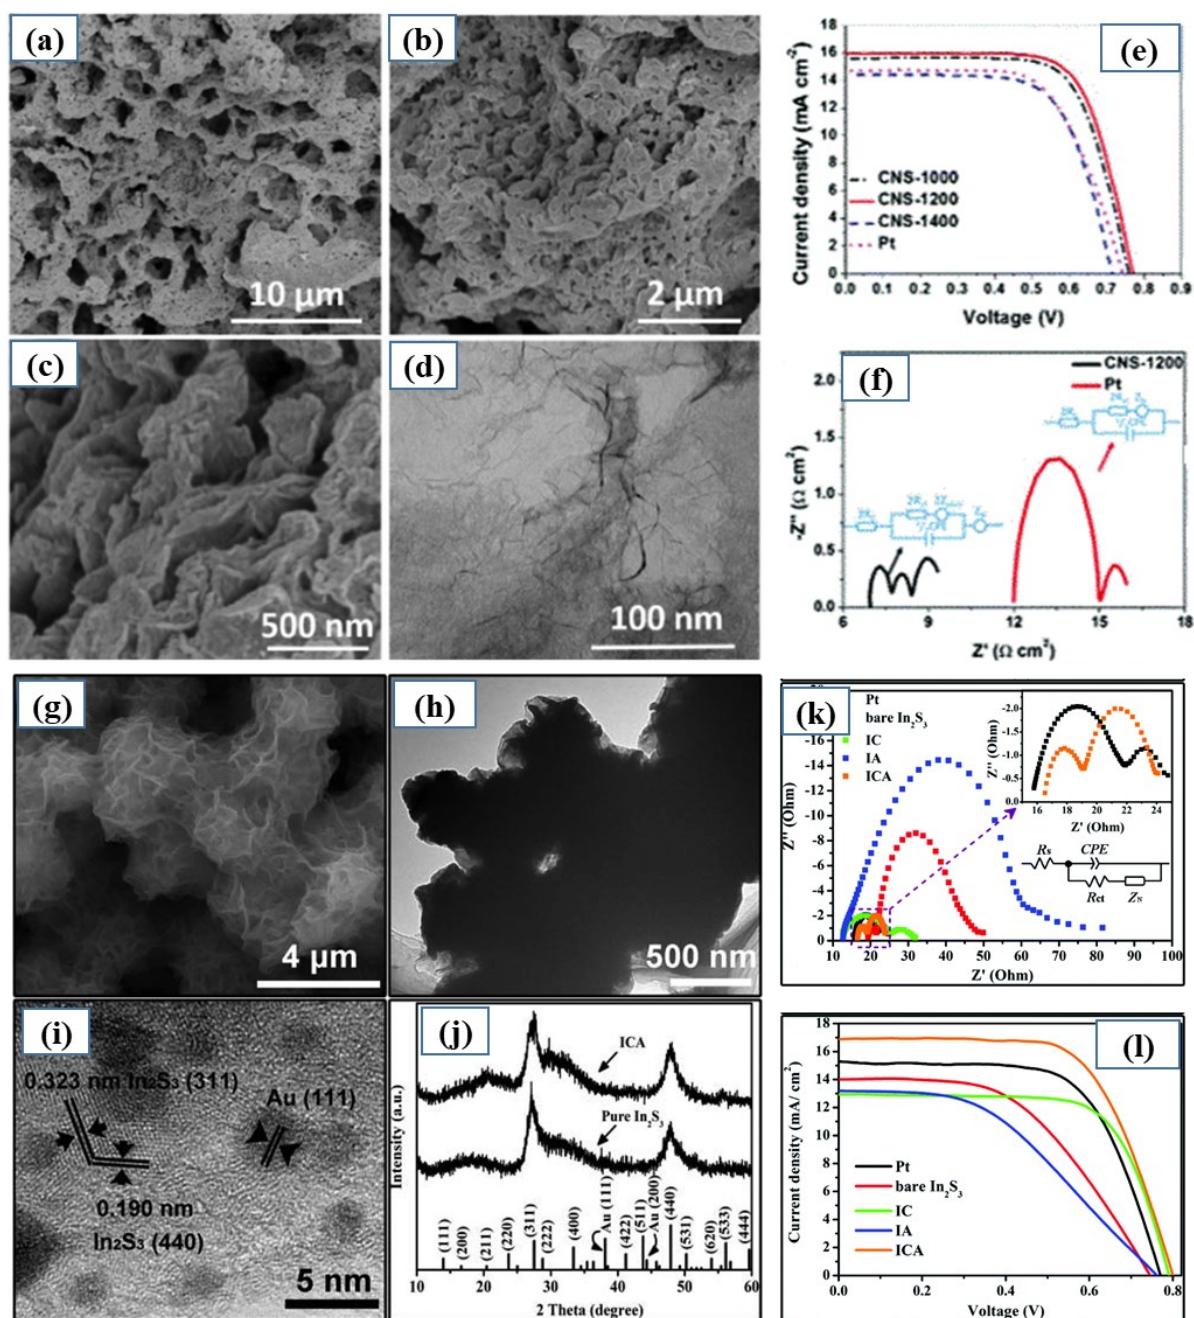

254

255 **Fig. 5** (a–c) Field emission scanning electron microscopy (FE-SEM) images of the generated  
 256 CNS-1200 at different magnifications. (d) A transmission electron microscopy (TEM) image  
 257 of the generated CNS-1200. (e) J-V curves of the cells with carbon nanotube sheets (CNS) at  
 258 different annealing temperatures compared to platinum (Pt). (f) Nyquist plots of the identical  
 259 CNS-1200 and Pt counter electrodes (CEs) at 0.8 V (inset: equivalent circuit). Copyright 2018,  
 260 The Royal Society of Chemistry; reprinted with permission.<sup>70</sup> (g) A SEM and (h and i)  
 261 transmission electron microscopy (TEM) image of In<sub>2</sub>S<sub>3</sub>–carbon–Au (ICA) hybrid at different

262 magnifications. (j) X-ray diffraction (XRD) spectra of  $\text{In}_2\text{S}_3$  (top) and  $\text{In}_2\text{S}_3$ -carbon-Au with a  
263 standard (bottom) of cubic  $\text{In}_2\text{S}_3$ , JCPDS 32-0456. (k) Nyquist plots of electrochemical  
264 impedance spectroscopy (EIS) spectra with an equivalent circuit (inset). (l) J-V curves of dye-  
265 sensitized solar cells for different electrodes. Copyright 2017, The Royal Society of Chemistry;  
266 reprinted with permission.<sup>71</sup>

267 Wang and Chen group's successfully planned and prepared a superlattice  
268 polyoxometalate/ $\text{MoS}_2$  heterojunction coated on the activated carbon surface by a facile step-  
269 by-step method. They used candle soot as carbon precursor.<sup>72</sup> This nanomaterial contains the  
270 synergetic benefits of the high conductivity of carbon NPs, admirable redox performance of  
271  $\text{P}_2\text{Mo}_{18}$ , and electrocatalytic activity of two-dimensional (2D)  $\text{MoS}_2$  with the structural  
272 advantages of a superlattice, heterojunction, high SSA, and hierarchical structure.  
273 Electrochemical properties specify that the  $\text{P}_2\text{Mo}_{18}/\text{MoS}_2@\text{C}$  nanomaterial has excellent  
274 electric conductivity for fast charge transformation, as well as outstanding catalytic activities  
275 for  $\text{I}_3^-$  reduction in DSSCs. Indeed, a DSSC that employs  $\text{P}_2\text{Mo}_{18}/\text{MoS}_2@\text{C}$  as a CE shows a  
276 PCE of 8.85%, which is higher than when using a Pt electrode. The details information of  
277 dense-carbon counter electrodes and their electrocatalytic and photovoltaic properties in  
278 DSSCs are summarized in **Table 2**.

279

280

281 **Table 1.** Carbon black (CB) counter electrodes and their electrocatalytic and photovoltaic properties in dye-sensitized solar cells.

| CE Materials                        | Substrate/coating technology  | Redox couple                    | Sensitizer | $R_s/R_{ct}$<br>( $\Omega \text{ cm}^2$ ) | $J_{sc}/V_{oc}/FF$<br>( $\text{mA cm}^{-2}/\text{V}/\%$ ) | $\eta^{\text{CE}}/\eta^{\text{Pt}}$<br>(%) | Ref. | Year |
|-------------------------------------|-------------------------------|---------------------------------|------------|-------------------------------------------|-----------------------------------------------------------|--------------------------------------------|------|------|
| CB                                  | FTO-g/doctor blading          | $\text{I}_3^-/\text{I}^-$       | N719       | -/0.66                                    | 15.00/0.78/71.3                                           | 8.35/8.29                                  | 59   | 2016 |
| CB                                  | FTO-g/spin coating            | $\text{I}_3^-/\text{I}^-$       | N719       | -/-                                       | 14.70/0.75/67.0                                           | 7.28/7.13                                  | 73   | 2016 |
| CB                                  | FTO-g/spin coating            | $\text{Co}^{3+}/\text{Co}^{2+}$ | Y123       | -/0.39                                    | 13.44/0.89/74.0                                           | 8.81/-                                     | 74   | 2017 |
| CB                                  | FTO-g/spin coating            | $\text{Co}^{3+}/\text{Co}^{2+}$ | Z907       | -/0.39                                    | 11.74/0.85/72.0                                           | 7.21/7.10                                  | 74   | 2017 |
| CB/CuO                              | FTO-g/doctor blading          | $\text{I}_3^-/\text{I}^-$       | N719       | -/-                                       | 15.94/0.77/65.0                                           | 8.05/6.96                                  | 75   | 2015 |
| CB/PT                               | Tinfoil/drop casting          | $\text{I}_3^-/\text{I}^-$       | N719       | 2.88/20.22                                | 17.21/0.76/69.0                                           | 9.02/8.36                                  | 62   | 2016 |
| CB- $\text{Fe}_3\text{O}_4$         | ITO-g/drop casting            | $\text{I}_3^-/\text{I}^-$       | N719       | 1.86/0.47                                 | 14.40/0.66/51.0                                           | 6.1/4.1                                    | 61   | 2016 |
| CB-g- $\text{C}_3\text{N}_4$        | FTO-g/doctor blading          | $\text{I}_3^-/\text{I}^-$       | N3         | -/2.4                                     | 13.21/0.69/56.0                                           | 5.09/5.45                                  | 76   | 2016 |
| CB/Epoxy polymer                    | Stainless steel/spray coating | $\text{I}_3^-/\text{I}^-$       | N719       | -/20.0                                    | 17.7/0.70/59.4                                            | 7.3/7.1                                    | 67   | 2016 |
| $\alpha\text{-MnO}_2/\text{CB}$     | FTO-g/doctor blading          | $\text{I}_3^-/\text{I}^-$       | N719       | -/-                                       | 11.41/0.66/57.0                                           | 4.29/4.24                                  | 64   | 2017 |
| CB/Pt                               | FTO-g/spin coating            | $\text{I}_3^-/\text{I}^-$       | N719       | -/1.44                                    | 14.76/0.77/70.3                                           | 7.99/8.17                                  | 63   | 2017 |
| $\text{NiCo}_2\text{O}_4/\text{CB}$ | FTO-g/doctor blading          | $\text{I}_3^-/\text{I}^-$       | N3         | -/-                                       | 16.08/0.65/65.0                                           | 6.27/7.38                                  | 77   | 2017 |
| CB/PAniNT                           | FTO-g/doctor blading          | $\text{I}_3^-/\text{I}^-$       | N719       | -/-                                       | 12.52/0.74/71.0                                           | 6.62/6.75                                  | 78   | 2018 |
| CB/PAniNT                           | FTO-g/doctor blading          | Polymer gel electrolyte         | N719       | -/-                                       | 9.11/0.74/71.0                                            | 4.82/6.75                                  | 78   | 2018 |
| CB- $\text{Si}_3\text{N}_4$         | FTO-g/screen-printed          | $\text{I}_3^-/\text{I}^-$       | N719       | -/0.85                                    | 15.91/0.74/79.1                                           | 8.34/8.50                                  | 79   | 2018 |
| N-CB@Pd                             | FTO-g/spin coating            | $\text{I}_3^-/\text{I}^-$       | N719       | 12.63/23.25*                              | 15.34/0.74/70.0                                           | 7.95/7.85                                  | 80   | 2019 |

282 Abbreviations: FTO-g, fluorine-doped tin oxide glass; ITO-g, indium tin oxide glass; SSA, specific surface area. \*Charge transfer unit is  $\Omega$

283

284

285

286

287 **Table 2.** Dense carbon counter electrodes (CEs) and their electrocatalytic and photovoltaic properties in dye-sensitized solar cells.

| CE material(s)                                                   | Precursor/SSA<br>(m <sup>2</sup> g <sup>-1</sup> ) | Substrate/coating<br>technology | Redox<br>couple                                    | Sensitizer  | $R_s/R_{ct}$<br>( $\Omega$ cm <sup>2</sup> ) | $J_{sc}/V_{oc}/FF$<br>(mA cm <sup>-2</sup> /V/%) | $\eta^{CE}/\eta^{Pt}$<br>(%) | Ref.      | Year        |
|------------------------------------------------------------------|----------------------------------------------------|---------------------------------|----------------------------------------------------|-------------|----------------------------------------------|--------------------------------------------------|------------------------------|-----------|-------------|
| Carbon                                                           | poly(triazine imide)/58                            | FTO-g/drop casting              | I <sub>3</sub> <sup>-</sup> /I <sup>-</sup>        | N719        | -/0.5                                        | 15.4/0.75/68.0                                   | 7.8/7.9                      | 69        | 2015        |
| Carbon                                                           | Urea, sodium citrate/-                             | FTO-g/doctor blading            | I <sub>3</sub> <sup>-</sup> /I <sup>-</sup>        | N719        | 3.48/0.35                                    | 15.94/0.77/71.03                                 | 8.71/7.24                    | 70        | 2018        |
| Carbon                                                           | Pomelo Peel/-                                      | FTO-g/spray coating             | I <sub>3</sub> <sup>-</sup> /I <sup>-</sup>        | N719        | 27.14/3.16*                                  | 14.65/0.81/67.0                                  | 7.81/8.24                    | 81        | 2019        |
| Carbon                                                           | Coconut shell/-                                    | FTO-g/pray coating              | I <sub>3</sub> <sup>-</sup> /I <sup>-</sup>        | N719        |                                              | 19.49/0.65/62.0                                  | 7.85/9.41                    | 82        | 2019        |
| Carbon/PANI                                                      | Citric acid/-                                      | FTO-g/spin coating              | I <sub>3</sub> <sup>-</sup> /I <sup>-</sup>        | N719        | 13.2/1.93                                    | 13.8/0.77/70.0                                   | 7.45/7.37                    | 83        | 2015        |
| PEDOT:PSS/Carbon cloth                                           | Commercial/-                                       | Directly                        | I <sub>3</sub> <sup>-</sup> /I <sup>-</sup>        | N719        | -/1.52                                       | 14.95/0.70/72.0                                  | 7.60/7.08                    | 84        | 2015        |
| s-PT/Carbon cloth                                                | Commercial/-                                       | Directly                        | I <sub>3</sub> <sup>-</sup> /I <sup>-</sup>        | N719        | -/1.08                                       | 15.90/0.71/75.0                                  | 8.45/7.08                    | 84        | 2015        |
| CoSe <sub>2</sub> /Carbon cloth                                  | Commercial                                         | FTO-g/-                         | I <sub>3</sub> <sup>-</sup> /I <sup>-</sup>        | N719        | 2.66/0.26                                    | 18.03/0.73/67.0                                  | 8.92/8.25                    | 85        | 2016        |
| CoS <sub>2</sub> /Carbon                                         | MOF & PVP/-                                        | FTO-g/spin coating              | I <sub>3</sub> <sup>-</sup> /I <sup>-</sup>        | N719        | 6.53/2.03*                                   | 16.9/0.73/66.0                                   | 8.20/7.88                    | 86        | 2016        |
| N-Carbon@FeCo                                                    | K <sub>4</sub> Fe(CN) <sub>6</sub> /3.84           | FTO-g/spin coating              | I <sub>3</sub> <sup>-</sup> /I <sup>-</sup>        | N719        | 4.38/1.02                                    | 17.59/0.76/67.0                                  | 8.87/8.28                    | 87        | 2016        |
| N-Carbon@FeNi <sub>3</sub>                                       | K <sub>4</sub> Fe(CN) <sub>6</sub> /9.52           | FTO-g/spin coating              | I <sub>3</sub> <sup>-</sup> /I <sup>-</sup>        | N719        | 4.71/ 1.23                                   | 16.58/0.77/65.0                                  | 8.26/8.28                    | 87        | 2016        |
| Sb <sub>2</sub> S <sub>3</sub> @Carbon                           | Commercial/-                                       | FTO-g/spin coating              | I <sub>3</sub> <sup>-</sup> /I <sup>-</sup>        | N719        | 6.7/10.3*                                    | 14.6/0.68/67.6                                   | 6.69/6.74                    | 88        | 2016        |
| Carbon/Pt                                                        | Bagasse/90.0                                       | FTO-g/spin coating              | I <sub>3</sub> <sup>-</sup> /I <sup>-</sup>        | N719        | 5.30/1.60                                    | 15.3/0.73/62.0                                   | 6.98/6.08                    | 89        | 2017        |
| In <sub>2</sub> S <sub>3</sub> -carbon-Au                        | Glucose/-                                          | FTO-g/doctor blading            | I <sub>3</sub> <sup>-</sup> /I <sup>-</sup>        | N719        | 5.51/-*                                      | 16.88/0.80/66.0                                  | 8.91/7.67                    | 71        | 2017        |
| Carbon/<br>Sn <sub>0.92</sub> Ta <sub>0.075</sub> O <sub>2</sub> | Glucose/119.7                                      | Ti foil/dip coating             | I <sub>3</sub> <sup>-</sup> /I <sup>-</sup>        | N3          | 9.0/2.1                                      | 16.53/0.70/0.72                                  | 8.38/8.46                    | 90        | 2017        |
| <b>CQDs-CoSe</b>                                                 | <b>Glucose/-</b>                                   | <b>FTO-g/-</b>                  | <b>I<sub>3</sub><sup>-</sup>/I<sup>-</sup></b>     | <b>N719</b> |                                              | <b>17.64/0.733/0.70</b>                          | <b>9.08/-</b>                | <b>91</b> | <b>2017</b> |
| Carbon@Fe <sub>3</sub> O <sub>4</sub>                            | Phenolic resin/93.8                                | Magnetic/spray coating          | Co <sup>3+</sup> /C<br>O <sub>2</sub> <sup>+</sup> | YD2-o-C8    | 6.32/4.60*                                   | 16.80/0.86/74.0                                  | 10.71/-                      | 92        | 2018        |
| Carbon-MoS <sub>2</sub>                                          | Commercial/-                                       | Graphite                        | I <sub>3</sub> <sup>-</sup> /I <sup>-</sup>        | N719        | 1.54/0.28*                                   | 15.58/725/68.34                                  | 7.72/6.74                    | 93        | 2018        |

| paper/drop casting                                        |                   |                         |                                             |      |            |                 |           |               |      |
|-----------------------------------------------------------|-------------------|-------------------------|---------------------------------------------|------|------------|-----------------|-----------|---------------|------|
| S-CQDs/CoSe                                               | Maltitol/-        | FTO-g/electrodeposition | I <sub>3</sub> <sup>-</sup> /I <sup>-</sup> | N719 | -/-        | 16.6/0.77/0.771 | 9.15/8.09 | <sup>94</sup> | 2018 |
| P <sub>2</sub> Mo <sub>18</sub> /MoS <sub>2</sub> @Carbon | Candle soot/174.2 | FTO-g/screen-printing   | I <sub>3</sub> <sup>-</sup> /I <sup>-</sup> | N719 | 5.78/1.44* | 18.81/0.77/61.0 | 8.80/7.37 | <sup>72</sup> | 2019 |
| Carbon-Ni                                                 | Humic acid/-      | FTO-g/doctor blading    | I <sub>3</sub> <sup>-</sup> /I <sup>-</sup> | N719 | 9.1/7.4    | 13.51/0.76/68.0 | 7.01/7.1  | <sup>95</sup> | 2020 |

288 Abbreviations: FTO-g, fluorine-doped tin oxide glass; PANI, polyaniline; PEDOT:PSS, poly(3,4-ethylenedioxythiophene) polystyrene sulfonate; SSA, specific surface area.

289 \*Charge transfer unit is  $\Omega$

290

291

292

### 293 2.2.2. Porous carbons for dye-sensitized solar cells

294 Porous carbon materials have received significant attention as CE for DSSCs owing to  
295 their unique characteristics, including ultra-high surface areas, large pore volumes, and tunable  
296 pore sizes and shapes. They also exhibit nanoscale effects in their pore channels and pore walls.  
297 High surface areas provide a large number of reaction or interaction sites for surface or  
298 interface-related processes, such as adsorption and catalysis. Moreover, mesoporous channels  
299 facilitate the transport of atoms, ions, and large molecules through the bulk of the material and  
300 assist to overcome charge transfer resistance.<sup>96–98</sup> Different methods and precursors have been  
301 used to synthesize mesoporous carbons; the efficiency of the mesoporous carbon electrodes  
302 depend on synthetic methods and precursors.<sup>85–94</sup>

303 Activated carbons, due to their high surface area, pore structure (essentially microporous),  
304 and high degree of surface reactivity, are widely used as catalysts. The primary raw material  
305 used for activated carbon is any organic material with a high carbon content, such as coconut  
306 shells, coal, peat wood, and polymers. Typically, physical (CO<sub>2</sub> or steam) or chemical (salts:  
307 ZnCl<sub>2</sub>, K<sub>2</sub>CO<sub>3</sub>, K<sub>2</sub>SO<sub>4</sub>,<sup>108,109</sup> strong bases: KOH, NaOH,<sup>110,111</sup> or acids: H<sub>2</sub>SO<sub>4</sub>, H<sub>3</sub>PO<sub>4</sub>)<sup>109,111</sup>  
308 activation methods are used to produce activated carbon. Transition metal chlorides, which  
309 decompose at low temperatures (below the carbonization temperature), may act as crystalline  
310 templates below the decomposition temperature, but at an elevated temperature, they act as  
311 activating agents. For example, ZnCl<sub>2</sub> is generally considered to be a dehydrating agent that  
312 eliminates water and induces aromatization and acts as a template below decomposition  
313 temperature to create micropores. However, at an elevated temperature, zinc chloride hydrates,  
314 which may form at low temperature, are converted to ZnO, which oxidizes carbon and creates  
315 mesopores as well as micropores, according to Equations (1) and (2).<sup>109,112–114</sup>

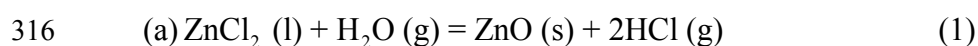

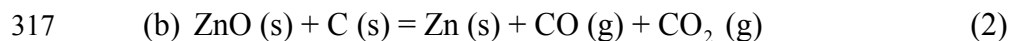

318

319 On the other hand, oxysalts, acids, and bases either oxidize lignocellulose or carbon itself  
 320 or decompose to form CO<sub>2</sub>, SO<sub>4</sub><sup>2-</sup>, NO<sub>3</sub><sup>-</sup>, or H<sub>2</sub>O (steam), among other compounds, which  
 321 oxidize lignocellulose or carbon and create pores, according to Equations (3-9).<sup>115,116</sup>  
 322 Furthermore, S-, N-, and P-containing activating agents may be incorporated heteroatoms in  
 323 the carbon network, as shown in **Fig. 6a**.<sup>112,117</sup>

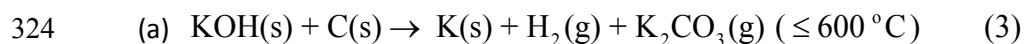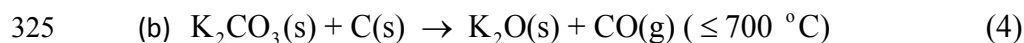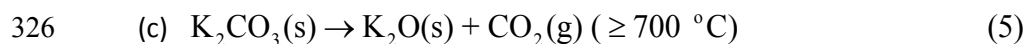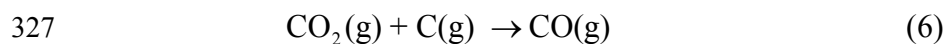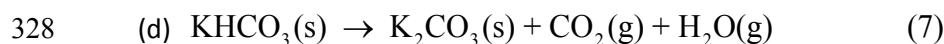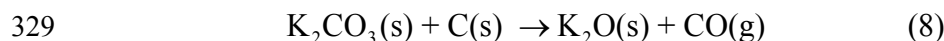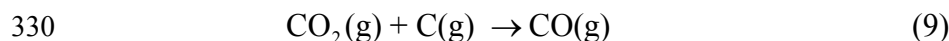

331 Activating agents and carbonization temperatures have significant effects on the  
 332 materials' surface morphology and performance. The carbonization temperature shows a  
 333 pyramidal effect on the efficiency of materials that contain heteroatoms. At low temperatures,  
 334 there is lower catalytic performance due to inferior graphitization, while at elevated  
 335 temperature, the fraction of heteroatoms decreases. Therefore, an optimized temperature is a  
 336 prerequisite. When researchers carbonized coffee waste (CW) carbonized with ZnCl<sub>2</sub> at  
 337 different temperatures, they found that the total surface area is higher for the prepared carbon  
 338 samples at a carbonization temperature 900°C, while the electrocatalytic performance is higher  
 339 for the carbon prepared at 800°C (**Fig. 6c–n**).<sup>118</sup> This phenomenon occurs because of the  
 340 decreasing percentage of pyridinic and pyrrolic nitrogen. Our group activated anchovy-derived  
 341 carbons (AnCs) with KOH, a strong activating agent; there is a higher SSA (2622 m<sup>2</sup> g<sup>-1</sup>) with

2.09 and 0.81 atom% N and S, respectively.<sup>119</sup> AnCs as CEs in DSSCs show superior electrocatalytic activity compared to Pt CE with a  $\text{Co}(\text{bpy})_3^{2+/3+}$  redox mediator. An AnC-based DSSC employing an SM-315 porphyrin sensitizer shows a PCE of 12.72%. To our knowledge, this is the highest reported value for DSSCs that utilize carbon nanomaterials as CEs.

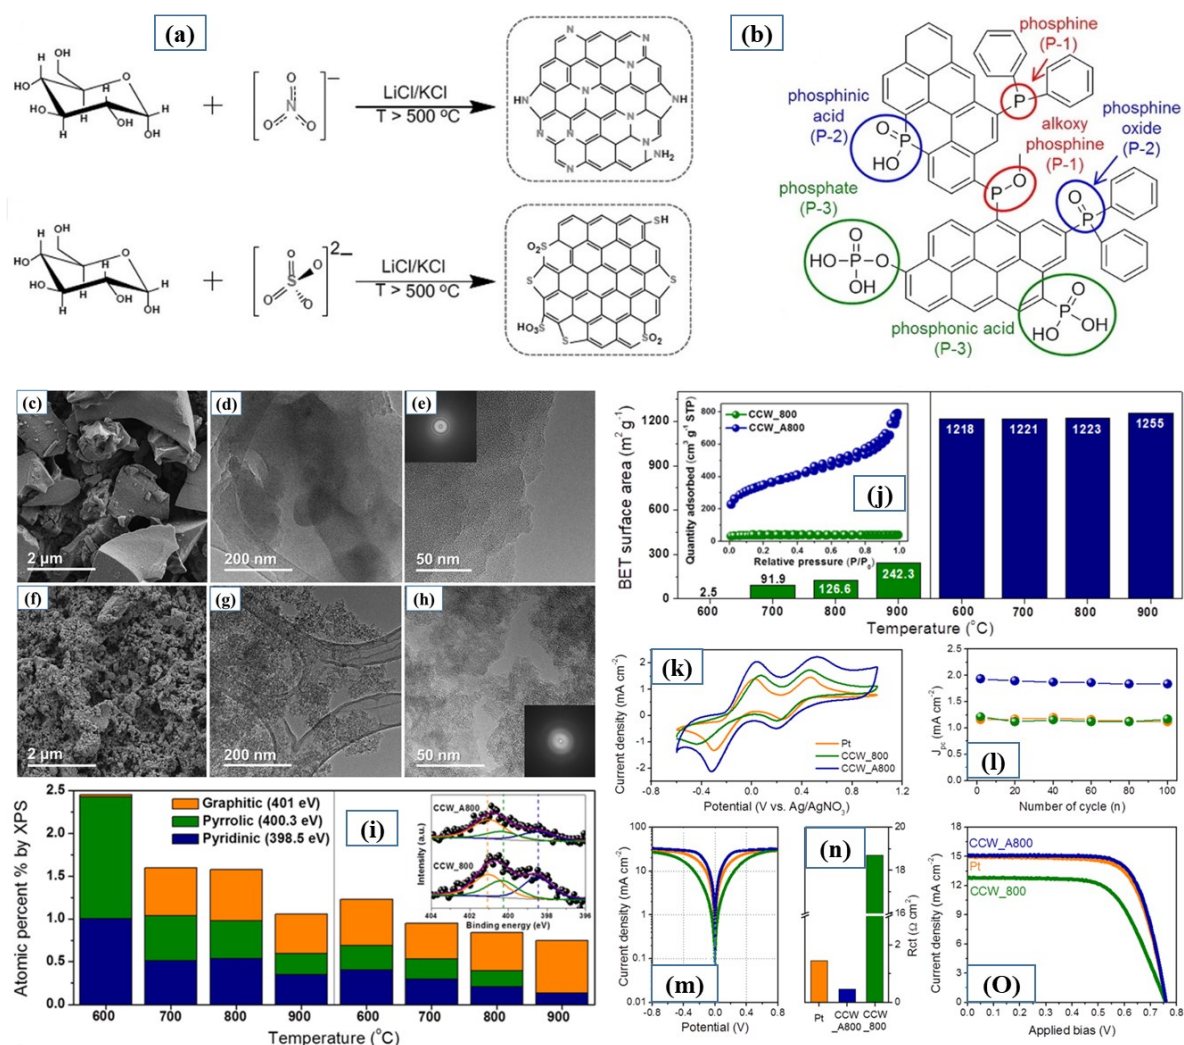

346

347

**Fig. 6.** (a) Development of N- and S-doped porous carbon sheets through the reaction of glucose and nitrate- ( $\text{NO}_3^-$ ) or sulfate- ( $\text{SO}_4^{2-}$ ) containing activating agents.<sup>117</sup> (b) Types of P-containing functional groups in the carbon matrix activated with  $\text{H}_3\text{PO}_4$ . Copyright 2013, WILEY-VCH; reprinted with permission.<sup>120</sup> (c) Scanning electron microscopy (SEM) and (d, e) transmission electron microscopy (TEM) images of CCW\_800; (f) SEM and (g, h) TEM

353 images of CCW\_A800 (insets of e and h correspond to fast Fourier transform (FFT) images).  
354 (i) N 1s X-ray photoelectron spectroscopy (XPS) deconvoluted results of different CCW  
355 samples (inset: N 1s XPS spectra of CCW\_800 and CCW\_A800). (j) Brunauer–Emmett–Teller  
356 (BET) surface area of different CCW samples (inset: N<sub>2</sub> adsorption/desorption isotherms of  
357 CCW\_800 and CCW\_A800). (k) CV spectra of CCW\_800, CCW\_A800, and Pt,  
358 corresponding to the (l) cathodic peak current density as a function of the CV cycle number.  
359 (m) Tafel polarization curves, (n) charge transfer resistance result based on electrochemical  
360 impedance spectroscopy (EIS) fitting, and (o) J–V performance curve of a dye-sensitized solar  
361 cells. Copyright 2017, The Royal Society of Chemistry; reprinted with permission.<sup>118</sup>

362

363 Wang *et al.* prepared activated N-doped porous carbons (a-NCs) by melamine-  
364 formaldehyde (MF) resin incorporation in the graphene and subsequent alkali activation and  
365 pyrolysis.<sup>121</sup> The graphene integration, mesopore-rich porous texture, and moderate N doping  
366 levels facilitate the applications of a-NCs as a CE in DSSCs. Wang *et al.* showed a simple and  
367 general way to prepared bio-based porous carbon (BPC) supported by a ZnNb<sub>2</sub>O<sub>6</sub> hybrid  
368 containing a distinctive network structure that provides an efficient way to increase electron  
369 transportation between the electrode/electrolyte interface, and higher PCE (**Fig. 7**).<sup>122</sup> As the  
370 raw materials, they used aloe peel waste, and by hydrothermal carbonization, KOH activation,  
371 and pyrolysis carbonization, they prepared a network BPC structure. Subsequently, they  
372 generated a dispersed solution of BPC in ethanol mixed with NbCl<sub>5</sub> and Zn(NO<sub>3</sub>)<sub>2</sub>·6H<sub>2</sub>O salts  
373 containing another ethanol solution. Next, they moved the mixed solution to a Teflon-coated  
374 stainless-steel autoclave. Finally, they conducted hydrothermal treatment at 240°C for 12 h and  
375 dried it under inert gas conditions. **Table 3** shows the details information of porous-carbon  
376 counter electrodes and their electrocatalytic and photovoltaic properties in DSSCs.

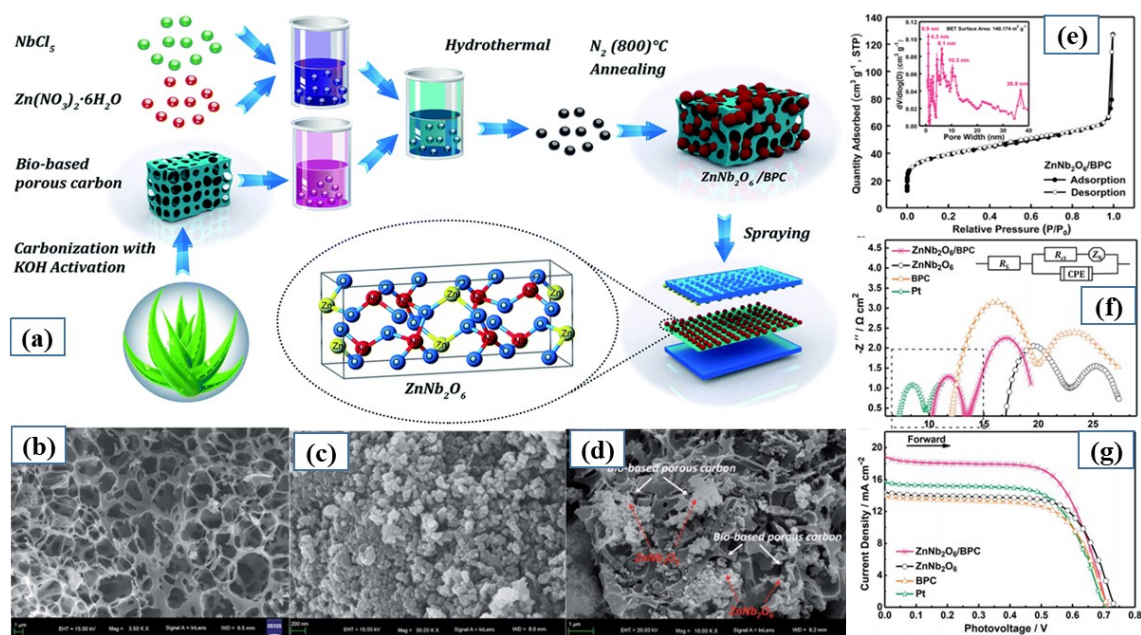

377

378 **Fig. 7** (a) Schematic design of the preparation of the ZnNb<sub>2</sub>O<sub>6</sub>/BPC nanomaterial. Field  
 379 emission scanning electron microscopy (FE-SEM) images of (b) BPC, (c) ZnNb<sub>2</sub>O<sub>6</sub>, and (d)  
 380 ZnNb<sub>2</sub>O<sub>6</sub>/BPC. (e) The N<sub>2</sub> adsorption/desorption isotherms of ZnNb<sub>2</sub>O<sub>6</sub>/BPC. (f) Nyquist plots of  
 381 the symmetrical cells, and (g) characteristic J-V curves of platinum (Pt), BPC, ZnNb<sub>2</sub>O<sub>6</sub>, and  
 382 ZnNb<sub>2</sub>O<sub>6</sub>/BPC under one sun illumination. Copyright 2017, The Royal Society of Chemistry;  
 383 reprinted with permission.<sup>122</sup>

384

385 **Table 3.** Activated carbon counter electrodes (CEs) and their electrocatalytic and photovoltaic properties in dye-sensitized solar cells.

| CE materials                      | Precursor/SSA<br>(m <sup>2</sup> g <sup>-1</sup> ) | Substrate/coating<br>technology | Redox<br>couple                             | Sensitizer | $R_s/R_{ct}$<br>( $\Omega$ cm <sup>2</sup> ) | $J_{sc}/V_{oc}/FF$<br>(mA cm <sup>-2</sup> /V/%) | $\eta^{CE}/\eta^{Pt}$<br>(%) | Ref. | Year |
|-----------------------------------|----------------------------------------------------|---------------------------------|---------------------------------------------|------------|----------------------------------------------|--------------------------------------------------|------------------------------|------|------|
| AC                                | Polypyrrole/707.98                                 | FTO-g/drop casting              | I <sub>3</sub> <sup>-</sup> /I <sup>-</sup> | N719       | -/4.08                                       | 14.37/0.73/62.0                                  | 6.54/6.87                    | 123  | 2016 |
| AC                                | Pine cone flower/1589                              | FTO-g/brush painting            | I <sub>3</sub> <sup>-</sup> /I <sup>-</sup> | N719       | -/-                                          | 13.51/0.71/51.62                                 | 4.98/6.25                    | 124  | 2017 |
| AC                                | PANI/2580.5                                        | FTO-g/spray coating             | I <sub>3</sub> <sup>-</sup> /I <sup>-</sup> | N719       | 17.1/2.2                                     | 15.85/0.702/63.0                                 | 7.01/7.25                    | 125  | 2017 |
| AC                                | Anchovy/2622                                       | FTO-g/spray coating             | Co <sup>3+</sup> /Co <sup>2+</sup>          | SM-315     | 3.00/7.56                                    | 18.78/0.89/75.88                                 | 12.72/12.23                  | 119  | 2017 |
| AC                                | Coffee waste/1200                                  | FTO-g/spray coating             | I <sub>3</sub> <sup>-</sup> /I <sup>-</sup> | N719       | 6.05/0.46                                    | 15.09/0.76/72.6                                  | 8.32/8.07                    | 118  | 2017 |
| AC                                | Fish scales/2933                                   | FTO-g/doctor blading            | I <sub>3</sub> <sup>-</sup> /I <sup>-</sup> | N3         | -/0.54                                       | 15.64/0.750/66.8                                 | 7.83/8.34                    | 126  | 2018 |
| AC                                | Quince leave/2196.6                                | FTO-g/brush painting            | I <sub>3</sub> <sup>-</sup> /I <sup>-</sup> | N719       | -/12.9*                                      | 14.99/0.70/52.59                                 | 5.52/6.56                    | 127  | 2018 |
| AC                                | Polypyrrole/636.27                                 | FTO-g/drop casting              | I <sub>3</sub> <sup>-</sup> /I <sup>-</sup> | N719       | -/2.59                                       | 13.62/724/64.0                                   | 6.29/6.80                    | 128  | 2019 |
| AC                                | Pomelo peel /1283.77                               | FTO-g/spray coating             | I <sub>3</sub> <sup>-</sup> /I <sup>-</sup> | N719       | 15.29/7.06                                   | 14.56/0.70/68.0                                  | 6.94/6.71                    | 129  | 2019 |
| AC                                | poly(para-phenylenediamine)/527                    | Carbon paper/brush painting     | I <sub>3</sub> <sup>-</sup> /I <sup>-</sup> | N719       | 11.23/2.32                                   | 12.64/762/63.77                                  | 6.14/6.63                    | 130  | 2020 |
| AC                                | Polypyrrole/1744.98                                | FTO-g/spray coating             | I <sub>3</sub> <sup>-</sup> /I <sup>-</sup> | N719       | -/1.1                                        | 16.82/0.74/66.0                                  | 8.21/8.61                    | 131  | 2018 |
| AC/Graphene                       | Melamine resin/1302.4                              | FTO-g/doctor blading            | I <sub>3</sub> <sup>-</sup> /I <sup>-</sup> | N719       | 15.65/3.75*                                  | 18.11/0.72/53.0                                  | 6.91/7.10                    | 132  | 2015 |
| AC/MWCNT                          | Commercial/735.31                                  | FTO-g/doctor blading            | Quasi-solid gel electrolyte                 | N719       | 5.4/0.6                                      | 15.9/0.714/74.2                                  | 8.42/8.11                    | 133  | 2017 |
| AC/CNT                            | Commercial/735.32                                  | Fabric/doctor blading           | Gel electrolyte                             | N719       | 15/0.77*                                     | 12.4/0.72/70.19                                  | 6.26/7.26                    | 134  | 2017 |
| AC/NiWO <sub>4</sub>              | Aloe peel/-                                        | FTO-g/spray coating             | I <sub>3</sub> <sup>-</sup> /I <sup>-</sup> | N719       | 5.65/1.08                                    | 14.70/0.70/69                                    | 7.08/6.46                    | 135  | 2019 |
| AC/CoWO <sub>4</sub>              | Aloe peel/-                                        | FTO-g/Spray coating             | I <sub>3</sub> <sup>-</sup> /I <sup>-</sup> | N719       | 7.22/4.03                                    | 13.96/0.69/63.0                                  | 6.07/6.46                    | 135  | 2019 |
| AC/FeWO <sub>4</sub>              | Aloe peel/-                                        | FTO-g/spray coating             | I <sub>3</sub> <sup>-</sup> /I <sup>-</sup> | N719       | 6.51/4.25                                    | 14.38/0.68/55.0                                  | 5.38/6.46                    | 135  | 2019 |
| V <sub>2</sub> O <sub>3</sub> @AC | Commercial/520.0                                   | FTO-g/spray coating             | I <sub>3</sub> <sup>-</sup> /I <sup>-</sup> | N719       | -/1.32*                                      | 11.38/0.733/67.0                                 | 5.55/4.54                    | 136  | 2019 |

|                                     |                  |                     |                                             |      |            |                 |           |                |      |
|-------------------------------------|------------------|---------------------|---------------------------------------------|------|------------|-----------------|-----------|----------------|------|
| AC/ZnNb <sub>2</sub> O <sub>6</sub> | Aloe peel/140.17 | FTO-g/spray coating | I <sub>3</sub> <sup>-</sup> /I <sup>-</sup> | N719 | 12.78/6.50 | 19.12/0.71/65.0 | 8.83/7.14 | <sup>122</sup> | 2019 |
| AC/FeTa <sub>2</sub> O <sub>6</sub> | Aloe peel/-      | FTO-g/spray coating | I <sub>3</sub> <sup>-</sup> /I <sup>-</sup> | N719 | 3.10/3.52  | 15.16/0.70/65.0 | 6.85/6.34 | <sup>137</sup> | 2019 |

386 Abbreviations: AC, activated carbon; CNT, carbon nanotubule; FTO-g, fluorine-doped tin oxide glass; MWCNT, multi-walled carbon nanotubules; PANI, polyaniline; SSA,

387 specific surface area. \*Charge transfer unit is  $\Omega$

388

389 Different template methods, including hard and soft templates, are generally used to  
390 produce mesopores or macropores alongside micropores in many carbon materials. In the hard  
391 template processes, carbon precursors are incorporated into the templates with well-defined  
392 structures. Subsequently, templates are removed by high-temperature, dissolution, or chemical  
393 etching, leaving behind the negative carbon replicas of the templates. Silica,<sup>138,139</sup> inert alkali  
394 metal chlorides (LiCl, NaCl, or KCl),<sup>112,140</sup> alkali earth metal oxides (MgO or CaO)<sup>141–143</sup>,  
395 sulfates (MgSO<sub>4</sub>),<sup>144</sup> and carbonates (CaCO<sub>3</sub>)<sup>145–147</sup> are used as hard templates.

396 Xiao *et al.* used an MgO-based hard template method to synthesize N-doped porous  
397 carbon (NPC) from the nitrogen-rich pitch (**Fig. 8a–i**).<sup>148</sup> The authors mechanically mixed N-  
398 rich pitch and MgO with a 1:6 mass ratio, followed by carbonization at 900°C. The porous  
399 carbon obtained at 900°C contains a high nitrogen content (7.11 wt.%) with high SSA and  
400 displays high electrocatalytic activity in the iodine reduction reaction. The generated NPC  
401 provides higher PCE (8.75%) compared to that of the commercial Pt CE (7.55%). Li *et al.* used  
402 basic magnesium sulfate (BMS) whiskers to fabricate dual-doped meso/microporous carbon as  
403 low-cost and efficient CEs for I<sub>3</sub><sup>-</sup> reduction.<sup>144</sup> Melamine is used as N-containing carbon source,  
404 while BMS whiskers are used as an S source and templates. This higher photovoltaic efficiency  
405 is due to the merits of well-balanced and fast charge transportation relating to facile ion transfer  
406 and fast electron conduction to the open framework structure and soft carbon nature of pitch-  
407 derived porous carbon, respectively.

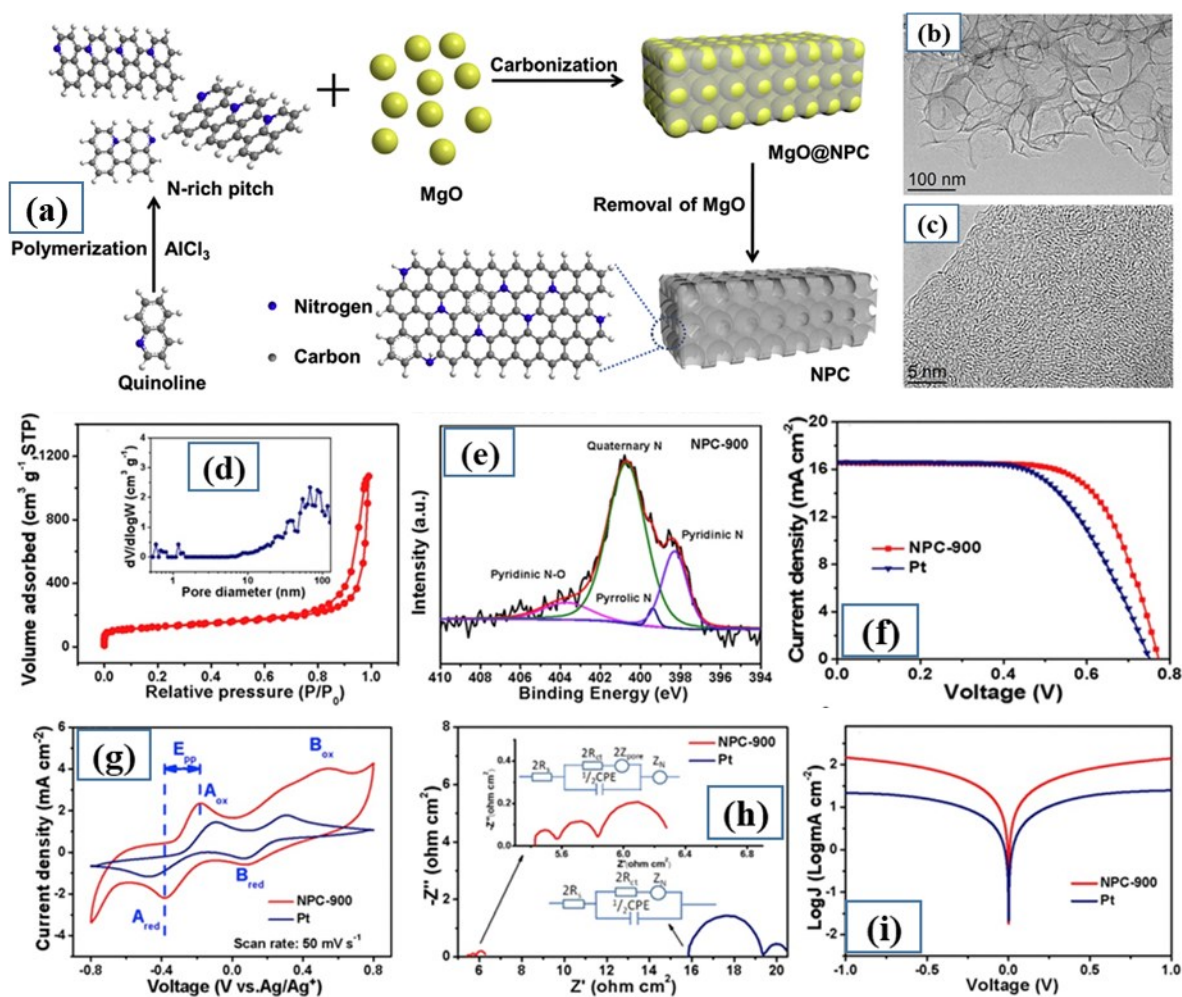

408

409 **Fig. 8.** (a) Schematic presentation of nitrogen-doped porous carbon (NPC) synthesis. (b, c)  
 410 High-resolution transmission electron microscopy (HR-TEM) images of NPC-900. (d)  $N_2$   
 411 adsorption and desorption isotherm (inset: the pore size distribution) and (e) high-resolution  
 412  $N1s$  X-ray photoelectron spectroscopy (XPS) spectrum of NPC-900. (f) J-V for dye-sensitized  
 413 solar cells (DSSCs) based on a NPC-900 or platinum (Pt) counter electrode (CE). (g) CV  
 414 curves, (h) Nyquist plots of the symmetrical dummy cells (inset: the magnified plots and  
 415 equivalent circuits), and (i) Tafel polarization curves of NPC-900 and Pt. Copyright 2018,  
 416 Elsevier; reprinted with permission.<sup>148</sup>

417

418 Unlike the hard template, soft templates do not possess a concrete shape. Soft templates  
419 are mainly block copolymers or organic molecules. In a liquid mixture, soft templates form  
420 micelles via self-assembly and act as the structure-directing agent. The hydrophilic tails of  
421 micelles then interact with the carbon precursor through covalent or hydrogen bonds. In this  
422 process, micelles are enclosed inside the carbon precursor. The enclosed micelles are then  
423 removed by heat treatment in an inert atmosphere above 400°C, creating hierarchically ordered  
424 mesopores inside the carbon. The shape of the pores depends on the shape of the micelles.<sup>149</sup>

425 Our group prepared copolymer-templated N-enriched nanocarbon (CTNC) and examined  
426 the performance with  $I^-/I_3^-$  and  $Co(bpy)_3^{2+/3+}$  redox mediators (**Fig. 9**).<sup>150</sup> This is also considered  
427 as a self-template or template-free method. We used polyacrylonitrile-*b*-poly(butyl acrylate)  
428 (PAN-*b*-PBA) block copolymer as a precursor, where the PAN fraction acts as a source of  
429 graphene-like structure and the PBA fraction acts as sacrificial block to create pores. CTNC  
430 shows greater catalytic activity towards the  $Co(bpy)_3^{2+/3+}$  reduction reaction and higher  
431 efficiency in comparison to the typical Pt CE. The experimental catalytic activity is due to the  
432 synergetic effect of the large surface area of CTNCs provided by a 3D bi-continuous structure  
433 and hierarchical pore connection. Furthermore, their distinctive electrical characteristics result  
434 from the existence of N heteroatoms situated on the edges of nano graphitic domains.

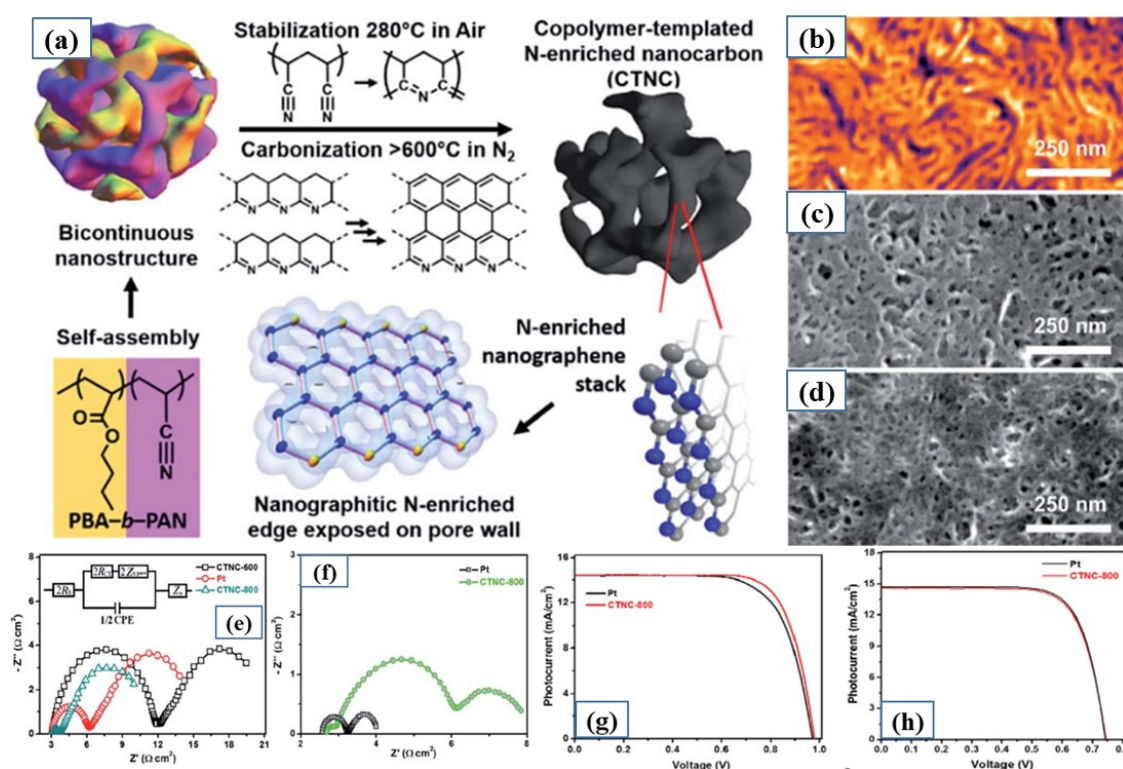

435

436 **Fig. 9.** (a) Schematic presentation of copolymer-templated nitrogen-enriched nanocarbon  
 437 (CTNC) preparation. (b) Atomic force microscopy (AFM) of PBA-*b*-PAN, displaying a bi-  
 438 continuous morphology. (c and d) Scanning electron microscopy (SEM) images of the thin-  
 439 film CTNC obtained at 400°C and 900°C, respectively. (e and f) Nyquist plots of symmetrical  
 440 dummy cells consisting of CTNC and platinum (Pt) counter electrodes (CEs) for Co(bpy)<sub>3</sub><sup>2+/3+</sup>  
 441 and I<sup>-</sup>/I<sub>3</sub><sup>-</sup> electrolytes, respectively (inset: the corresponding equivalent circuit). (g and h) J-V  
 442 curves of JK-306-based dye-sensitized solar cells with CTNC-800 and Pt CEs under one sun  
 443 illumination with Co(bpy)<sub>3</sub><sup>2+/3+</sup> and I<sup>-</sup>/I<sub>3</sub><sup>-</sup> based electrolytes. Copyright 2015, The Royal Society  
 444 of Chemistry; reprinted with permission.<sup>150</sup>

445

446 To enhance catalytic activity and stability, porous carbon with ordered graphitic layer  
 447 has been mixed with a polymer, transition metal, metalloid, or other nanocarbon materials like  
 448 graphene and CNTs to enhance the catalytic activity, wettability toward electrolytes, and long-  
 449 term stability.<sup>149,151–154</sup> Wang and Lin's group used a polystyrene sphere as a soft template to

450 prepare CoSe<sub>2</sub> NPs inserted into porous carbon shells (CoSe<sub>2</sub>/CS) as highly competent catalysts  
451 for the I<sub>3</sub><sup>-</sup> reduction reaction.<sup>155</sup> They covered the polystyrene sphere with polydopamine-  
452 containing Co precursor. After pyrolysis at 800°C, they removed the polystyrene sphere with  
453 CoO<sub>x</sub>/CS, which after calcination with Se powder at 450°C under an Ar atmosphere produces  
454 CoSe<sub>2</sub>/CS. The carbon nanoshells are highly graphitized with N doping, and CoSe<sub>2</sub> NPs are  
455 well distributed within the nanoshells. Our group recently doped tellurium (Te) and ruthenium  
456 (Ru) in the copolymer-templated N-enriched nanocarbon network via an *in situ*  
457 approach.<sup>52,156,157</sup> We found that after doping, the Te and Ru atom 3D carbon network retains  
458 its hierarchical graphene-like structure, including numerous defect sites and high porosity.  
459 Therefore, the generated Te- and Ru-doped CTNC shows better catalytic ability toward both  
460 iodine and cobalt redox couples. We obtained the highest efficiencies of 11.64 and 9.67% under  
461 one sun illumination for SGT-021/Co(bpy)<sub>3</sub><sup>2+/3+</sup>- and N719/I<sup>-</sup>/I<sub>3</sub><sup>-</sup>-based DSSCs with Te-doped  
462 CTNC CEs. These values are higher compared to using a Pt CE.

463 To enhance the synergetic effect of different elements, Chen *et al.* synthesized titanium,  
464 oxygen, phosphorus, and carbon-containing compositional material (TiOPC) as a CE  
465 competent in I<sub>3</sub><sup>-</sup>/I<sup>-</sup> redox couples (**Fig. 10**).<sup>158</sup> In this study, they obtained TiOPC  
466 nanocomposites from carbon thermal transformation of TiP<sub>2</sub>O<sub>7</sub> at a high temperature in inert  
467 conditions. Furthermore, they examined the catalytic performance of TiOPC by varying the  
468 carbon composition in the nanocomposites. They found that TiOPC with approximately 24.6  
469 wt% carbon enhances porosity and displays better electrocatalytic activity in the iodine  
470 reduction reaction, offering a photovoltaic performance of 8.65%. The energy conversion  
471 efficiency of TiOPC CE-based DSSCs is even greater than that of the typical Pt-based CE  
472 (6.66%). The superior catalytic activity of TiOPC is due to the existence of a leading  
473 Ti–O–P–C structure, besides the uninterrupted conductive carbon structure and higher

474 porosity. Detailed information about mesoporous carbon CEs and their electrocatalytic and  
 475 photovoltaic properties in DSSCs are summarized in **Table 4**.

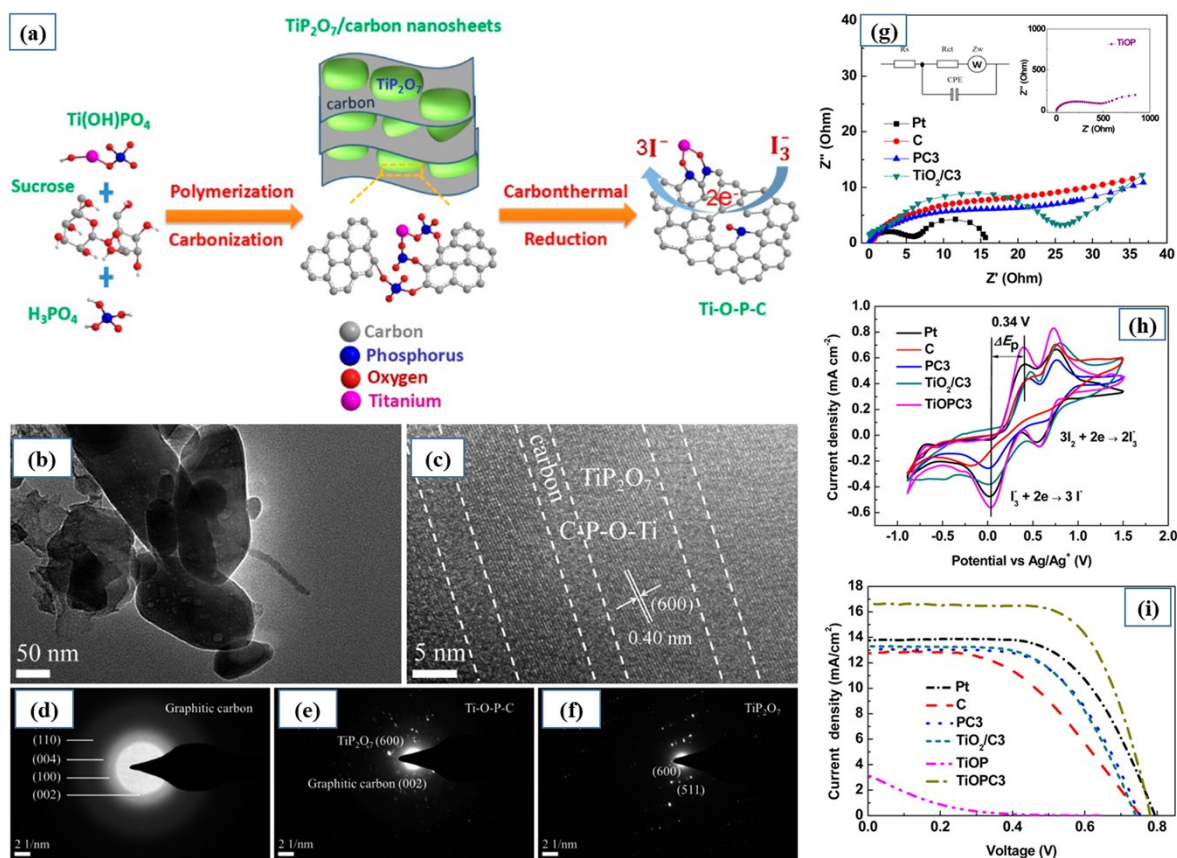

477 **Fig. 10.** (a) Schematic illustration of the synthesis of titanium, oxygen, phosphorus, and carbon  
 478 (TiOPC<sub>x</sub>) composites. (b, c) Transmission electron microscopy (TEM) images and (d-f)  
 479 selected area electron diffraction (SAED) patterns of the TiOPC<sub>3</sub> nanocomposite. (g) Nyquist  
 480 plots and (h) CV curves of different CEs. (i) J-V curves of dye-sensitized solar cells with  
 481 different CEs. Copyright 2016, American Chemical Society; reprinted with permission.<sup>158</sup>

482 **Table 4** Mesoporous carbon counter electrode (CE)s and their electrocatalytic and photovoltaic properties in dye-sensitized solar cells.

| CE material(s)          | Precursor/SSA<br>(m <sup>2</sup> g <sup>-1</sup> )                      | Substrate/coating<br>technology | Redox<br>couple                             | Sensitizer | $R_s/R_{ct}$<br>( $\Omega$ cm <sup>2</sup> ) | $J_{sc}/V_{oc}/FF$<br>(mA cm <sup>-2</sup> /V/%) | $\eta^{CE}/\eta^{Pt}$<br>(%) | Ref.           | Year |
|-------------------------|-------------------------------------------------------------------------|---------------------------------|---------------------------------------------|------------|----------------------------------------------|--------------------------------------------------|------------------------------|----------------|------|
| N-doped porous carbon   | Resorcinol & cyanamide/728.0                                            | FTO-g/doctor blading            | I <sub>3</sub> <sup>-</sup> /I <sup>-</sup> | N719       | -/-                                          | 13.75/0.79/67.2                                  | 7.27/6.92                    | <sup>138</sup> | 2015 |
| S-doped porous carbon   | Pitch/649.0                                                             | FTO-g/spray coating             | I <sub>3</sub> <sup>-</sup> /I <sup>-</sup> | N719       | 6.45/1.99*                                   | 14.98/0.70/67.0                                  | 6.97/7.28                    | <sup>159</sup> | 2015 |
| N-doped porous carbon   | PBA- <i>b</i> -PAN/485.0                                                | FTO-g/spray coating             | Co <sup>3+</sup> /Co <sup>2+</sup>          | SM-315     | 1.55/0.31                                    | 14.57/0.97/73.5                                  | 10.32/9.80                   | <sup>160</sup> | 2015 |
| N-doped porous carbon   | PBA- <i>b</i> -PAN/485.0                                                | FTO-g/spray coating             | I <sub>3</sub> <sup>-</sup> /I <sup>-</sup> | N719       | -/-                                          | 14.58/0.74/72.9                                  | 7.88/8.11                    | <sup>160</sup> | 2015 |
| Porous carbon           | Eggshell membranes/401.0                                                | FTO-g/doctor blading            | I <sub>3</sub> <sup>-</sup> /I <sup>-</sup> | N719       | 5.77/1.22                                    | 13.40/0.79/63.                                   | 6.71/6.63                    | <sup>161</sup> | 2015 |
| N-doped porous carbon   | Resorcinol/246.3                                                        | FTO-g/doctor blading            | I <sub>3</sub> <sup>-</sup> /I <sup>-</sup> | N3         | -/0.77                                       | 15.19/0.71/66.0                                  | 7.09/7.31                    | <sup>162</sup> | 2015 |
| Porous carbon           | CMS/301.4                                                               | FTO-g/spray coating             | Co <sup>3+</sup> /Co <sup>2+</sup>          | YD2-o-C8   | 11.96/2.44                                   | 15.24/0.84/68.0                                  | 8.73/ 9.41                   | <sup>163</sup> | 2016 |
| Porous carbon           | MOF/813.9                                                               | -/-                             | I <sub>3</sub> <sup>-</sup> /I <sup>-</sup> | N719       | 7.43/8.54*                                   | 13.56/0.77/68.0                                  | 7.32/7.53                    | <sup>164</sup> | 2016 |
| N/S-doped porous carbon | PVA & melamine/814                                                      | FTO-g/spray coating             | I <sub>3</sub> <sup>-</sup> /I <sup>-</sup> | N719       | 6.43/1.85                                    | 14.42/0.73/70.6                                  | 7.41/ 7.14                   | <sup>144</sup> | 2016 |
| Co@Porous carbon        | MOF/231.0                                                               | FTO-g/spray coating             | I <sub>3</sub> <sup>-</sup> /I <sup>-</sup> | N719       | -/-                                          | 13.29/0.80/ 74.0                                 | 7.92/ 8.18                   | <sup>165</sup> | 2016 |
| Porous carbon           | Resorcinol/454.47                                                       | FTO-g/spray coating             | I <sub>3</sub> <sup>-</sup> /I <sup>-</sup> | N719       | 6.14/1.22                                    | 14.82/0.78/58.0                                  | 6.71/7.88                    | <sup>166</sup> | 2016 |
| Porous carbon           | Polystyrene & resorcinol/-                                              | FTO-g/spray coating             | Co <sup>3+</sup> /Co <sup>2+</sup>          | YD2-o-C8   | 5.63/0.37                                    | 16.90/0.86/73.0                                  | 10.61/9.41                   | <sup>166</sup> | 2016 |
| Porous carbon           | Tetraaminobenzene tetrahydrochloride & benzene tricarboxylic acid/406.0 | FTO-g/spray coating             | Co <sup>3+</sup> /Co <sup>2+</sup>          | SGT-129    | 1.33/ 0.51                                   | 16.30/0.84/71.9                                  | 9.82/9.28                    | <sup>167</sup> | 2017 |
| Porous carbon           | Resorcinol/431.4                                                        | Ti-oil/spray coating            | Co <sup>3+</sup> /Co <sup>2+</sup>          | YD2-o-C8   | 4.08/1.06                                    | 15.71/0.84/68.8                                  | 9.10/-                       | <sup>168</sup> | 2017 |
| N-doped porous carbon   | Pitch/407.0                                                             | FTO-g/dip coating               | I <sub>3</sub> <sup>-</sup> /I <sup>-</sup> | N719       | 2.71/0.14                                    | 16.54/0.77/69.0                                  | 8.75/7.55                    | <sup>169</sup> | 2018 |
| Porous carbon           | Pomelo peel/154.0                                                       | FTO-g/spray coating             | I <sub>3</sub> <sup>-</sup> /I <sup>-</sup> | N719       | 12.76/1.02*                                  | 16.24/0.79/65.0                                  | 8.29/8.24                    | <sup>170</sup> | 2018 |

|                                  |                           |                       |                                    |          |             |                 |                 |                |      |
|----------------------------------|---------------------------|-----------------------|------------------------------------|----------|-------------|-----------------|-----------------|----------------|------|
| N-doped porous carbon            | PpPD/657                  | FTO-g/doctor blading  | I <sub>3</sub> /I <sup>-</sup>     | N719     | 5.6/-       | 16.08/0.75/0.74 | 8.90/8.09       | <sup>171</sup> | 2018 |
| Porous carbon                    | Resorcinol/724.0          | FTO-g/doctor blading  | I <sub>3</sub> /I <sup>-</sup>     | N719     | 11.06/3.96  | 16.59/0.77/71.0 | 9.08/7.92       | <sup>172</sup> | 2019 |
| Graphene/Porous carbon           | Resorcinol/485.0          | FTO-g/doctor blading  | I <sub>3</sub> /I <sup>-</sup>     | N719     | 15.58/8.47* | 15.13/0.73/61.0 | 6.82/7.08       | <sup>153</sup> | 2015 |
| TiOP/Porous carbon               | Sucrose/227.0             | FTO-g/doctor blading  | I <sub>3</sub> /I <sup>-</sup>     | N719     | 0.15/0.17   | 16.64/0.78/67.0 | 8.65/6.66       | <sup>158</sup> | 2016 |
| W <sub>2</sub> C/Porous carbon   | Resorcinol/327.3          | ITO-PEN/spray coating | I <sub>3</sub> /I <sup>-</sup>     | N719     | -/-         | 15.23/0.74/67.2 | 7.61/-          | <sup>151</sup> | 2016 |
| VC/Porous carbon                 | Resorcinol/436.82         | ITO-PEN/spray coating | Co <sup>3+</sup> /Co <sup>2+</sup> | YD2-o-C8 | 15.5/0.48   | 15.86/0.84/73.2 | 9.75/8.18       | <sup>173</sup> | 2016 |
| CoNi/Porous carbon               | Starch & Gelatin/236.0    | FTO-g/doctor blading  | I <sub>3</sub> /I <sup>-</sup>     | N719     | 18.3/3.2*   | 18.53/0.70/58.0 | 7.58/7.15       | <sup>174</sup> | 2017 |
| Fe/N-doped porous carbon         | Resorcinol/1041.73        | FTO-g/spin coating    | I <sub>3</sub> /I <sup>-</sup>     | N719     | -/-         | 12.53/0.74/74.9 | 6.94/6.69       | <sup>175</sup> | 2018 |
| N-doped porous carbon            | Resorcinol/690.0          | -/-                   | I <sub>3</sub> /I <sup>-</sup>     | -        | -/-         | 15.3/0.74/69.21 | 7.89/7.48       | <sup>176</sup> | 2019 |
| N, S-doped porous carbon         | Resorcinol/388.0          | -/-                   | I <sub>3</sub> /I <sup>-</sup>     | -        | -/-         | 19.6/0.67/60.76 | 8.03/7.52       | <sup>177</sup> | 2019 |
| CoSe <sub>2</sub> /Porous carbon | PVP & polystyrene/-       | FTO-g/doctor blading  | I <sub>3</sub> /I <sup>-</sup>     | N719     | 0.22/-      | 15.88/0.69/69.0 | 7.56/7.40       | <sup>155</sup> | 2019 |
| HCS/NiS/RGO                      | Polydopamine/366          | FTO-g/doctor blading  | I <sub>3</sub> /I <sup>-</sup>     | N719     | 0.14/13.7   | 22.3/0.77/54.07 | 9.32/8.06       | <sup>178</sup> | 2019 |
| Te-N-Porous carbon               | PAN- <i>b</i> -PBA/540.69 | FTO-g/spray coating   | I <sub>3</sub> /I <sup>-</sup>     | N719     | 2.45/0.24   | 17.06/0.73/77.3 | 9.67/9.62       | <sup>52</sup>  | 2019 |
| Te-N-Porous carbon               | PAN- <i>b</i> -PBA/540.69 | FTO-g/spray coating   | Co <sup>3+</sup> /Co <sup>2+</sup> | SGT-021  | 2.26/0.53   | 16.09/0.89/79.4 | 11.64/11.5<br>9 | <sup>52</sup>  | 2019 |
| CQD/CS                           | Resorcinol/1498           | FTO-g/doctor blading  | I <sub>3</sub> /I <sup>-</sup>     | N719     | 0.1/4.0     | 16.87/0.72/69.7 | 8.48/7.35       | <sup>179</sup> | 2020 |
| Ru-N-Porous carbon               | PAN- <i>b</i> -PBA/464.8  | FTO-g/spray coating   | Co <sup>3+</sup> /Co <sup>2+</sup> | SGT-021  | 0.034/1.18  | 18.20/0.83/76.1 | 11.42/11.1<br>6 | <sup>156</sup> | 2020 |

483 Abbreviations: FTO-g, fluorine doped tin oxide glass; PAN-*b*-PBA, polyacrylonitrile-*b*-poly(butyl acrylate); PVA, polyvinyl alcohol; PVP, polyvinylpyrrolidone; SSA, specific

484 surface area. \*Charge transfer unit is  $\Omega$

485

486

487

### 2.2.3. Graphene for dye-sensitized solar cells

Graphene is a flat monolayer of  $sp^2$  hybridized carbon atoms tightly packed into a 2D honeycomb lattice. It is the basic building block of many other carbon allotropes, such as graphite, charcoal, CNTs, and fullerenes (**Fig. 11**).<sup>102,103</sup> Graphene possesses many exceptional properties: high charge carrier mobility ( $\sim 10000 \text{ cm}^2 \text{ V}^{-1} \text{ s}^{-1}$ ),<sup>180–182</sup> high SSA ( $2630 \text{ m}^2 \text{ g}^{-1}$ ),<sup>183,184</sup> excellent thermal conductivity ( $\sim 3000 \text{ W m}^{-1} \text{ K}^{-1}$ ),<sup>185</sup> high Young's modulus ( $\sim 1 \text{ TPa}$ ),<sup>186</sup> and high optical transparency (97.7%).<sup>187</sup> Due to these unique properties, graphene has attracted most attention as a DSSC CE material among all of the carbon allotropes.<sup>188,114</sup> Pristine graphene has zero bandgaps, with no defects and functional groups.<sup>190–192</sup> Like graphite, basal planes of graphene are low free energy active sites. Therefore, pristine graphene acts like inert materials and shows very weak catalytic properties. However, creating defects and surface modification or functionalization with heteroatoms opens the bandgap and, thus, broadens its application in catalysis.

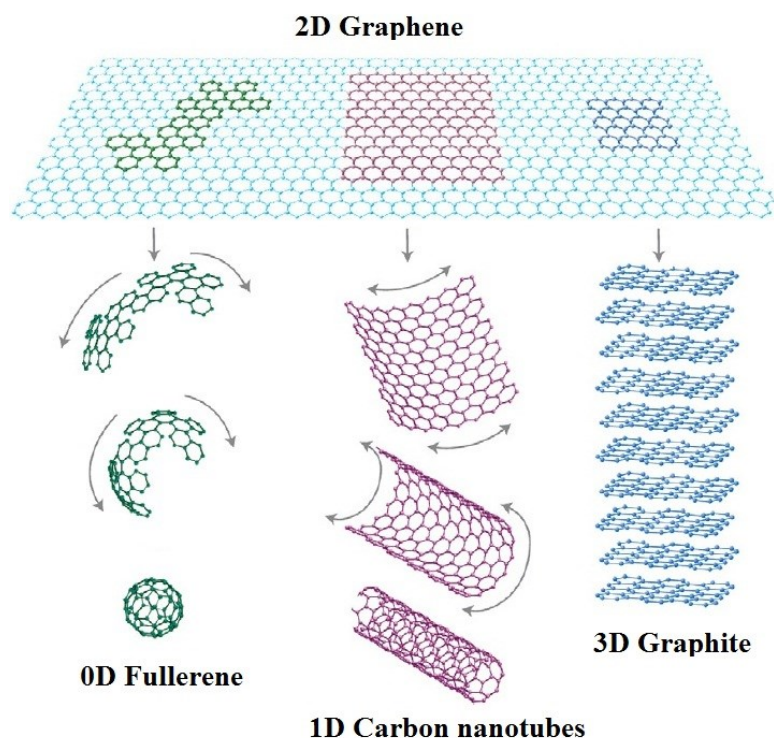

502 **Fig. 11.** Two-dimensional (2D) graphene is the foundation for 0D, 1D, and 3D carbon  
503 materials. It can be folded into 0D buckyballs, rolled into 1D nanotubes, or piled into 3D  
504 graphite.<sup>193</sup> Copyright 2007, Nature Publishing Group; reprinted with permission.<sup>158</sup>

505

506 The edge sites and topological defects in graphene can tune the electronic structures of  
507 basal planes. The edge sites usually include dangling groups and vacancies at the edge of the  
508 carbon. The dangling bonds located at the edge of sp<sup>2</sup>-hybridized carbon basal planes usually  
509 are high-energy sites and catalytic centers. Topological defects in nanocarbon materials can  
510 occur as nonhexagonal units in the form of patterned defects or a random point mismatches.  
511 Different research groups have used graphite and graphene nanoplatelets (GNPs), where edge  
512 sites are only catalytic sites, as CE in DSSCs and studied the effect of edge sites on catalytic  
513 activity. The number of edge sites as well as catalytic activity increases as the graphite and  
514 GNP particle size decreases.<sup>44,194,195</sup> To increase topological defects, Kong and Li used a  
515 template-directed chemical vapor deposition (CVD) approach to synthesize 3D nanomesh  
516 graphene frameworks (NGFs) (**Fig. 12**).<sup>196</sup> To synthesize NGFs, they deposited graphene  
517 frameworks on a MgO template, which they removed by hydrochloric acid washing. The result  
518 was a 3D nanomesh graphene framework. They used field-emission-scanning electron  
519 microscopy (FE-SEM), transmission electron microscopy (TEM), and Brunauer–Emmett–  
520 Teller (BET) methods to confirm topological defects and mesoporosity. The synergetic effect  
521 of a large surface area integrated with the improved surface edge defects make 3D NGFs a very  
522 efficient electrocatalyst toward the I<sub>3</sub><sup>-</sup> reduction reaction. Indeed, a DSSC with an NGF CE  
523 displays a PCE of 7.32%, which is analogous to that of a Pt CE (7.28%).

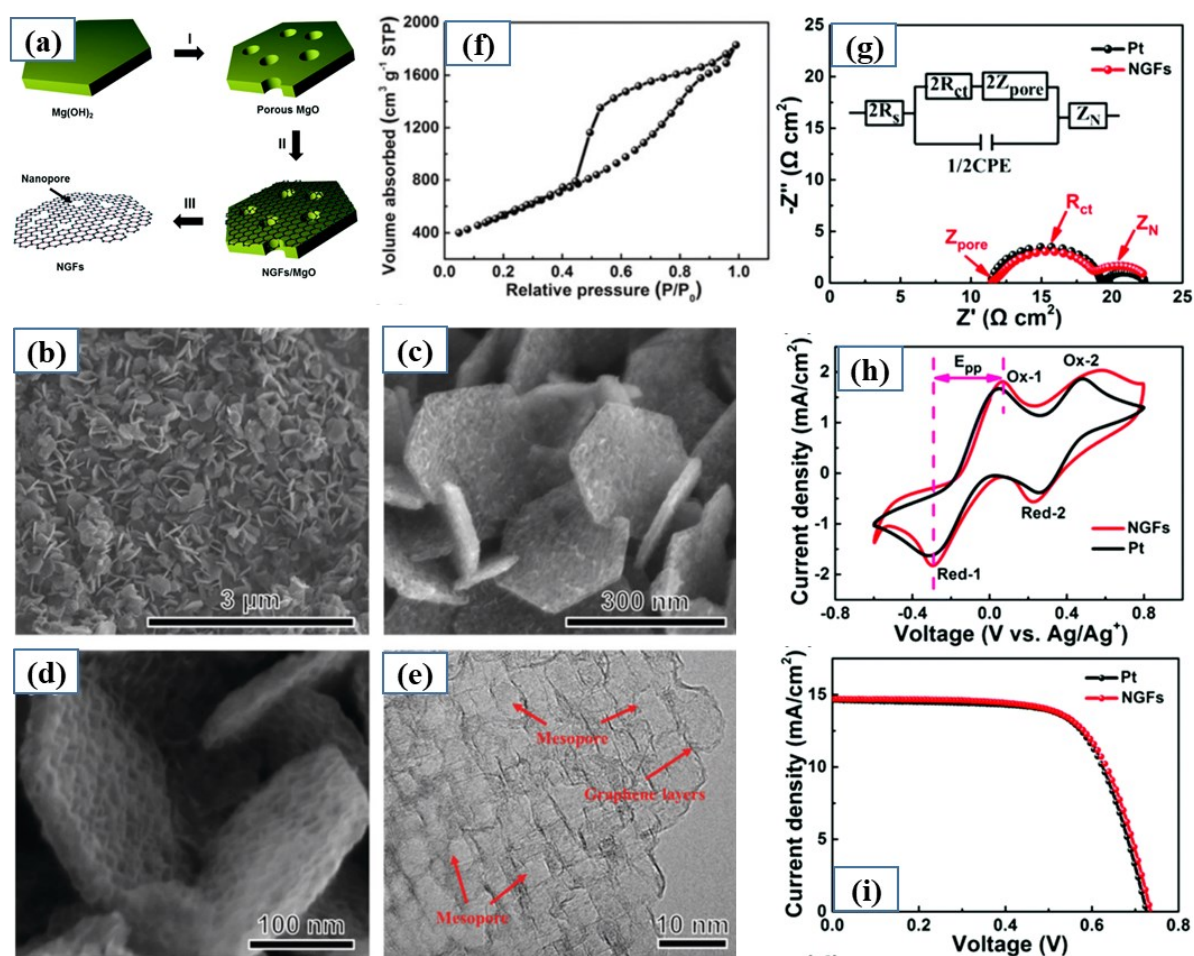

524

525 **Fig. 12.** (a) Schematic illustration of the nanomesh graphene framework (NGF) preparation  
 526 process. (b-d) Scanning electron microscopy (SEM), and (e) transmission electron microscopy  
 527 (TEM) images of NGFs, respectively. (f) Nitrogen sorption isotherms of NGFs. (g) Nyquist  
 528 plots of symmetric dummy cells, (h) CV curves, and (i) J-V plots of dye-sensitized solar cells  
 529 with platinum (Pt) and NGFs electrodes. Copyright 2016, American Chemical Society and The  
 530 Royal Society of Chemistry; reprinted with permission.<sup>196</sup>

531

532 To date, different techniques have been used to produce “pristine” graphene, such as  
 533 liquid exfoliation,<sup>197</sup> mechanical exfoliation (“Scotch Tape” method),<sup>180</sup> epitaxial growth,<sup>198</sup>  
 534 and chemical vapor deposition (CVD).<sup>199</sup> Modified Hummer methods are used to produce large  
 535 quantities of graphene oxide (GO) through the exfoliation of graphite and subsequent

536 reduction.<sup>200,201</sup> Graphene produced by this method is known as reduced graphene oxide (rGO);  
537 it contains few oxygens as impurities. Xu *et al.* first applied chemically reduced graphene oxide  
538 (CR-GO) film as a CE in a DSSC.<sup>202</sup> The PCE (2.2%) for CR-GO film as CE is higher  
539 compared to bare FTO (PCE = 0.05%), but many developments would be needed to achieve  
540 the efficiency of the typical Pt electrode (PCE = 4.0%). Although the oxygen functional group  
541 in the graphene structure is considered to be a catalytic active site, highly oxygenated graphene  
542 shows low electrical conductivity. Therefore, it is important to optimize the number of oxygen  
543 functional groups in rGO. Aksay *et al.* investigated the performance of oxygen-functionalized  
544 graphene sheets (OF-GS), synthesized via the thermal exfoliation of GO, as a CE in a DSSC.  
545 They found that the charge transfer resistance of OF-GS is 10 times higher compared to that of  
546 Pt without any applied potential. However, at the bias potential of 0.8 V, its charge transfer  
547 resistance is similar to that of a Pt CE. They also explored the consequence of modifying  
548 catalytic functional groups on OF-GS and found that increasing the content of oxygen  
549 functional groups may augment the catalytic activity of OF-GS. A C-to-O ratio lower than 13  
550 provides optimum efficiency for DSSCs, near to a Pt CE.<sup>203</sup>

551 Heteroatom (N, B, S, P, chlorine [Cl], selenium [Se], and Te, among others) doping is  
552 also an effective method to enhance the catalytic activity of graphene-based materials.  
553 Heteroatoms can be introduced directly into the graphene network by CVD or via a  
554 solvothermal process during graphene generation.<sup>204,205</sup> Furthermore, heteroatoms can be  
555 doped through post-treatment of graphene or GO, such as thermal annealing, ball milling, and  
556 plasma treatment.<sup>206–208</sup> N-doped materials are by far the most studied doped graphene  
557 materials. To use the synergetic effect of both topological defects and the N heteroatom, Wang  
558 and Li synthesized nitrogen-doped holey graphene (NHG) (**Fig. 13**).<sup>208</sup> The generated NHG  
559 shows high conductivity ( $3100 \text{ S m}^{-1}$ ) and a distinctive holey scaffold with abundant edge-  
560 induced topological defects and a large surface area ( $1874 \text{ m}^2 \text{ g}^{-1}$ ). Due to these special

561 properties, NHG displays excellent electrocatalytic activity with extraordinary electrochemical  
562 stability toward the  $I^-/I_3^-$  redox reaction. A DSSC fabricated with an NHG CE shows a PCE of  
563 9.07%, which is higher than that of the Pt CE (8.19%). In addition, the authors performed  
564 density-functional theory (DFT) calculations to further clarify the core mechanism after this  
565 boosting performance. They found that pyridinic and pyrrolic N satisfy the interaction  
566 threshold values of  $E_{\text{ads}}$  (0.33–1.20 eV) for  $I_3^-$  reduction. Furthermore, edge-induced  
567 topological defects, including five-carbon and seven-carbon rings, can indeed act as  
568 catalytically active sites to greatly enhance the catalytic activity for the IRR, especially a seven-  
569 carbon ring.

570 To use the synergetic effect of different heteroatoms, multiple heteroatoms such as N, B,  
571 P, S, and O, are doped into the graphene structure.<sup>209–212</sup> The catalytic mechanism of different  
572 heteroatoms is considered to be distinctive. Therefore, co-doping is hypothesized to  
573 significantly enhance catalytic activity due to the greater influence in energy bandgap, spin,  
574 and charge density. Furthermore, co-doping may increase the electrochemical stability and  
575 introduce a new route for catalysis, where carbon atoms can also be an active site for  
576 catalysts.<sup>212,213</sup>

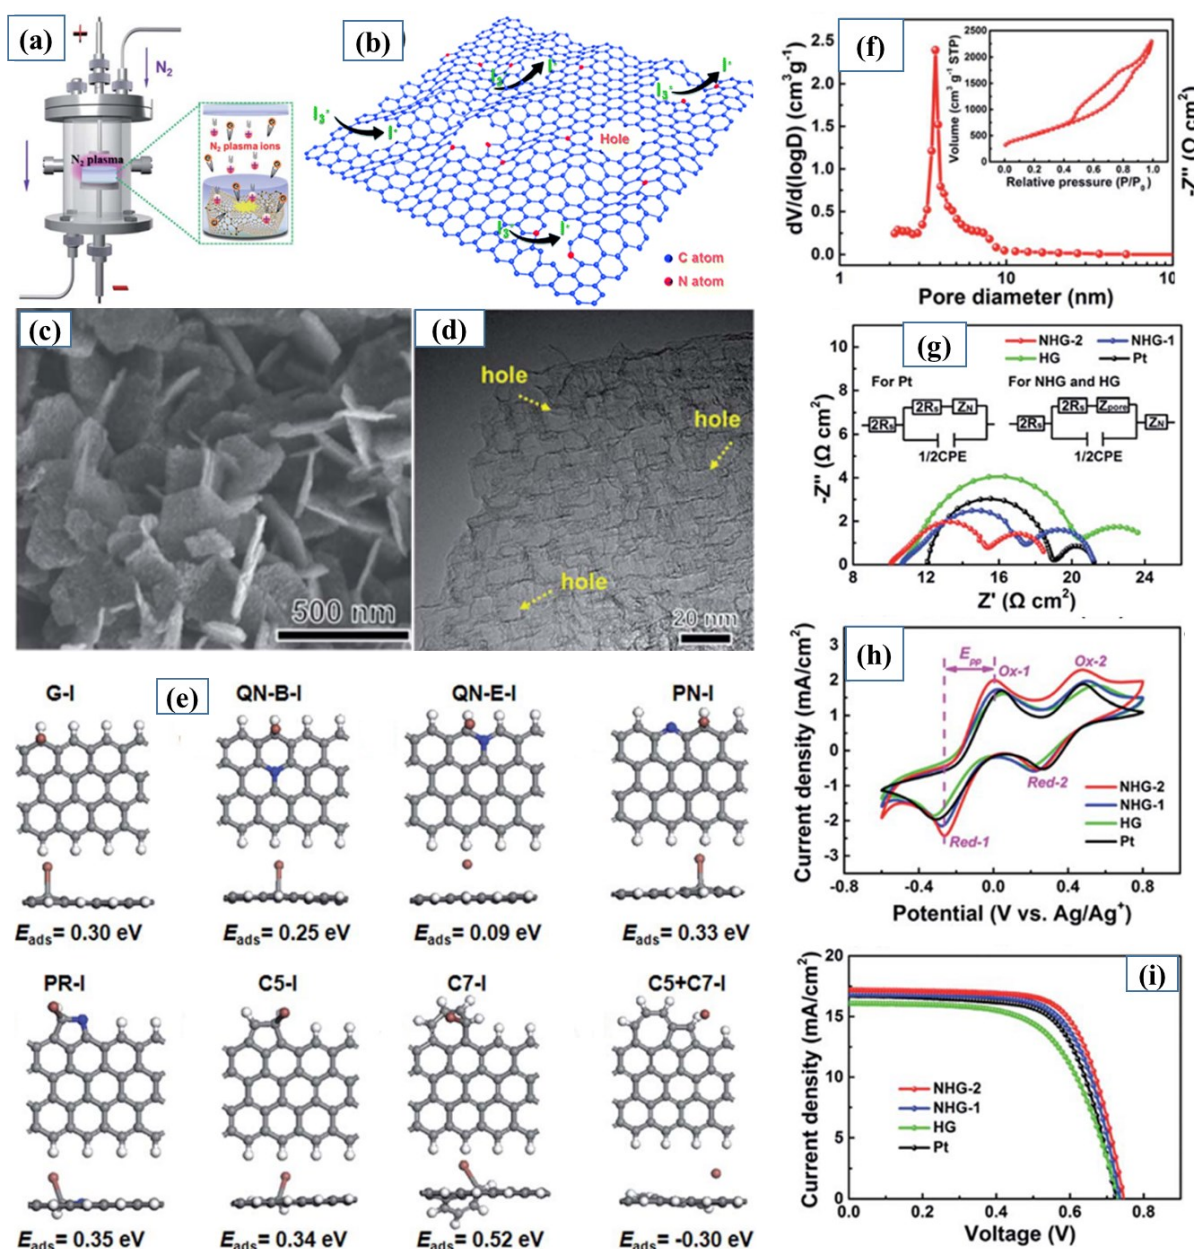

**Fig. 13.** (a, b) Schematic diagram of nitrogen-doped holey graphene (NHG) synthesis by N<sub>2</sub> plasma treatment. (c) Scanning electron microscopy (SEM) and (d) high-resolution transmission electron microscopy (HR-TEM) images of NHG. (e) Different configurations of the inspected substrates and density–functional theory (DFT) calculations of adsorption energy for the iodine (I) atom. The white, gray, brown, and blue balls stand for H, C, I, and N, atoms, respectively. (f) The pore-size distribution of NHG (inset: the nitrogen sorption isotherms). (g) Nyquist plots of symmetric dummy cells, (h) CV curves, and (i) J-V plots of dye-sensitized

585 solar cells with different electrodes. Copyright 2017, The Royal Society of Chemistry  
586 Reprinted with permission.<sup>208</sup>

587

588 Our group studied a series of edge-functionalized graphene nanoplatelets (EFGnPs) as  
589 metal-free CEs in DSSCs with different sensitizers.<sup>207,214–224</sup> We produced EFGnPs with a  
590 simple and environmentally friendly method, namely ball milling the desire substances  
591 (halogens, nonmetals, semimetals, or metalloids) with graphite (**Fig. 14a**). Edge-  
592 functionalization reduces the van der Waals forces of the graphene layers and facilitates their  
593 exfoliation. We utilized atomic-resolution transmission electron microscopy (AR-TEM) to  
594 ensure the pristine graphene basal plane and edge-selective Se doping in the SeGnPs (**Fig. 14b**,  
595 **c**). Our nonequilibrium Green's function (NEGF) and DFT calculations confirm that the single-  
596 coordinated Se-doping (C=Se) for both the zigzag and armchair edges well satisfies the I atom  
597 binding criterion, with adsorption energies of 0.48 and 0.77 eV, respectively (**Fig. 14d**).

598 Moreover, we elucidated the  $I_3^-$  reduction mechanism using NEGF and DFT calculations.  
599 The iodine reduction reaction (IRR) simulated diagram on the SeGnP surface is shown in **Fig.**  
600 **14e** based on electrochemical kinetics and DFT and NEGF results. The initial arc is considered  
601 due to the transmission resistance ( $R_{tm}$ ) in addition to capacitance ( $C_{ad}$ ) originated from the  
602 adsorption of  $I^-/I_3^-$  on the graphitic basal plane, and the second arc is due to the  $R_{ct}$  with double-  
603 layer capacitance ( $C_{dl}$ ) with regard to IRR at the edge of the Se-doped graphene and electrolyte  
604 interface (**Fig. 14f**, bottom diagram). We confirmed this by the monitoring the disappearance  
605 of the first semicircle at the elevated temperature (**Fig. 14f**, top diagram). With increasing  
606 temperature, thermodynamic variations of the graphene and  $I^-/I_3^-$  redox couple will rigorously  
607 reduce the binding strength between the two and finally start desorption of  $I^-/I_3^-$  from the  
608 graphitic basal plane.

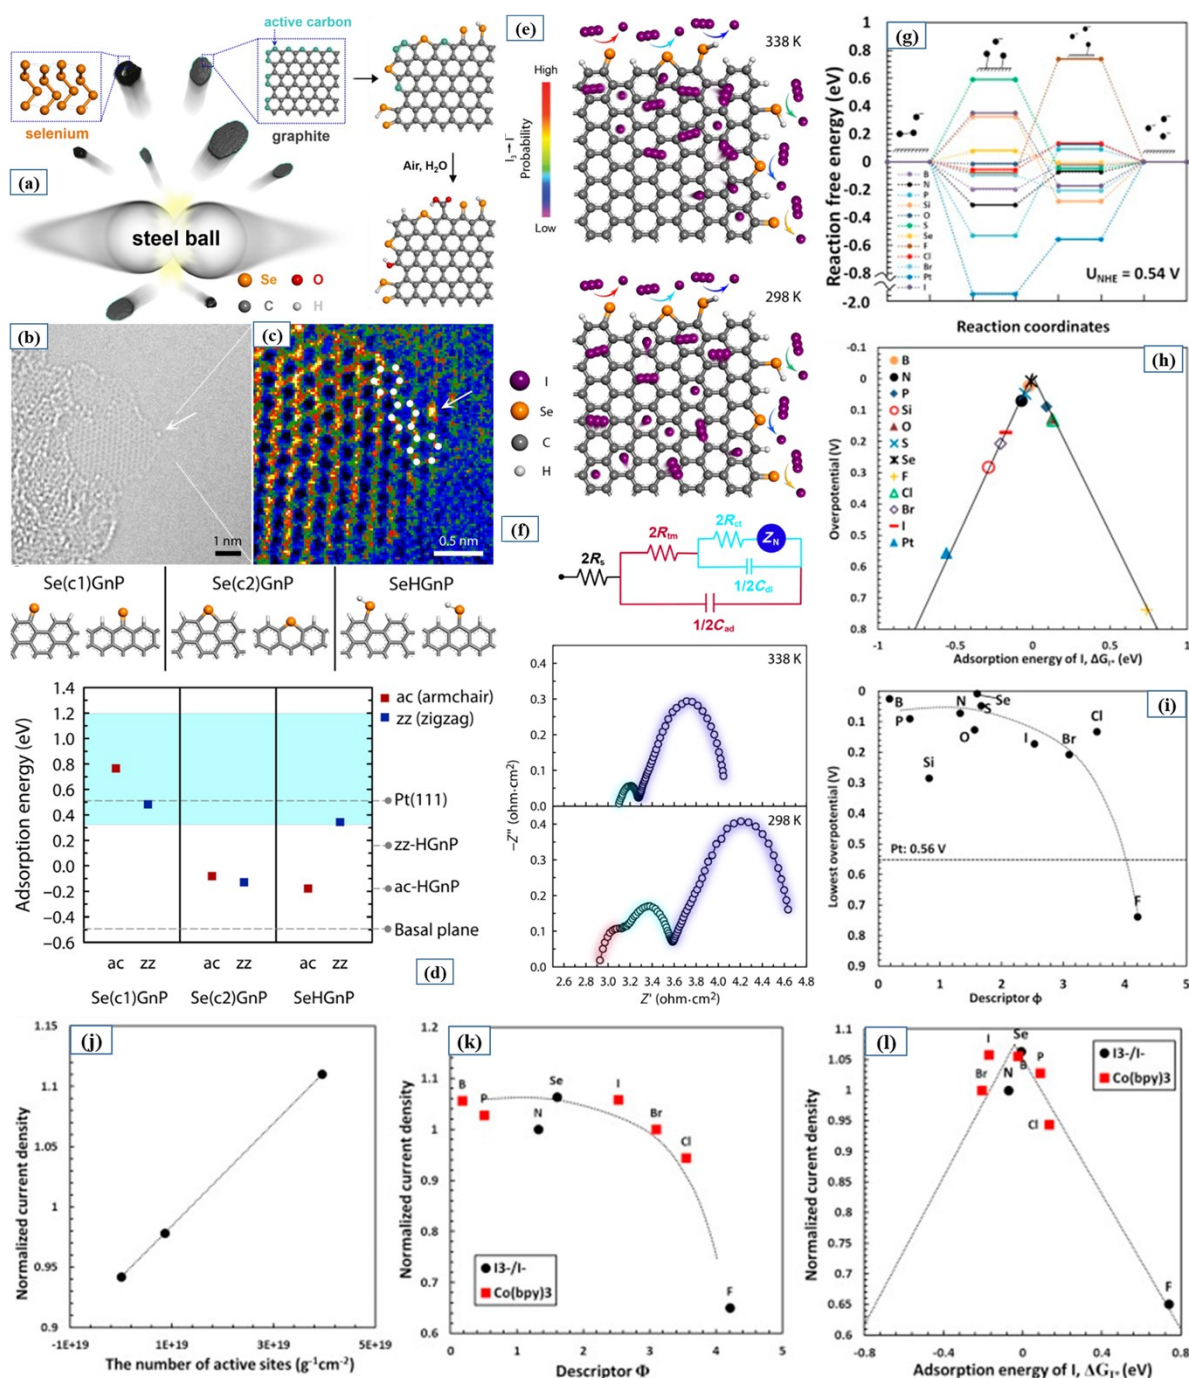

609

610 **Fig. 14.** (a) Schematic representation of mechanochemically driven selenium-doped graphene  
 611 nanoplatelets (SeGnPs). (b) An atomic-resolution transmission electron microscopy (AR-  
 612 TEM) image obtained at the edge of SeGnPs. (c) Corresponding inverse fast Fourier transform  
 613 (IFFT) images of a graphene edge with armchair and zigzag conformations. (d) We estimated  
 614 the adsorption energies of the iodine (I) atom explicitly solvated by acetonitrile molecules for  
 615 the representative single-coordinated, double-coordinated, and hydrogenated Se [Se(c1),

616 Se(c2), and SeH, respectively]–doped armchair (ac) and zigzag (zz) graphene edges (top  
 617 panel), and compared them with the undoped edge and basal plane cases (bottom panel). In the  
 618 bottom panel, the colored region indicates the IRR activity criterion. (e) The IRR mimetic  
 619 diagram on the SeGnP surface. (f) Nyquist plots of SeGnP-CEs and their equivalent circuit  
 620 (EC) at room temperature.<sup>218</sup> Copyright 2016, American Association for the Advancement of  
 621 Science; reprinted according to CC BY-SA 3.0). (g) Free energy diagram of platinum (Pt) (111)  
 622 surface and X-doped graphene. (h) Volcano plots of X-doped graphene and (i) the lowest  
 623 overpotential of each doped-graphene as a function of descriptor  $\phi$ . Normalized current density  
 624 is presented as a function of (j) the number of active sites, (k) the descriptors, and (l) the  
 625 adsorption energy of I,  $\Delta G_{I^*}$  on the graphene surface. Copyright 2018, Elsevier; reprinted with  
 626 permission.<sup>225</sup>

627

628 Recently, Xia *et al.* proposed a detailed design rule for p-block heteroatom-doped (X)  
 629 graphene as effective IRR catalysts using DFT calculations (**Fig. 14g–l**).<sup>225</sup> Almost all of the  
 630 X-doped graphene nanoribbons have comparatively lower adsorption energy with respect to Pt  
 631 (-0.56 V). A heteroatom with higher electronegativity shows the highest polarization effect in  
 632 the graphene structure; however, strong electronegativity boosts its interaction with the  
 633 adsorbates and, consequently, leads to low catalytic activity. Therefore, the electronegativity  
 634 of the heteroatoms should be modest. In the volcano plots, boron (B)-, N-, O-, S-, and Se-doped  
 635 graphene sheets are located near the summit, where both the overpotential and the adsorption  
 636 energy are equivalent to zero; this location signifies the highest catalytic activities.  
 637 Furthermore, another descriptor:

638 
$$\phi = E_X A_X / E_C A_C ,$$

639 where  $E_X$  and  $E_C$  are electronegativities of the dopant and carbon,  $A_X$  and  $A_C$  are electron  
 640 affinities of the dopant and carbon, describes the catalytic activity of doped carbon

641 nanomaterials for IRR in DSSCs. According to this descriptor, a lower  $\phi$  value indicates better  
642 catalytic activity. The dopant amount or number of active sites also play a critical role in  
643 catalytic activity. The normalized current density increases with more active sites, and catalytic  
644 activity is higher than that of Pt when the value of  $\phi$  is smaller than 3. The detailed information  
645 of graphene CEs and their electrocatalytic and photovoltaic properties in DSSCs are  
646 summarized in **Table 5**.

647 **Table 5** Graphene counter electrodes (CEs) and their electrocatalytic and photovoltaic properties in dye-sensitized solar cells.

| CE Materials                   | SSA<br>(m <sup>2</sup> g <sup>-1</sup> ) | Substrate/Coating<br>technology | Redox<br>Couple                    | Sensitizer  | $R_s/R_{ct}$<br>( $\Omega$ cm <sup>2</sup> ) | $J_{sc}/V_{oc}/FF$<br>(mA cm <sup>-2</sup> /V/%) | $\eta^{CE}/\eta^{Pt}$<br>(%) | Ref        | Year        |
|--------------------------------|------------------------------------------|---------------------------------|------------------------------------|-------------|----------------------------------------------|--------------------------------------------------|------------------------------|------------|-------------|
| GNB (graphite nanoball)        | 1329.16                                  | ITO-g/drop casting              | I <sub>3</sub> /I <sup>-</sup>     | N719        | -/0.77                                       | 16.59/0.70/67.0                                  | 7.88/8.38                    | 194        | 2015        |
| N-GNRs (graphene nanoribbons)  |                                          | FTO-g/doctor blading            | I <sub>3</sub> /I <sup>-</sup>     | N719        | 2.58/0.23                                    | 15.18/0.78/72.1                                  | 8.57/7.84                    | 226        | 2015        |
| Graphene organogels            | 998.0                                    | Ti mesh/mechanical pressure     | I <sub>3</sub> /I <sup>-</sup>     | N719        | 2.71/1.72 <sup>†</sup>                       | 16.34/0.77/58.0                                  | 7.20/5.90                    | 227        | 2016        |
| aGNP                           | 91.0                                     | FTO-g/spray coating             | I <sub>3</sub> /I <sup>-</sup>     | N719        | 2.68/1.56                                    | 22.54/0.73/47.0                                  | 7.70/8.10                    | 228        | 2016        |
| NGF                            | 1920.0                                   | FTO-g/ screen printing          | I <sub>3</sub> /I <sup>-</sup>     | N719        | 5.74/3.61                                    | 14.70/0.736/67.7                                 | 7.32/7.28                    | 196        | 2016        |
| N-GNP                          | 679.15                                   | FTO-g/spray coating             | I <sub>3</sub> /I <sup>-</sup>     | N3          | 7.7/ 0.6                                     | 16.15/0.719/66.0                                 | 7.69/8.06                    | 229        | 2016        |
| 3D graphene                    | 575.0                                    | FTO-g/doctor blading            | I <sub>3</sub> /I <sup>-</sup>     | N719        | -/-                                          | 19.29/0.78/67.0                                  | 10.09/7.09                   | 230        | 2016        |
| rGO(-)/N-rGO(+)                | -                                        | FTO-g/spin coating              | I <sub>3</sub> /I <sup>-</sup>     | N719        | 4.1/9.9                                      | 20.59/0.73/48.91                                 | 7.03/7.14                    | 211        | 2016        |
| P-graphene                     | -                                        | FTO-g/spray coating             | I <sub>3</sub> /I <sup>-</sup>     | N719        | 6.74/3.87                                    | 14.82/0.721/66.3                                 | 7.08/7.19                    | 231        | 2017        |
| GNPs                           | -                                        | FTO-g/doctor blading            | I <sub>3</sub> /I <sup>-</sup>     | -           | 6.25/6.0*                                    | 15.5/0.69/65.0                                   | 7.01/6.23                    | 195        | 2017        |
| 3D graphene                    | -                                        | FTO-g/doctor blading            | I <sub>3</sub> /I <sup>-</sup>     | N719        | -/-                                          | 16.60/0.78/64.0                                  | 8.25/-                       | 232        | 2017        |
| N-hole-graphene                | -                                        | FTO-g/spray coating             | I <sub>3</sub> /I <sup>-</sup>     | N719        | 5.03/1.92                                    | 17.19/0.74/70.9                                  | 9.07/8.19                    | 208        | 2017        |
| <b>S-doped porous graphene</b> | <b>416</b>                               | <b>FTO-g/doctor blading</b>     | <b>I<sub>3</sub>/I<sup>-</sup></b> | <b>N719</b> | <b>1.78/0.10</b>                             | <b>16.70/0.75/69.2</b>                           | <b>8.67/7.88</b>             | <b>233</b> | <b>2017</b> |
| N-graphene                     | -                                        | Carbon cloth/CVD                | I <sub>3</sub> /I <sup>-</sup>     | N719        | -/-                                          | 16.09/0.70/67.0                                  | 7.53/7.70                    | 205        | 2018        |
| GNPs                           | -                                        | FTO-g/doctor blading            | I <sub>3</sub> /I <sup>-</sup>     | N3          | 5.05/1.68*                                   | 17.2/0.68/57.0                                   | 6.72/7.26                    | 234        | 2018        |
| N, S-graphene                  | -                                        | Carbon cloth/CVD                | I <sub>3</sub> /I <sup>-</sup>     | N719        | -/-                                          | 15.71/0.80/72.0                                  | 9.02/-                       | 235        | 2019        |
| Graphene                       | 141.7                                    | FTO-g/spray coating             | I <sub>3</sub> /I <sup>-</sup>     | N719        | 16.36/0.43*                                  | 14.71/0.75/68.0                                  | 7.48/7.64                    | 210        | 2019        |
| SnS <sub>2</sub> @RGO          | -                                        | FTO-g/doctor blading            | I <sub>3</sub> /I <sup>-</sup>     | N719        | 8.98/3.62*                                   | 14.80/0.72/67.02                                 | 7.12/-                       | 236        | 2015        |
| Au/GNP                         | -                                        | FTO-g/drop casting              | Co <sup>3+</sup> /Co <sup>2+</sup> | ADEK & LEG4 | -/-                                          | 18.27/1.014/77.1                                 | 14.3/13.                     | 14         | 2015        |

|                                     |        |                                         |                                    |         |            |                    |              |                 |      |
|-------------------------------------|--------|-----------------------------------------|------------------------------------|---------|------------|--------------------|--------------|-----------------|------|
| In <sub>2</sub> S <sub>3</sub> /rGO | -      | FTO-g/spray coating                     | I <sub>3</sub> /I <sup>-</sup>     | N719    | 3.11/1.16* | 15.48/0.78/66.0    | 8.01/7.18    | <sup>237</sup>  | 2015 |
| rGO–CoS                             |        | FTO-g/spray coating & electrodeposition | I <sub>3</sub> /I <sup>-</sup>     | N719    | 1.1/1.05*  | 17.02/0.77/63.0    | 8.34/7.50    | <sup>238</sup>  | 2015 |
| GD–PEDOT:PSS                        | -      | FTO-g/drop casting                      | I <sub>3</sub> /I <sup>-</sup>     | N719    | -/3.96*    | 14.70/0.72/70.0    | 7.36/-       | <sup>239</sup>  | 2015 |
| N-graphene/PEDOT                    | -      | FTO-g/drop casting & electro deposition | I <sub>3</sub> /I <sup>-</sup>     | N719    | 7.78/1.43  | 15.60/0.74/72.0    | 8.30/8.17    | <sup>240</sup>  | 2015 |
| CoS/rGO                             | -      | FTO-g/electrophoretic deposition        | I <sub>3</sub> /I <sup>-</sup>     | N719    | 8.02/1.79  | 18.58/0.77/63.0    | 9.39/7.34    | <sup>241</sup>  | 2015 |
| Graphene/CNT-Pt                     | -      | FTO-g/spray coating                     | I <sub>3</sub> /I <sup>-</sup>     | N719    | 3.16/0.12  | 18.57/0.78/67.0    | 9.70/8.63    | <sup>242</sup>  | 2015 |
| CNT/graphene                        | -      | FTO-g/spray coating                     | I <sub>3</sub> /I <sup>-</sup>     | N719    | -/1.3*     | 17.03/0.73/61.1    | 7.62/6.90    | <sup>243</sup>  | 2015 |
| CoTe/RGO                            | 58.65  | FTO-g/spin coating                      | I <sub>3</sub> /I <sup>-</sup>     | N719    | 5.30/2.93  | 17.41/0.77/68.5    | 9.18/8.17    | <sup>244</sup>  | 2015 |
| PtNP–GDNS                           | -      | FTO-g/drop casting                      | I <sub>3</sub> /I <sup>-</sup>     | N719    | 47.73/1.10 | 14.13/0.80/0.56    | 6.35/5.39    | <sup>245</sup>  | 2015 |
| GO/PEDOT-PSS                        | -      | FTO-g/doctor blading                    | I <sub>3</sub> /I <sup>-</sup>     | N719    | -/-        | 13.48/0.77/68.3    | 7.065/-      | <sup>246</sup>  | 2015 |
| FGnPs                               | 134.79 | FTO-g/spray coating                     | Co <sup>3+</sup> /Co <sup>2+</sup> | JK-306  | -/0.29     | 14.44/0.96/71.5    | 10.01/9.61   | <sup>247</sup>  | 2015 |
| ClGnPs                              | 550.0  | FTO-g/spray coating                     | Co <sup>3+</sup> /Co <sup>2+</sup> | JK-306  | 2.89/2.24  | 14.40/0.96/69.2    | 9.58/9.92    | <sup>219</sup>  | 2015 |
| BrGnPs                              | 595.0  | FTO-g/spray coating                     | Co <sup>3+</sup> /Co <sup>2+</sup> | JK-306  | 2.74/1.44  | 14.59/0.97/71.6    | 10.03/9.92   | <sup>219</sup>  | 2015 |
| IGnPs                               | 668.24 | FTO-g/spray coating                     | Co <sup>3+</sup> /Co <sup>2+</sup> | JK-306  | 2.74/0.46  | 14.81/0.98/71.3    | 10.31/9.92   | <sup>219</sup>  | 2015 |
| RGO/MWCNTs/NiO                      | -      | FTO-g/doctor blading                    | I <sub>3</sub> /I <sup>-</sup>     | N719    | -/-        | 16.80/0.71/68.0    | 8.13/-       | <sup>248</sup>  | 2015 |
| TiS <sub>2</sub> –graphene          | -      | FTO-g/doctor blading                    | I <sub>3</sub> /I <sup>-</sup>     | N719    | 2.32/0.63  | 17.76/0.72/68.5    | 8.80/8.00    | <sup>249s</sup> | 2016 |
| B, N–graphene                       | -      | FTO-g/doctor blading                    | I <sub>3</sub> /I <sup>-</sup>     | N719    | 4.0/0.3    | 15.3/0.77/69.0     | 8.08/6.34    | <sup>250</sup>  | 2016 |
| Graphene/CNF-Ni                     | -      | FTO-g/spray coating                     | I <sub>3</sub> /I <sup>-</sup>     | N719    | 4.23/0.72  | 14.31/0.84/60.0    | 7.14/7.59    | <sup>251</sup>  | 2016 |
| CoN <sub>4</sub> /graphene          | -      | FTO-g/spray coating                     | I <sub>3</sub> /I <sup>-</sup>     | N719    | -/-        | 17.32/0.72/67.36   | 8.40/7.98    | <sup>252</sup>  | 2016 |
| SbGnPs                              | 302.0  | FTO-g/spray coating                     | Co <sup>3+</sup> /Co <sup>2+</sup> | SGT-021 | 1.40/0.094 | 17.21/ 0.93/ 75.53 | 12.08/ 11.09 | <sup>207</sup>  | 2016 |
|                                     |        |                                         | I <sub>3</sub> /I <sup>-</sup>     | N719    | -/10.80    | 18.23/0.74/64.81   | 8.70/9.98    | <sup>214</sup>  | 2018 |
| SeGnPs                              | 105.69 | FTO-g/spray coating                     | Co <sup>3+</sup> /Co <sup>2+</sup> | SM315   | 3.20/0.13  | 16.27/ 0.88/77.0   | 10.98/10.11  | <sup>218</sup>  | 2016 |

|                                            |        |                           |                                    |         |                        |                   |             |                |      |
|--------------------------------------------|--------|---------------------------|------------------------------------|---------|------------------------|-------------------|-------------|----------------|------|
|                                            |        |                           | I <sub>3</sub> /I <sup>-</sup>     | N719    | 2.92/0.23              | 18.16/ 0.69/ 0.73 | 9.17/9.07   | <sup>218</sup> | 2016 |
|                                            |        |                           | Co <sup>3+</sup> /Co <sup>2+</sup> | SGT-130 |                        | 15.60/0.83/78.62  | 10.18/ 9.77 | <sup>217</sup> | 2016 |
| TeGnP <sub>s</sub>                         | 590.09 | FTO-g/spray coating       | Co <sup>3+</sup> /Co <sup>2+</sup> | SM315   | 1.54/0.15              | 16.53/0.92/75.9   | 11.58/11.03 | <sup>217</sup> | 2016 |
|                                            |        |                           | I <sub>3</sub> /I <sup>-</sup>     | N719    | -/0.49                 | 18.20/0.74/75.73  | 10.25/9.98  | <sup>214</sup> | 2018 |
| GO                                         |        | Cotton fabric/dip coating | I <sub>3</sub> /I <sup>-</sup>     | N719    | 3.6/0.62*              | 14.75/0.66/70.92  | 6.93/8.44   | <sup>253</sup> | 2016 |
| N, P-graphene                              | 325.0  | FTO-g/doctor blading      | I <sub>3</sub> /I <sup>-</sup>     | N719    | -/-                    | 15.91/0.77/69.97  | 8.57/7.58   | <sup>206</sup> | 2016 |
| MoS <sub>2</sub> /Graphene sheet           | -      | FTO-g/CVD                 | I <sub>3</sub> /I <sup>-</sup>     | N719    | 1.6/1.7                | 16.1/0.66/67      | 7.1/7.4     | <sup>254</sup> | 2016 |
| MoS <sub>2</sub> /rGO                      | -      | FTO-g/electrodeposition   | I <sub>3</sub> /I <sup>-</sup>     | N719    | 1.25/0.99              | 16.96/0.72/65.74  | 8.01/8.21   | <sup>255</sup> | 2016 |
| Fe <sub>2</sub> O <sub>3</sub> /graphene   | 114.0  | FTO-g/screen printing     | I <sub>3</sub> /I <sup>-</sup>     | N719    | 5.99/5.32              | 15.05/0.73/68.0   | 8.0/7.7     | <sup>256</sup> | 2016 |
| NiCo <sub>2</sub> S <sub>4</sub> /graphene |        | FTO-g/drop casting        | I <sub>3</sub> /I <sup>-</sup>     | N719    | 8.13/1.72              | 15.62/0.72/70.5   | 7.98/8.01   | <sup>257</sup> | 2016 |
| Graphene/FeS <sub>2</sub>                  | -      | FTO-g/dip coating         | I <sub>3</sub> /I <sup>-</sup>     | N719    | -/-                    | 17.01/0.78/56.0   | 7.43/6.40   | <sup>258</sup> | 2016 |
| g-C <sub>3</sub> N <sub>4</sub> /graphene  | 114.0  | FTO-g/doctor blading      | I <sub>3</sub> /I <sup>-</sup>     | N3      | -/0.9                  | 14.91/0.72/66.0   | 7.13/7.37   | <sup>259</sup> | 2016 |
| rGO-NiCo <sub>2</sub> S <sub>4</sub>       | -      | FTO-g/spin coating        | I <sub>3</sub> /I <sup>-</sup>     | N719    | 4.85/0.18              | 16.40/0.75/66.1   | 8.15/7.23   | <sup>260</sup> | 2017 |
| Co <sub>0.85</sub> Se/RGO                  | -      | FTO-g/spray coating       | I <sub>3</sub> /I <sup>-</sup>     | N719    | 10.95/0.95             | 16.01/0.71/69.0   | 7.81/7.55   | <sup>261</sup> | 2017 |
| SrRuO <sub>3</sub> /GQD                    | -      | FTO-g/spin coating        | I <sub>3</sub> /I <sup>-</sup>     | N719    | 1.92/4.65              | 15.62/0.76/68     | 7.97/7.23   | <sup>262</sup> | 2017 |
| PANI/GO                                    | -      | FTO-g/doctor blading      | I <sub>3</sub> /I <sup>-</sup>     | N719    | 3.62/0.87              | 15.72/0.77/68.0   | 8.19/7.37   | <sup>263</sup> | 2017 |
| CoSe/graphene                              | -      | ITO-g/doctor blading      | I <sub>3</sub> /I <sup>-</sup>     | N719    | 0.23/0.91 <sup>†</sup> | 17.96/0.75/68.8   | 9.27/7.68   | <sup>264</sup> | 2017 |
| Graphene dot/PEDOT:PSS                     | -      | FTO-g/drop casting        | I <sub>3</sub> /I <sup>-</sup>     | N719    | -/-                    | 14.70/0.72/70.0   | 7.36/8.46   | <sup>265</sup> | 2017 |
| FeS <sub>2</sub> /S-graphene               | -      | -/-                       | I <sub>3</sub> /I <sup>-</sup>     |         | -/11.2*                | 16.51/0.80/59.0   | 7.82/8.13   | <sup>266</sup> | 2017 |
| TiN/N-graphene                             | 270.0  | FTO-g/doctor blading      | I <sub>3</sub> /I <sup>-</sup>     | N719    | -/-                    | 15.8/0.79/69.0    | 8.9/9.0     | <sup>267</sup> | 2017 |
| CoFeS <sub>2</sub> /rGO                    | -      | FTO-g/doctor blading      | I <sub>3</sub> /I <sup>-</sup>     | N719    | 1.96/0.62              | 15.85/0.78/71.0   | 8.82/8.40   | <sup>268</sup> | 2017 |
| N,S-graphene                               | 405.0  | FTO-g/drop casting        | I <sub>3</sub> /I <sup>-</sup>     | C106    | 10.93/0.48*            | 16.86/0.74/74.0   | 9.40/9.10   | <sup>212</sup> | 2017 |

|                                             |        |                            |                                |      |                       |                    |            |     |      |
|---------------------------------------------|--------|----------------------------|--------------------------------|------|-----------------------|--------------------|------------|-----|------|
| W <sub>18</sub> O <sub>49</sub> -rGO        | —      | —/—                        | I <sub>3</sub> /I <sup>-</sup> | N719 | -/-                   | 17.18/0.70/60.0    | 7.23/7.39  | 269 | 2017 |
| PtMo/RGO                                    | —      | —/—                        | I <sub>3</sub> /I <sup>-</sup> | N719 | -/0.63*               | 18.73/0.74/65.31   | 9.11/8.03  | 270 | 2017 |
| Fe <sub>3</sub> O <sub>4</sub> @N-RGO       | 88.0   | FTO-g/doctor blading       | I <sub>3</sub> /I <sup>-</sup> | N719 | 2.71/0.09             | 17.4/0.79/ 66.95   | 9.26/7.72  | 271 | 2018 |
| MoS <sub>2</sub> .GO/SWCNT                  | 238.25 | FTO-g/drop casting         | I <sub>3</sub> /I <sup>-</sup> | N719 | 11.98/0.35            | 18.14/0.74/60.01   | 8.01/7.21  | 272 | 2018 |
| rGO/Mn                                      | -      | FTO-g/drop casting         | I <sub>3</sub> /I <sup>-</sup> | N719 | -/-                   | 17.20/0.74/58.0    | 7.47/7.11  | 273 | 2018 |
| PEDOT/rGO                                   | -      | FTO-g/electrodeposition    | I <sub>3</sub> /I <sup>-</sup> | N719 | 18.88/9.08            | 15.82/0.73/67.0    | 7.79/8.33  | 274 | 2018 |
| NiCo <sub>2</sub> S <sub>4</sub> /rGO       | -      | FTO-g/drop casting         | I <sub>3</sub> /I <sup>-</sup> | N719 | -/-                   | 17.34/0.76/57.0    | 7.48/7.24  | 275 | 2018 |
| Co <sub>3</sub> S <sub>4</sub> /rGO         | -      | FTO-g/doctor blading       | I <sub>3</sub> /I <sup>-</sup> | N719 | 3.05/ 0.145*          | 14.97/0.755/67.4   | 8.08/7.62  | 276 | 2018 |
| In <sub>2.77</sub> S <sub>4</sub> /graphene | 78.5   | FTO-g/doctor blading       | I <sub>3</sub> /I <sup>-</sup> | N719 | 2.8/0.28              | 14.92/0.74/66.0    | 7.32/6.48  | 277 | 2018 |
| g-C <sub>3</sub> N <sub>4</sub> QD@3DG      | 119.5  | FTO-g/doctor blading       | I <sub>3</sub> /I <sup>-</sup> | N719 | 19.49/13.5*           | 15.14/0.719/68.0   | 7.46/-     | 278 | 2018 |
| Graphene/NiMoS                              | -      | Directly/electrodeposition | Gel electrolyte                | N719 | 1.05/0.66*            | 15.0/0.73/64.0     | 7.0/5.1    | 279 | 2018 |
| MoS <sub>2</sub> /RGO                       | -      | FTO-g/dip coating          | I <sub>3</sub> /I <sup>-</sup> | N719 | -/-                   | 17.01/0.72/62.0    | 7.63/7.01  | 280 | 2018 |
| Fe <sub>3</sub> O <sub>4</sub> @N-rGO       | -      | FTO-g/doctor blading       | I <sub>3</sub> /I <sup>-</sup> | N719 | 3.26/0.14             | 17.0 /0.77/62.50   | 8.18/7.17  | 281 | 2018 |
| CuS/ZnS@rGO                                 | 201.1  | FTO-g/doctor blading       | I <sub>3</sub> /I <sup>-</sup> | N719 | 4.17/0.21             | 17.58/0.73/66.0    | 8.45/7.61  | 281 | 2018 |
| C-CW/FeS <sub>2</sub> @RGO                  | 100.65 | FTO-g/doctor blading       | I <sub>3</sub> /I <sup>-</sup> | N719 | 8.7/1.17 <sup>†</sup> | 17.82/0.68/60.89   | 7.38/6.24  | 282 | 2018 |
| Se-doped graphene                           | -      | FTO-g/doctor blading       | I <sub>3</sub> /I <sup>-</sup> | N719 | 0.5/-                 | 17.05/0.74/67.0    | 8.42/7.74  | 283 | 2018 |
| g-C <sub>3</sub> N <sub>4</sub> QD@3DG      | -      | FTO-g/doctor blading       | I <sub>3</sub> /I <sup>-</sup> | N719 | 13.5/19.49            | 15.14/ 0.719/ 0.68 | 7.46/7.46  | 278 | 2018 |
| SWCNH/rGO                                   | -      | FTO-g/spray coating        | I <sub>3</sub> /I <sup>-</sup> | N719 | 15.0/13.2             | 17.22/0.73/65.0    | 8.27/8.36  | 284 | 2019 |
| Ru/RGO                                      | -      | FTO-g/drop casting         | I <sub>3</sub> /I <sup>-</sup> | N719 | 1.12/1.94             | 13.31/0.62/74.61   | 6.78/6.20  | 284 | 2019 |
| RGO-3DGNs                                   | -      | Ni/CVD                     | I <sub>3</sub> /I <sup>-</sup> | N719 | -/-                   | 21.0/0.70/66.1     | 9.79/9.56  | 285 | 2019 |
| Graphene/SWCNT                              | 325.81 | FTO-g/drop casting         | I <sub>3</sub> /I <sup>-</sup> | N719 | 12.88/0.32            | 20.76/0.76/66.54   | 10.56/7.64 | 286 | 2019 |
| MoS <sub>2</sub> -rGO                       | 56.90  | FTO-g/-                    | I <sub>3</sub> /I <sup>-</sup> | N719 | 13.37/1.93*           | 16.75/0.76/61.6    | 7.83/-     | 287 | 2019 |

|                                      |       |                      |                                |      |             |                 |           |                |      |
|--------------------------------------|-------|----------------------|--------------------------------|------|-------------|-----------------|-----------|----------------|------|
| Co <sub>9</sub> S <sub>8</sub> /RGO  | 7.3   | FTO-g/doctor blading | I <sub>3</sub> /I <sup>-</sup> | N719 | 16.53/0.78* | 15.90/0.73/63.0 | 7.31/7.72 | <sup>288</sup> | 2019 |
| CoS <sub>1.097</sub> /Graphite paper | -     | Directly             | I <sub>3</sub> /I <sup>-</sup> | N719 | 0.59/1.32   | 13.96/0.70/71.5 | 6.99/6.43 | <sup>289</sup> | 2019 |
| Graphene                             | 141.7 | FTO-g/spray coating  | I <sub>3</sub> /I <sup>-</sup> | N719 | 16.36/0.43* | 14.71/0.75/68.0 | 7.48/7.64 | <sup>210</sup> | 2019 |

648 Abbreviations: FTO-g, fluorine-doped tin oxide glass; GnP, graphene nanoplatelet; GO, graphene oxide; NGF, nanomesh graphene framework; PEDOT:PSS, poly(3,4-  
649 ethylenedioxythiophene) polystyrene sulfonate; rGO, reduced graphene oxide; REG-3DGN, reduced graphene oxide–three-dimensional graphene network; SSA, specific  
650 surface area; SWCNT, single-walled carbon nanotube. \*Charge transfer unit is  $\Omega$ , †Charge transfer unit is  $\Omega \text{ cm}^{-2}$

651

#### 652 2.2.4. Carbon nanotubes (CNTs) for dye-sensitized solar cells

653 CNTs are continuous cylinders comprise one or more layers of graphene, with open or  
654 closed ends.<sup>290</sup> CNTs are associated with the fullerene structural group, also recognized as  
655 tubular fullerenes or buckytubes. Considering the number of graphene layers, CNTs are called  
656 single-walled carbon nanotubes (SWCNTs) or multi-walled carbon nanotubes (MWCNTs),  
657 with a typical diameter of 0.8–2 nm or 5–20 nm, respectively. However, MWCNT diameters  
658 can exceed 100 nm. MWCNTs are a collection of nested tubes that are held together by van  
659 der Waals forces (similar to graphene sheets). They can have anywhere from 2 to more than  
660 100 tubes (walls). CNT lengths range from less than 100 nm to a few centimeters, providing a  
661 length-to-diameter ratio equal to 132,000,000:1, considerably higher than any other materials.  
662 CNTs are bound with each other through “dispersion forces” and have diverse structures,  
663 including a vertically-aligned CNT forest, CNT bundles, horizontally aligned CNTs, a random  
664 network of interconnected CNTs, etc.

665 Pristine CNTs are seamless cylinders, but unlike pristine graphene, they have some  
666 catalytic activity that originates from metallic impurities, pyramidalization, and misalignment  
667 of pi-orbitals and sidewall defects.<sup>291,292</sup> In 2003, Suzuki *et al.* first used SWCNTs as a CE in  
668 DSSCs; they perform better compared to other carbon nanomaterials (carbon filament and  
669 carbon nanohorn), with a PCE of 4.5%, which is analogous to the cell-based on Pt-sputtered  
670 CE under the same conditions.<sup>293</sup> Double-walled carbon nanotubes (DWCNTs) and triple-  
671 walled carbon nanotubes (TWCNTs) are more catalytically active than SWCNTs and  
672 MWCNTs.<sup>292,294</sup> The lower catalytic activity of SWCNTs is likely due to the disruption of the  
673  $\pi$ -electron system and electronic conductivity of SWCNTs by the adsorption of foreign  
674 elements during electrocatalytic processes. However, outer wall defects in DWCNTs act as  
675 catalytic sites while the inner wall act as a metallic electron conductor.<sup>295</sup> With regard to the  
676 outer wall and inner tube distance in the range of electron tunneling, the effective electron

transmission from the outer wall to the inner tubes may occur through electron tunneling under the electrochemical polarization driving force.<sup>296</sup> This electron tunneling process would become less favorable as the number of walls increases due to the decreasing polarization effect across the inner tubes.<sup>292</sup> Therefore, CNTs with different walls show pyramidal catalytic activity. Three different DSSCs based on SWCNTs, DWCNTs, and MWCNTs were fabricated by Zhang *et al.* The PCE is comparable: 8.03% (DWCNTs) > 7.61% (SWCNTs) > 7.06% (MWCNTs).

CNTs can be metallic or semiconductor, based upon how delocalized electrons dwell in a one-dimensional (1D) density of states. However, SWCNT sidewall functionalization substantially changes electrical properties through the localization of these electrons. Furthermore, sidewall functionalization enhances the dispersibility and processability in aqueous and organic solvents. Different covalent and non-covalent methods are used to functionalize CNTs. Qiu *et al.* reported plasma-activated oxygen-functionalized carbon nanotubes (P-CNTs) with abundant defect sites (**Fig. 15a–f**).<sup>297</sup> DFT calculations and experimental results confirmed the positive effects of oxygen toward the electrochemical behaviors of I<sub>3</sub><sup>-</sup> reduction. Furthermore, strong plasma activation cleaves the surface of the CNT sidewall to generate more exposed open ends and edges. Notably, a DSSC with a P-CNT CE shows a high PCE of 8.35%, clearly higher than the Pt CE performance (8.04%). DFT calculations revealed that the oxygen species on the surface hydroxyl groups and the carbonyl groups reduce the ionization energy of the P-CNTs through the adjustment of electronic properties of neighboring carbon atoms. This efficiently decreases the charge transfer resistance and hastens electron transfer.

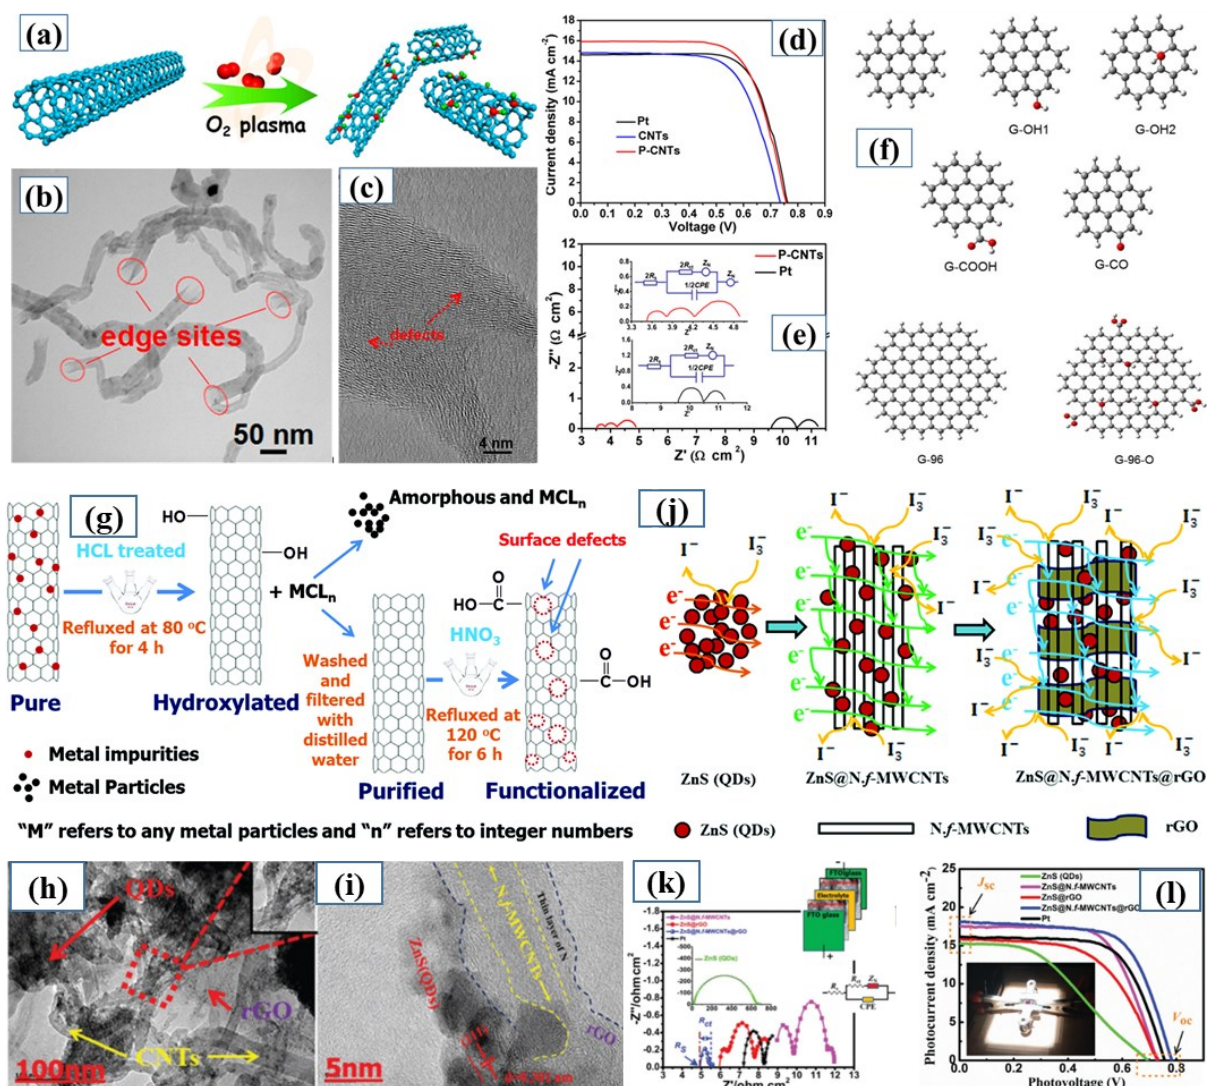

699

700 **Fig. 15** (a) Schematic representation for O-functionalized plasma-activated carbon nanotube  
 701 (P-CNT) synthesis. (b, c) High-resolution transmission electron microscopy (HR-TEM) image  
 702 of P-CNTs. (d) J-V curves of dye-sensitized solar cells (DSSCs) and (e) Nyquist plots of  
 703 symmetric dummy cells with platinum (Pt), carbon nanotube (CNT), and P-CNT electrodes.  
 704 (f) Different atomic models diagram for O-functionalized P-CNTs. Copyright 2018, American  
 705 Chemical Society; reprinted with permission.<sup>297</sup>. (g) Schematic illustration of the  
 706 functionalization of multi-walled carbon nanotubes (MWCNTs). (h, i) HR-TEM images of  
 707 ZnS@N.f-MWCNTs composite wrapped with reduced graphene oxide (rGO). (j) Increased  
 708 performance mechanism of the ZnS@N.f-MWCNTs@rGO electrode. (k) Nyquist plots of

709 symmetric dummy cells and (l) J-V plots of DSSCs with different electrodes. Copyright 2020,  
710 The Royal Society of Chemistry; reprinted with permission.<sup>298</sup>

711

712 Unlike atomic size and electronegativity, the integration of heteroatoms will result in  
713 charge rearrangement of adjacent carbon matrix and distort the lattice order, phenomena that  
714 activate unique physicochemical properties. Among various doping elements, electron-rich  
715 N and electron-deficient B are believed to be a likely candidate for the efficient chemical-  
716 doping of carbon materials. This effect may be due to the lone-pair electron in N and electron  
717 vacancy in B, which easily allows to polarize the chemically inactive sp<sup>2</sup> carbon network and  
718 induce sufficient free-flowing  $\pi$  electrons to act as catalysts for electrochemical applications.  
719 Besides, the incorporation of N and B may considerably enhance the conductivity of carbon  
720 materials by escalating the density of n- and p-type charge carriers, respectively. To use the  
721 synergetic effect of high surface area, edge defects, and heteroatom, Wu *et al.* prepared  
722 bamboo-like N-doped carbon nanotubes (N-CNTs) by straight pyrolysis of nanostructured  
723 Prussian blue analog (metal hexacyanoferrates). The pyrolysis temperature helped control the  
724 structure of the resulting carbon materials. At 700°C, the authors obtained bamboo-like N-  
725 CNTs with the desired catalytic properties.<sup>299</sup>

726 Chemically altering the CNT surface and incorporating low-cost metal-based  
727 nanoparticles is another feasible way to improve the CNT catalytic activity. Specifically,  
728 transition metals can influence the carbon structure: They can adjust the electronic structure,  
729 WF, and electrical conductivity of carbon materials by electron-donating effect through  
730 incompletely filled 3d orbital. Recently, NiS, FeS, FeC, CoTe, CoS, CoSe, and Co<sub>2</sub>O<sub>3</sub> have  
731 been reported as an efficient CE for a DSSC.<sup>300–306</sup> Li *et al.* reported rGO wrapped N-doped  
732 functionalized MWCNTs incorporated with zinc sulfide quantum dots (ZnS QDs) (**Fig. 15g–**

733 i).<sup>298</sup> Initially, they functionalized MWCNTs with  $-\text{COOH}$  and  $-\text{OH}$  groups by using a  
734 refluxing strategy. The functional groups act as sites for the nucleation of the ZnS(QDs) as  
735 oxygen-containing groups. The ZnS@N.f-MWCNTs@rGO have an intertwined distinctive  
736 hollow structure with a particular surface area that is suitable for use as a CE. The  
737 electrochemical performance showed that at the electrolyte/CE interface, the ZnS@N.f-  
738 MWCNTs@rGO electrode has a lower charge transfer resistance ( $R_{ct}$ ) and a greater catalytic  
739 ability than naked ZnS QDs.

740 Chen *et al.* reported Co-embedded and N-CNTs supported by  $\text{Mo}_2\text{C}$  nanoparticles  
741 ( $\text{Mo}_2\text{C}/\text{N-CNTs@Co}$ ) heterostructure as a highly efficient and stable electrocatalyst (**Fig.**  
742 **16**).<sup>307</sup> These authors used a simple and straightforward method to synthesize  $\text{Mo}_2\text{C}/\text{N-}$   
743  $\text{CNTs@Co}$  by *in situ* metal precursor carbonization and nitridation, using cobalt acetate as a  
744 Co precursor,  $(\text{NH}_4)_4\text{Mo}_7\text{O}_{24}$  as a Mo precursor, and melamine as a C/N precursor. The DSSC  
745 with a  $\text{Mo}_2\text{C}/\text{N-CNTs@Co}$  CE shows a high PCE of 8.82% and outstanding electrochemical  
746 stability, with a remaining efficiency of 7.95% after constant illumination for 200 h; these  
747 values are better than the DSSC with a Pt CE. Furthermore, the authors calculated higher  
748 catalytic property of  $\text{Mo}_2\text{C}/\text{N-CNTs@Co}$  with DFT. Specifically, the WF of Co-embedded and  
749 N- CNTs is correspondingly regulated from 4.91 to 4.52 eV with an electron-donating effect.  
750 In addition,  $\text{Mo}_2\text{C}$  nanoparticles display a Pt-like 4d electronic configuration and present a  
751 thriving matched WF (4.85 eV) with  $\text{I}^-/\text{I}_3^-$  redox couples (4.90 eV).

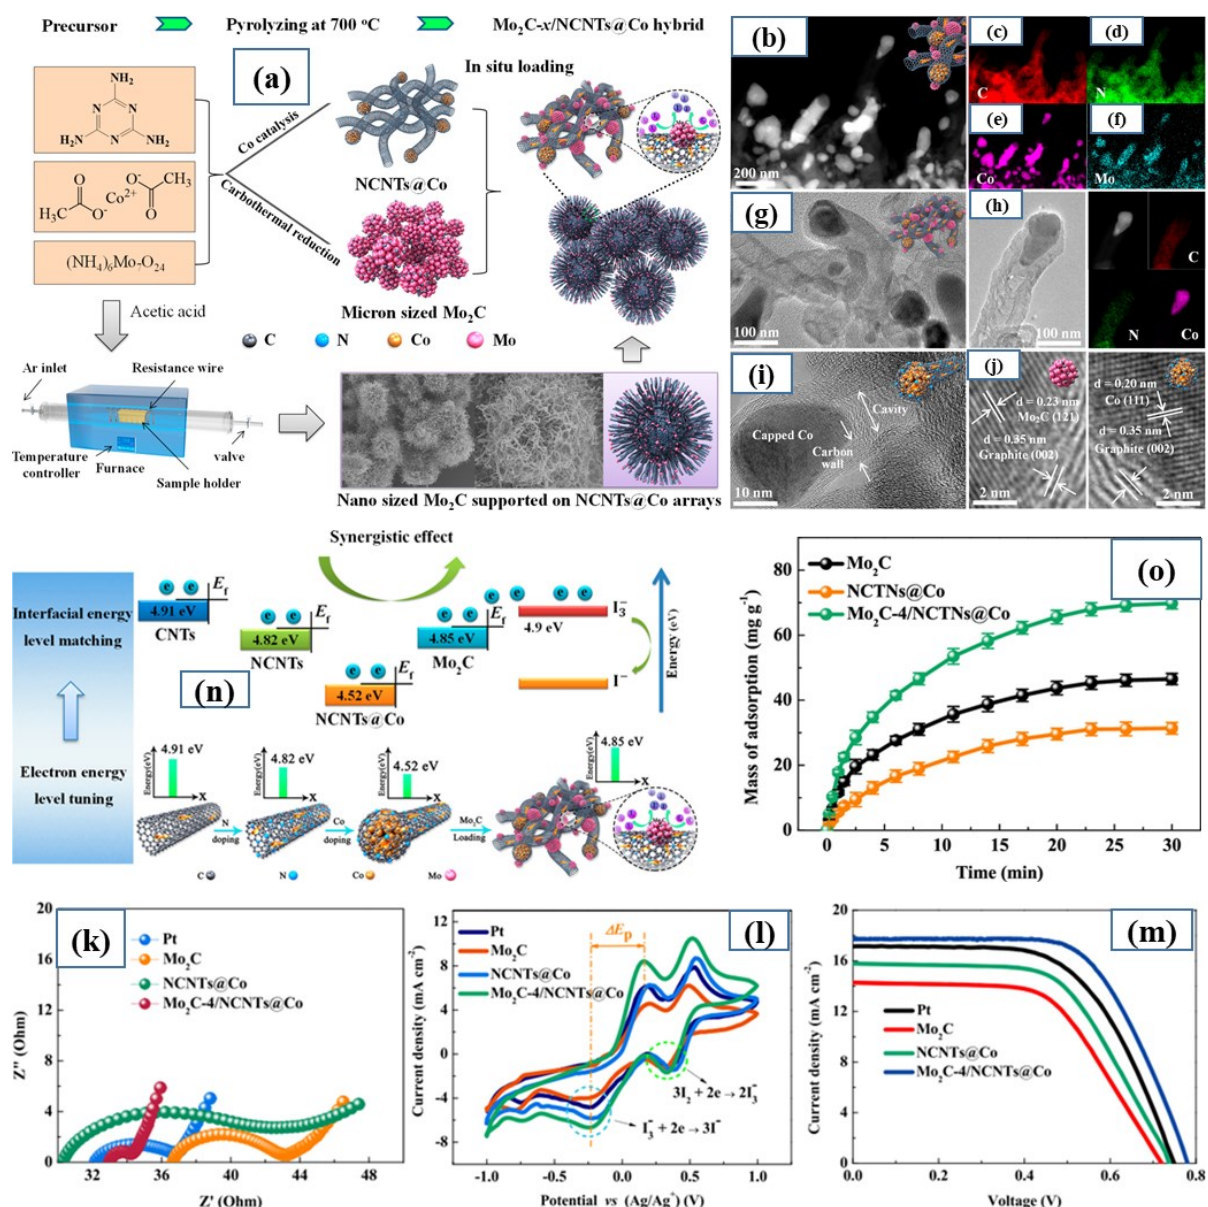

754 **Fig. 16.** Schematic presentation of the synthesis of  $\text{Mo}_2\text{C}-x/\text{NCNTs}@Co$  hybrids (a). Annular  
 755 dark-field transmission electron microscopy (TEM) images (b, g-j) and TEM mapping (c-f, h)  
 756 of the  $\text{Mo}_2\text{C}-4/\text{NCNTs}@Co$  hybrid and single  $\text{NCNTs}@Co$  in  $\text{Mo}_2\text{C}-4/\text{NCNTs}@Co$ . (k)  
 757 Nyquist plots of symmetric dummy cells. (l) CV curves and (m)  $J-V$  plots of DSSCs with  
 758 different electrodes. (n) Schematic presentation of interfacial energy level matching of  
 759  $\text{Mo}_2\text{C}/\text{NCNTs}@Co$  hybrid. (o) The adsorption capacity of  $\text{I}_3^-$  on  $\text{Mo}_2\text{C}-4/\text{NCNTs}@Co$ ,

760 NCNTs@Co, and Mo<sub>2</sub>C. (m) J–V curves of dye-sensitized solar cells based on different  
761 electrodes. Copyright 2019, American Chemical Society; reprinted with permission.<sup>307</sup>

762

763       The elastic modulus and tensile strength of the CNTs are very high due to covalent  
764 sp<sup>2</sup> bonds that form between the individual carbon atoms. Espinosa *et al.* observed that elastic  
765 modulus and tensile strength of the cross-sectional area for individual MWNTs are 1 TPa and  
766 100 GPa, respectively.<sup>308</sup> The higher elastic modulus and tensile strength of the CNTs makes  
767 them favorable for producing flexible and stretchable DSSCs. Different groups have recently  
768 reported wire-like DSSCs with high photovoltaic efficiency that contain different structural  
769 configurations by exploiting the 1D and flexible properties of CNTs.<sup>309–311</sup> Ali *et al.*<sup>309</sup> used  
770 TiO<sub>2</sub> nanotubes and TiO<sub>2</sub> NP–modified Ti-wire as a working electrode and twisted a  
771 CoSe@MWCNTs composite fiber as a CE around it. They sealed the resultant wire-like  
772 DSSC into a transparent plastic tube with redox electrolyte (**Fig. 17a–c**). Xue *et al.*<sup>310</sup> utilized  
773 TiO<sub>2</sub> nanotubes and TiO<sub>2</sub> NP–modified photoanode and a 3D graphene–modified CNT fiber  
774 CE sidewise in the transparent fluorinated ethylene propylene (FET) tube containing the  
775 electrolyte (**Fig. 17d–k**). Notably, the photovoltaic efficiency of the wire-like DSSCs  
776 fabricated with modified CNT fiber CE is much higher compared to the Pt wire CE. The  
777 detailed information of carbon nanotube counter electrodes and their electrocatalytic and  
778 photovoltaic properties in DSSCs are summarized in **Table 6**.

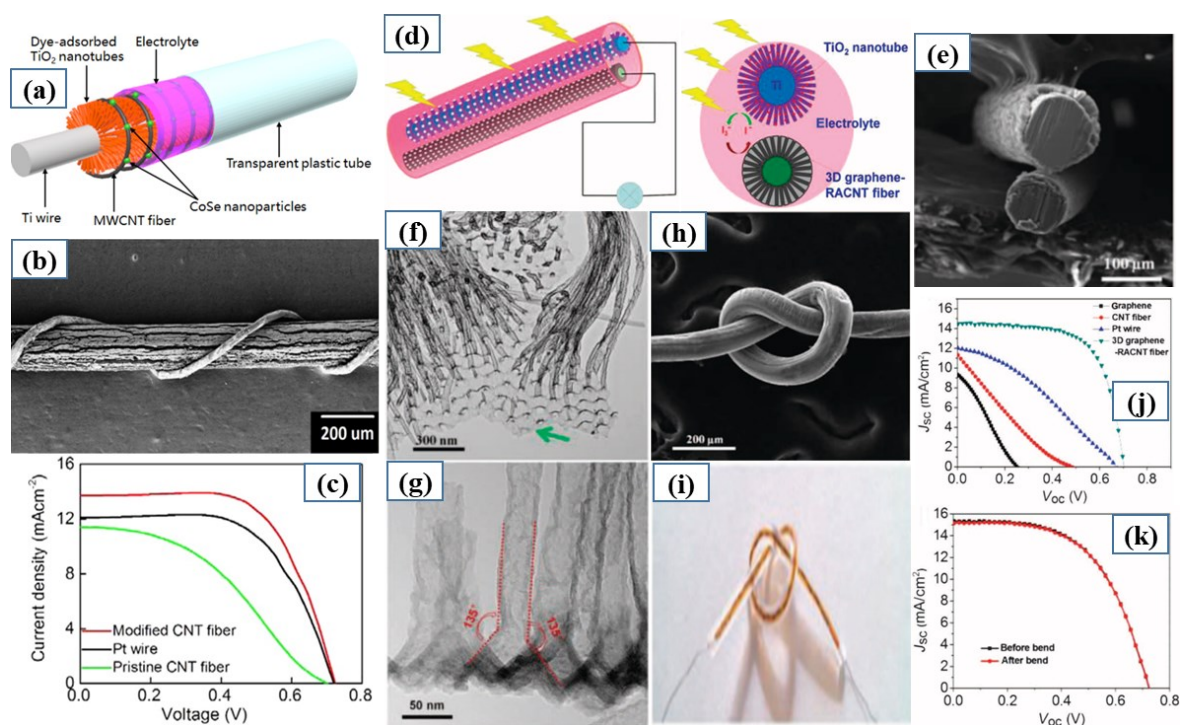

779

780 **Fig. 17** (a) Schematic illustration of a wire-shaped dye-sensitized solar cell (DSSC) that  
 781 comprises a working electrode on the inside and a counter electrode (CE) on the outside. (b) A  
 782 scanning electron microscopy (SEM) image of electrochemically modified Ti wire twisted with  
 783 a multi-walled carbon nanotube (MWCNT) fiber. (c) J-V curves of fiber-shaped DSSCs with  
 784 different CEs. Copyright 2016, American Chemical Society; reprinted with permission.<sup>309</sup> (d)  
 785 Schematic illustration of wire-shaped DSSC containing a working electrode with a CE  
 786 alongside it. (e) A SEM image of the cross-section view of the wire-shaped DSSC. (f, g) A  
 787 transmission electron microscopy (TEM) image of a graphene sheet connected to the open tips  
 788 of radially aligned CNTs. (h, i) An SEM image of a knot of the graphene-CNT fiber, as well  
 789 as a knot of the flexible DSSC. (j) A J-V curve of DSSCs with different electrodes and (k) a  
 790 J-V curve of a DSSC before and after bending with graphene-CNT fiber electrode.<sup>310</sup> Copyright  
 791 2015, American Association for the Advancement of Science; reprinted under CC BY-SA 3.0.

793 **Table 6** Carbon nanotube (CNT) counter electrodes (CEs) and their electrocatalytic and photovoltaic properties in dye-sensitized solar cells.

| CE materials                           | SSA<br>(m <sup>2</sup> g <sup>-1</sup> ) | Substrate/coating<br>technology           | Redox<br>couple                             | Sensitizer | $R_s/R_{ct}$<br>( $\Omega$ cm <sup>2</sup> ) | $J_{sc}/V_{oc}/FF$<br>(mA cm <sup>-2</sup> /V/%) | $\eta^{CE}/\eta^{Pt}$<br>(%) | Ref | Year |
|----------------------------------------|------------------------------------------|-------------------------------------------|---------------------------------------------|------------|----------------------------------------------|--------------------------------------------------|------------------------------|-----|------|
| N-CNT                                  | 261                                      | FTO-g/electrophoretic<br>deposition       | I <sub>3</sub> <sup>-</sup> /I <sup>-</sup> | N719       | 26/2.1*                                      | 14.35/0.726/71.8                                 | 7.48/7.12                    | 299 | 2016 |
| CNH                                    | -                                        | FTO-g/drop casting                        | I <sub>3</sub> <sup>-</sup> /I <sup>-</sup> | N719       |                                              | 16.14/0.79/61.0                                  | 7.70/7.92                    | 312 | 2016 |
| MWCNT                                  |                                          | Carbon fabric/spin coating                | Quasi-solid<br>electrolyte                  | N719       | 3.84/1.03*                                   | 15.34/0.72/76.16                                 | 8.44/ 8.90                   | 313 | 2017 |
| O-CNT                                  | 112                                      | FTO-g/doctor blading                      | I <sub>3</sub> <sup>-</sup> /I <sup>-</sup> | N719       | -/-                                          | 15.92/0.76/69.2                                  | 8.35/8.04                    | 297 | 2019 |
| SWCNT                                  |                                          | FTO-g/screen printing                     | Cu <sup>2+</sup> /Cu <sup>1+</sup>          | Y123       | 2.4/0.68                                     | 11.0/0.97/65.3                                   | 7.0/6.2                      | 314 | 2019 |
| CNT                                    | 250                                      | FTO-g/-                                   | I <sub>3</sub> <sup>-</sup> /I <sup>-</sup> | N719       | -/-                                          | 20.0/0.64/69.0                                   | 8.8/8.7                      | 315 | 2019 |
| N-doped graphene/CNT                   |                                          | FTO-g/spin coating                        | I <sub>3</sub> <sup>-</sup> /I <sup>-</sup> | N719       | -/1.78                                       | 16.23/0.77/54.2                                  | 6.74/ 6.89                   | 316 | 2015 |
| CNT/PPy/PEDOT                          |                                          | Carbon/electrodeposition                  | I <sub>3</sub> <sup>-</sup> /I <sup>-</sup> | N719       | 16.72/2.15*                                  | 14.99/0.76/63.0                                  | 7.17/7.20                    | 317 | 2015 |
| CNT <sup>-</sup> /CNT <sup>+</sup>     |                                          | FTO-g/dip coating                         | I <sub>3</sub> <sup>-</sup> /I <sup>-</sup> | N719       | -/-                                          | 18.03/0.71/71.0                                  | 9.13/8.40                    | 318 | 2015 |
| CNT/Graphene                           | 526.91                                   | Al wire/CVD                               | I <sub>3</sub> <sup>-</sup> /I <sup>-</sup> | N719       | -/-                                          | 14.50/0.70/67.0.                                 | 6.80/2.74                    | 310 | 2015 |
| CNT/Graphene                           |                                          | Cu-foil/CVD                               | I <sub>3</sub> <sup>-</sup> /I <sup>-</sup> | N719       | -/-                                          | 16.6/0.72/66.0                                   | 7.9/7.0                      | 319 | 2015 |
| NiO-NF/MWCNT                           | 111.2                                    | FTO-g/doctor blading                      | I <sub>3</sub> <sup>-</sup> /I <sup>-</sup> | N719       | 7.94/0.54*                                   | 18.54/0.64/63.9                                  | 7.63/ 6.72                   | 320 | 2015 |
| MWCNT/enzyme                           |                                          | FTO-g/tape casting                        | I <sub>3</sub> <sup>-</sup> /I <sup>-</sup> | N719       | 4.41/0.7                                     | 14.57/0.69/74.48                                 | 7.52/8.00                    | 321 | 2015 |
| MoS <sub>2</sub> /RGO-CNTs             |                                          | FTO-g/electrophoretic<br>deposition       | I <sub>3</sub> <sup>-</sup> /I <sup>-</sup> | N719       | 10.18/1.65                                   | 14.59/0.76/67.0                                  | 7.46/ 7.23                   | 322 | 2015 |
| NG/CNT-OH                              | 343.02                                   | PET/-                                     | I <sub>3</sub> <sup>-</sup> /I <sup>-</sup> | N719       | 4.8/1.93                                     | 13.62/0.71/65.31                                 | 6.36/ 5.74                   | 323 | 2016 |
| AC/MWCNT                               |                                          | FTO-g/tape casting                        | I <sub>3</sub> <sup>-</sup> /I <sup>-</sup> | N719       | 4.05/0.30*                                   | 16.07/0.75/83.0                                  | 10.05/ 9.30                  | 324 | 2016 |
| PPy/MWCNT                              |                                          | FTO-g/spin coating &<br>electrodeposition | I <sub>3</sub> <sup>-</sup> /I <sup>-</sup> | N719       | 6.8/38.15                                    | 17.56/0.74/55.0                                  | 7.15/7.76                    | 325 | 2016 |
| g-C <sub>3</sub> N <sub>4</sub> /MWCNT |                                          | FTO-g/doctor blading                      | I <sub>3</sub> <sup>-</sup> /I <sup>-</sup> | N3         | 8.2/1.05                                     | 14.20/0.72/62.0                                  | 6.34/6.84                    | 326 | 2016 |
| CNT/Pt                                 | 482.4                                    | FTO-g/-                                   | I <sub>3</sub> <sup>-</sup> /I <sup>-</sup> | N719       | -/-                                          | 16.57/0.78/70.0                                  | 8.77/7.01                    | 327 | 2016 |

|                                             |          |                                                 |                                             |      |             |                 |            |     |      |
|---------------------------------------------|----------|-------------------------------------------------|---------------------------------------------|------|-------------|-----------------|------------|-----|------|
| MWCNTs/TiO <sub>2</sub>                     |          | FTO-g/doctor blading                            | I <sub>3</sub> <sup>-</sup> /I <sup>-</sup> | N719 | -/-         | 20.1/0.66/60.0  | 7.95/7.38  | 328 | 2016 |
| CNTs/VS <sub>2</sub>                        |          | FTO-g/doctor blading                            | I <sub>3</sub> <sup>-</sup> /I <sup>-</sup> | N719 | 6.83/2.85   | 15.57/0.75/68.2 | 8.02/ 6.49 | 329 | 2017 |
| PPy/MWCNT                                   |          | FTO-g/spin coating & electrochemical deposition | I <sub>3</sub> <sup>-</sup> /I <sup>-</sup> | N719 | -/-         | 17.50/0.76/53.0 | 7.07/-     | 330 | 2017 |
| MoS <sub>2</sub> /CNT                       |          | FTO-g/CVD & electrochemical deposition          | I <sub>3</sub> <sup>-</sup> /I <sup>-</sup> | N719 | 13.52/1.09  | 16.65/0.74/66.0 | 7.83/7.15  | 331 | 2017 |
| Co-Ni/MWCNTs                                |          | FTO-g/spray coating & PLD                       | I <sub>3</sub> <sup>-</sup> /I <sup>-</sup> | N719 | -/-         | 14.68/0.63/72.2 | 6.68/6.22  | 332 | 2017 |
| BCNT                                        |          | ITO-g/drop casting                              | I <sub>3</sub> <sup>-</sup> /I <sup>-</sup> | N719 | -/0.28      | 17.3/0.72/63.0  | 7.91/8.03  | 333 | 2017 |
| CNx/CNT                                     |          | FTO-g/doctor blading                            | I <sub>3</sub> <sup>-</sup> /I <sup>-</sup> | N719 | -/6.15      | 16.30/0.73/61.5 | 7.38/7.13  | 334 | 2017 |
| Ni-NCNTs                                    | 123      | FTO-g/doctor blading                            | I <sub>3</sub> <sup>-</sup> /I <sup>-</sup> | N719 | 13.51/1.30  | 16.64/0.79/68.0 | 8.94/7.53  | 335 | 2017 |
| CoNi@CNTs                                   |          | FTO-g/spin coating                              | I <sub>3</sub> <sup>-</sup> /I <sup>-</sup> | N719 | 7.84/1.38   | 18.3/0.76/65.0  | 9.04/7.88  | 336 | 2017 |
| f-MC/MWCNT                                  | 735.3174 | FTO-g/doctor blading                            | gel electrolyte                             | N719 | 2.7/0.6     | 15.9/0.714/74.2 | 8.42/8.11  | 133 | 2017 |
| N-O-GQD/CNT/CF                              |          | ITO-g/electrophoretic deposition                | I <sub>3</sub> <sup>-</sup> /I <sup>-</sup> | N719 | 1.38/0.30   | 15.77/0.81/60.0 | 7.68/6.90  | 337 | 2017 |
| PANI/GNP/MWCNT                              |          | FTO-g/electrophoretic deposition                | I <sub>3</sub> <sup>-</sup> /I <sup>-</sup> | N719 | -/-         | 18.21/0.78/54.0 | 7.67/7.62  | 338 | 2017 |
| Pt NPs@f-MWCNT                              |          | ITO-g/drop casting                              | I <sub>3</sub> <sup>-</sup> /I <sup>-</sup> | N719 | 11.39/0.12  | 18.59/0.71/63.0 | 8.31/6.59  | 339 | 2017 |
| CuMnSnS <sub>4</sub> /CNT                   |          | FTO-g/doctor blading                            | I <sub>3</sub> <sup>-</sup> /I <sup>-</sup> | N719 | 1.99/1.08   | 16.53/0.75/72.0 | 8.97/8.37  | 340 | 2017 |
| Fe <sub>1-x</sub> S/Fe <sub>3</sub> C-NCNTs | 72.0     | FTO-g/doctor blading                            | I <sub>3</sub> <sup>-</sup> /I <sup>-</sup> | N719 | 12.31/0.78* | 16.19/0.80/67.0 | 8.67/7.75  | 341 | 2018 |
| Ni/MWCNT                                    |          | Ni-foil/spray coating                           | gel electrolyte                             | N719 | 0.42/ 0.12  | 14.7/0.69/73.0  | 7.43/6.72  | 341 | 2018 |
| BCNT                                        |          | -/-                                             | I <sub>3</sub> <sup>-</sup> /I <sup>-</sup> | N719 | -/0.26      | 16.2/0.70/63.0  | 7.17/7.98  | 342 | 2018 |
| MWCNTs                                      |          | FTO-g/drop casting                              | gel electrolyte                             | N719 | -/-         | 23.22/0.58/52.0 | 7.07/5.75  | 343 | 2018 |
| CNT-CoS <sub>2</sub>                        |          | FTO-g/-                                         | I <sub>3</sub> <sup>-</sup> /I <sup>-</sup> | N719 | 4.77/3.22   | 16.51/763/71.0  | 8.92/7.32  | 305 | 2018 |
| CoSe <sub>2</sub> /MWCNTs                   |          | FTO-g/doctor blading                            | I <sub>3</sub> <sup>-</sup> /I <sup>-</sup> | N719 | 2.58/0.97   | 16.61/0.75/70.0 | 8.72/8.14  | 306 | 2018 |

|                                         |        |                      |                                             |      |             |                 |            |     |      |
|-----------------------------------------|--------|----------------------|---------------------------------------------|------|-------------|-----------------|------------|-----|------|
| Co@N-CNT                                |        | FTO-g/spin coating   | I <sub>3</sub> <sup>-</sup> /I <sup>-</sup> | N719 | 8.87/0.11*  | 15.87/0.72/71.1 | 8.18/7.54  | 344 | 2018 |
| CNT-Ni(OH) <sub>2</sub>                 |        | FTO-g/CBD & CVD      | I <sub>3</sub> <sup>-</sup> /I <sup>-</sup> | N719 | 7.95/1.55*  | 15.48/0.71/67.0 | 7.36/6.65  | 345 | 2018 |
| Mo <sub>2</sub> C/NCNTs@Co              | 164    | FTO-g/doctor blading | I <sub>3</sub> <sup>-</sup> /I <sup>-</sup> | N719 | 15.85/1.34* | 17.73/0.78/64.0 | 8.82/7.69  | 307 | 2019 |
| CoTe <sub>2</sub> @NCNTs and            |        | FTO-g/spin coating   | I <sub>3</sub> <sup>-</sup> /I <sup>-</sup> | N719 | 14.83/0.40* | 17.89/0.79/64.0 | 9.02/8.03  | 300 | 2019 |
| MWCNT/PEDOT:PSS                         |        | FTO-g/spin coating   | I <sub>3</sub> <sup>-</sup> /I <sup>-</sup> | -    | -/-         | 13.40/0.80/61.7 | 6.70/7.60  | 346 | 2019 |
| Ni <sub>3</sub> S <sub>2</sub> @MWCNT   | -      | -/-                  | I <sub>3</sub> <sup>-</sup> /I <sup>-</sup> | N719 | 8.01/7.25*  | 17.25/0.75/56.0 | 7.48/7.24  | 347 | 2019 |
| Ni MWCNT                                | 180.85 | FTO-g/doctor blading | I <sub>3</sub> <sup>-</sup> /I <sup>-</sup> | N719 | -/-         | 22.55/0.76/57.0 | 9.72/8.85  | 348 | 2019 |
| MWCNT                                   |        | FTO-g/doctor blading | I <sub>3</sub> <sup>-</sup> /I <sup>-</sup> | N719 | -/-         | 15.40/0.75/62.0 | 7.15/6.33  | 349 | 2019 |
| CoSe@NPC/NCNT                           | 55.6   | FTO-g/doctor blading | I <sub>3</sub> <sup>-</sup> /I <sup>-</sup> | N719 | 10.30/3.56* | 16.00/0.71/67.0 | 7.58/7.27  | 302 | 2019 |
| Ru/MWNT                                 |        | FTO-g/spin coating   | I <sub>3</sub> <sup>-</sup> /I <sup>-</sup> | N719 | -/-         | 12.5/0.83/65.9  | 6.80/6.90  | 350 | 2019 |
| Co <sub>3</sub> O <sub>4</sub> @f-MWCNT |        | FTO-g/doctor blading | I <sub>3</sub> <sup>-</sup> /I <sup>-</sup> | N719 | 2.71/0.15   | 17.09/0.75/65.7 | 8.42/7.81  | 301 | 2019 |
| NiCoP-CNT                               |        | FTO-g/doctor blading | I <sub>3</sub> <sup>-</sup> /I <sup>-</sup> | N719 | 14.01/ 5.41 | 13.94/0.75/68.0 | 7.24/7.12  | 351 | 2019 |
| NiS/CNTs                                |        | FTO-g/-              | I <sub>3</sub> <sup>-</sup> /I <sup>-</sup> | N719 | 5.31/0.28   | 22.87/724/65.0  | 10.82/8.03 | 304 | 2019 |
| ZnS@N.f-MWCNTs                          | 306.24 | FTO-g/doctor blading | I <sub>3</sub> <sup>-</sup> /I <sup>-</sup> | N719 | 2.48/0.1    | 18.12/0.78/66.5 | 9.40/8.20  | 298 | 2020 |

794 Abbreviations: CBD, chemical bath deposition; CVD, chemical vapor deposition; FTO-g, fluorine-doped tin oxide glass; GNP, graphene nanoplatelets; IDO-g, indium tin oxide  
795 glass; MW, multi-walled; PANI, polyaniline; PEDOT:PSS, PPy, poly(3,4-ethylenedioxythiophene) polystyrene sulfonate; polypyrrole; SSA, specific surface area; SW, single-  
796 walled. \*Charge transfer unit is  $\Omega$ ,

### 797 2.2.5. Carbon nanofibers (CNFs) for dye-sensitized solar cells

798 CNFs comprise MWCNTs, where stacked graphene layers are organized as cones, cups,  
799 or plates (**Fig. 18**). Unlike MWCNTs, stacked graphene layers in CNFs are less ordered and  
800 mostly graphitic. Depending upon the CNF type, diameters range from 50–200 nm (almost 10  
801 times larger than MWCNTs), and the walls are thicker compared to CNTs.

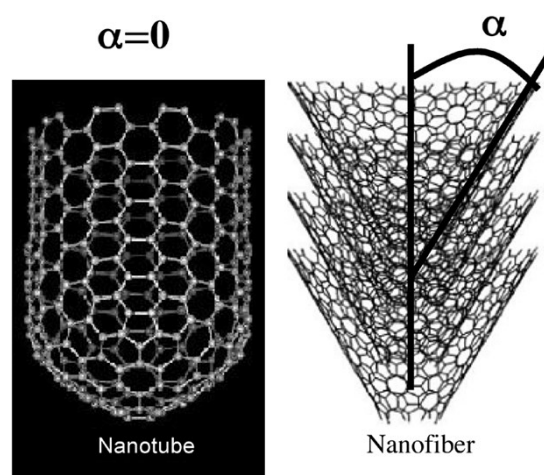

802  
803 **Fig. 18** Structural dissimilarities between carbon nanotubes and carbon nanofibers. Copyright  
804 2007, IOP Publishing; reprinted with permission.<sup>352</sup>

805  
806 CNFs have high mechanical strength, high electrical conductivity, a large surface area,  
807 and high catalytic activity, all of which are almost comparable to CNTs.<sup>352–354</sup> However, the  
808 CNF synthetic process is easier and cheaper compared to CNTs. Hence, CNFs are a hopeful  
809 candidate as a CE for DSSCs.<sup>355</sup> Electrospinning (ES)<sup>356</sup> and vapor deposition, including  
810 catalytic chemical vapor deposition (CCVD),<sup>357</sup> arc discharge,<sup>290</sup> and radio frequency glow  
811 discharges,<sup>358</sup> are usually applied to synthesize CNFs. Among these methods, ES and CCVD  
812 are the most widely used methods to generate CNFs. Joshi *et al.*<sup>355</sup> first employed ES CNFs as  
813 an electrocatalyst and low-cost alternative to Pt for  $I_3^-$  reduction in DSSCs. The CNF CE  
814 exhibits low charge transfer resistance, high capacitance, and fast reaction rates for  $I_3^-$

815 reduction. The CNF-based DSSC reaches an  $\eta$  of 5.5% under one sun illumination. These  
816 authors also noted that the FF and  $\eta$  may be significantly enhanced by using thinner and highly  
817 porous CNFs to reduce the thickness of the CE.

818       The CNF catalytic properties rely on the degree of graphitization, structural defects,  
819 functional heteroatoms, and surface area. Highly graphitic CNFs feature a well-developed  
820 graphene orientation in CNFs structure, and high-temperature heat treatments can considerably  
821 prompt the orientation of the graphene layer and increase the extent of graphitization of CNFs.  
822 Liu and Wang synthesized a flexible CNF mat using alkaline lignin-based solutions containing  
823 poly (vinyl alcohol) via ES (**Fig. 19a–h**).<sup>359</sup> They examined the effect of carbonization  
824 temperature. Notably, graphitizing degree and SSA remarkably increase when carbonization is  
825 performed  $> 1000^{\circ}\text{C}$ . The CNF obtained at  $1500^{\circ}\text{C}$  as binder-free CE in DSSC shows the  
826 maximum PCE (up to 7.60%), comparable to that of the DSSCs with a typical Pt CE (7.67%).  
827 However, the porosity in CNFs decreases the conductivity due to decreasing contact between  
828 the carbon crystalline domain. To increase the catalytic activity and conductivity, Qiu *et al.*  
829 reported coaxial CNFs synthesized from hydrogenated pitch and polyacrylonitrile (PAN) by  
830 ES (**Fig. 19i–m**).<sup>360</sup> Planar aromatic hydro-pitch (HP) molecules are more easily transformed  
831 into an optically anisotropic, graphitizable carbon structure, while PAN forms a carbonaceous  
832 structure with a high N content and abundant defects. Benefiting from the diverse  
833 configuration, their procedure produced a novel coaxial core/shell structure, where HP provides  
834 the core phase structure and PAN yields the outer shell phase. CNFs containing dual phases  
835 show unique characteristics as CEs in DSSCs: The outer shell provides active sites for  
836 catalyzing  $\text{I}_3^-$  reduction and the core phase mediates charge transport.

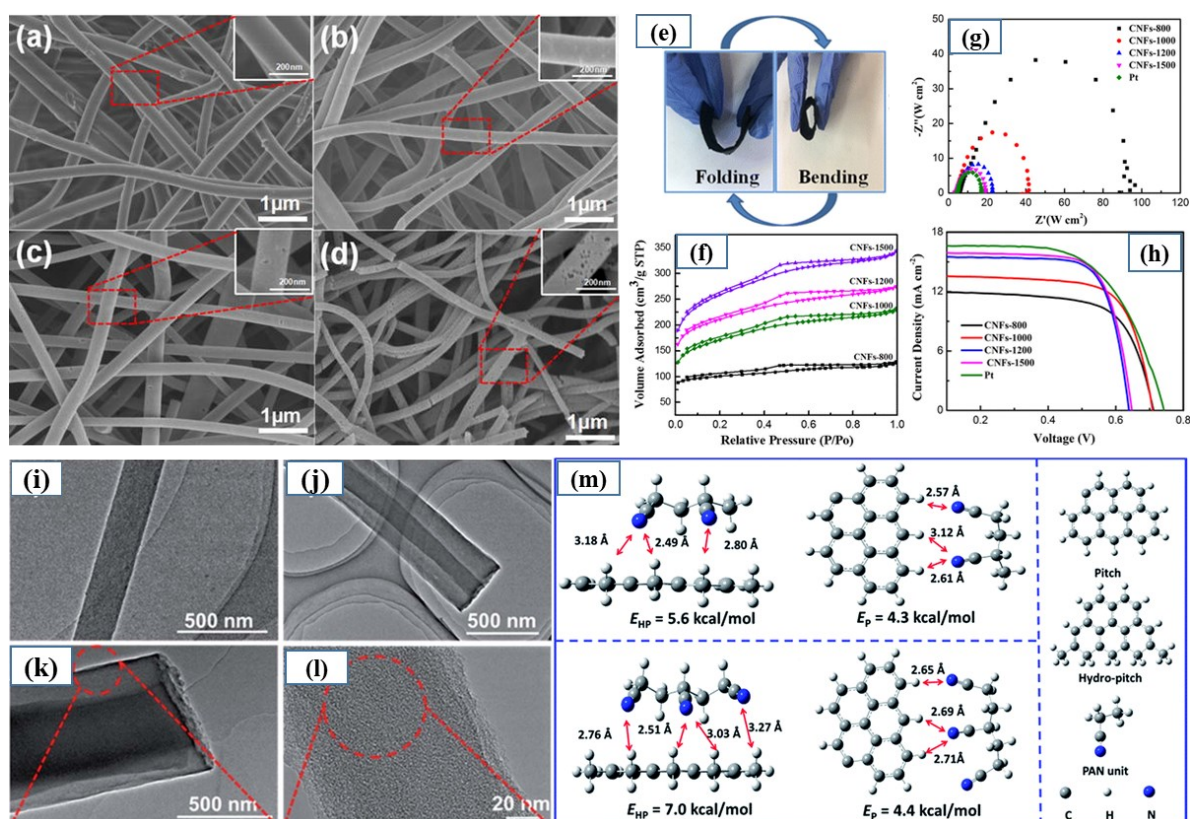

**Fig. 19** Scanning electron microscopy (SEM) images of carbon nanofibers (CNFs) prepared at varying carbonization temperatures: (a) 800°C, (b) 1000°C, (c) 1200°C, and (d) 1500°C. (e) Flexibility of CNF mats. (f) N<sub>2</sub> adsorption/desorption isotherms of different CNFs. (g) Nyquist plots of electrochemical impedance spectroscopy (EIS) for dye-sensitized solar cells (DSSCs) measured at open-circuit voltage under one sun illumination. (h) J-V curves of the DSSCs with different counter electrodes (CEs). Copyright 2018, Springer-Verlag; reprinted with permission.<sup>359</sup> (i-l) Transmission electron microscopy (TEM) images of coaxial CNFs. (m) The three-dimensional arrangements and binding energies between pitch molecules and polyacrylonitrile (PAN) units. Copyright 2018, The Royal Society of Chemistry; reprinted with permission.<sup>360</sup>

CNFs are considered to be one of the best supports for catalytic NPs and polymers due to their low cost, high surface area, thermal and electrical conductivities, and stability. Many

851 researchers have reported that composite CNFs as CEs in DSSCs to increase the catalytic  
852 activity and photovoltaic efficiency.<sup>361–365</sup> Several methodologies have been used to synthesize  
853 CNF-supported catalytic NPs.<sup>366–368</sup> Zhang reported *in situ* synthesis of Co and N-doped carbon  
854 nanofibers (Co-N-CNFs) from PAN and  $\text{Co}(\text{NO}_3)_2 \cdot 6\text{H}_2\text{O}$  via ES (**Fig. 20a–h**).<sup>366</sup> The N-  
855 heteroatom plays a critical role in the nucleation and growth mechanism of metallic NPs,  
856 discussed in the previous section. Furthermore, the N-heteroatom increased the hydrophilic  
857 nature and interaction between Co NPs and the carbon substrate. This factor offers additional  
858 advantages to the catalytic behavior of Co-N-CNFs. DSSCs fabricated using Co-N-CNFs-  
859 based CE display a high PCE of 9.05% at one sun illumination, which is significantly higher  
860 than that of the most commonly used Pt CE (7.1%).

861 Transition metal sulfides are considered to be a proficient alternative to valuable Pt metals  
862 due to their low cost, exceptional redox properties, and high conductivity. High catalytic  
863 activity of transition metal sulfides are expected because of their high SSAs and unique  
864 structures, as well as their similar electronic properties with Pt. Recently, Wu *et al.* prepared  
865 flower-like nanosheet molybdenum sulfide on carbon nanofibers ( $\text{MoS}_2/\text{CNFs}$ ) via  
866 impregnation of Mo and S precursor into the CNFs, followed by hydrothermal synthesis of  
867  $\text{MoS}_2$  (**Fig. 20i–p**).<sup>369</sup> The  $\text{MoS}_2/\text{CNF}$  composites exhibit good performance as a CE in a  
868 DSSC. A DSSC with  $\text{MoS}_2/\text{CNF}$  CEs delivers a PCE of 8.46%, which is even higher than that  
869 of the DSSC with CNF CE (6.59%) or Pt CE (7.65%) in the identical conditions.

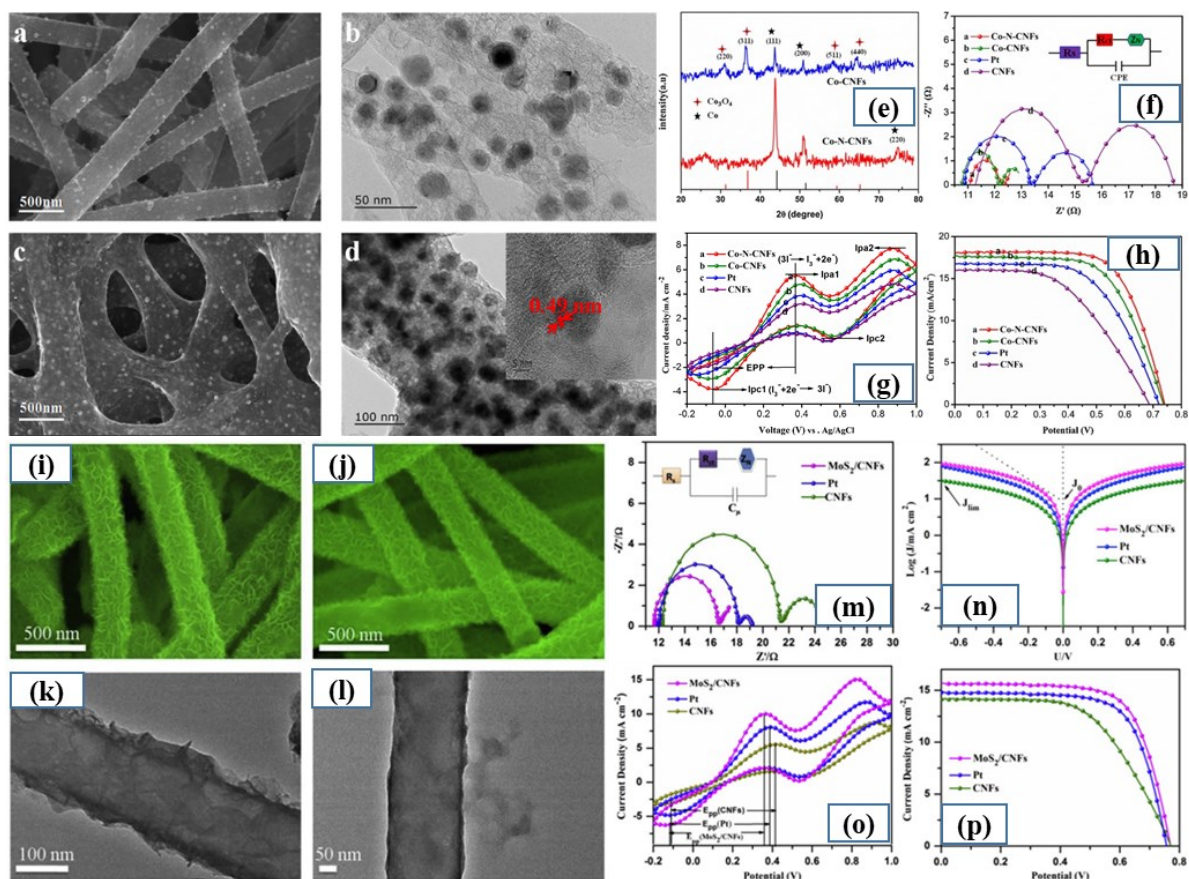

870

871 **Fig. 20** (a) Scanning electron microscopy (SEM) and (b) transmission electron microscopy  
 872 (TEM) images of cobalt- and nitrogen-doped carbon nanofiber (Co-CNF) composite. (c) SEM  
 873 and (d) TEM images of Co-N-CNF composite (inset: high-resolution lattice pattern of Co). (e)  
 874 X-ray diffraction (XRD) patterns of the Co-CNFs and Co-N-CNFs. (f) Electrochemical  
 875 impedance spectroscopy (EIS) Nyquist plots of the symmetrical cells. (g) CV and (h) J-V  
 876 curves of dye-sensitized solar cells (DSSCs) fabricated with different counter electrodes (CEs).  
 877 Copyright 2019, Elsevier; reprinted with permission.<sup>366</sup> (i, j) Field emission (FE)-SEM images  
 878 of MoS<sub>2</sub>/CNFs with flower-like morphologies, (k, l) High resolution (HR)-TEM images of  
 879 MoS<sub>2</sub>/CNFs composites. (m) Nyquist and (n) Tafel plots of symmetrical cells, (o) CV of  
 880 different CEs, and (p) J-V curve of the DSSCs using the obtained CEs. Copyright 2018,  
 881 Elsevier; reprinted with permission.<sup>369</sup>

882

883 The mechanical strength of CNFs is similar—but slightly lower—compared to CNTs. This  
 884 lower mechanical strength is due to the irregular organization of the graphene layers. The  
 885 strength of CNFs can reach 12 GPa (and even up to 30 GPa); therefore, CNFs have also been  
 886 explored to fabricate flexible and fiber-shaped DSSCs.<sup>362,370–372</sup> Zou prepared  
 887  $\text{CoNi}_2\text{S}_4$  nanoribbon and nanorod on carbon fibers and used them as CEs in fiber-shaped dye-  
 888 sensitized solar cells (FDSSCs) (**Fig. 21**).<sup>368</sup>  $\text{CoNi}_2\text{S}_4$  nanoribbon-CF-based FDSSC show a  
 889 high PCE of 7.03%, which is superior to the Pt wire CE (6.45%). Notably, the  
 890  $\text{CoNi}_2\text{S}_4$  nanorod-CF-based DSSC show a PCE of 4.10%. The higher conversion efficiency of  
 891  $\text{CoNi}_2\text{S}_4$  nanoribbon-CF-based FDSSC compared to nanorod-CF-based FDSSC is due to their  
 892 intrinsic properties as well as their different morphological structure. The unique open crystal  
 893 facet likely contributes to the noteworthy difference in PCE when compared to two 1D  
 894  $\text{CoNi}_2\text{S}_4$  nanostructures. The detailed information of graphene CEs and their electrocatalytic  
 895 and photovoltaic properties in DSSCs are summarized in **Table 7**.  
 896

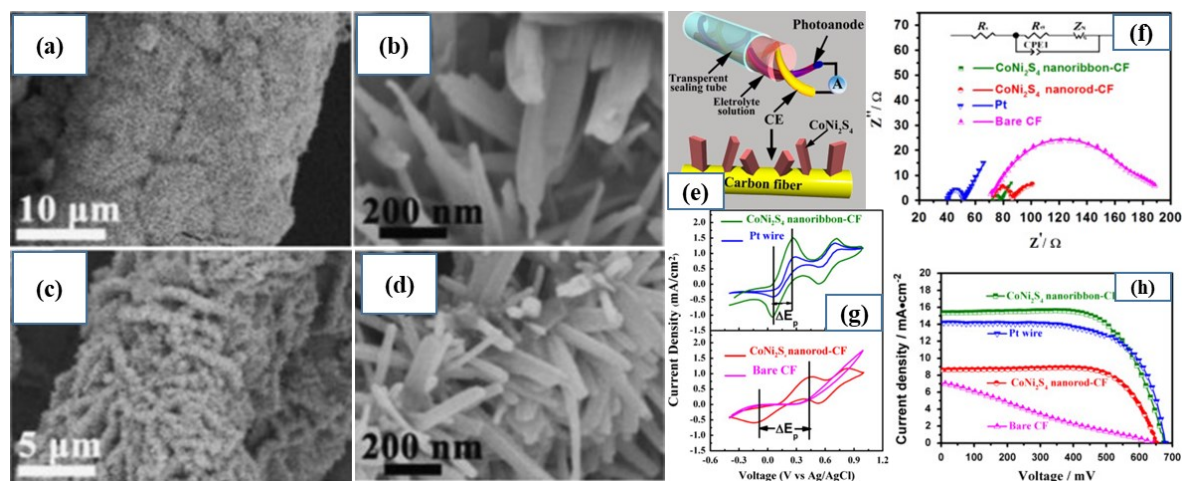

898 **Fig. 21** Field emission scanning electron microscopy (FE-SEM) images of (a, b)  $\text{CoNi}_2\text{S}_4$   
 899 nanoribbon and (c, d) for  $\text{CoNi}_2\text{S}_4$  nanorod at different magnifications. (e) Schematic structure  
 900 of the fiber-shaped dye-sensitized solar cell (FDSSC). (f) Nyquist plots of the symmetric cells.

901 (e) CV curves and (h) J-V curves of FDSSCs based on different counter electrodes. Copyright  
902 2015, Elsevier; reprinted with permission.<sup>369</sup>

903 **Table 7** Carbon nanofiber (CNF) counter electrodes (CEs) and their electrocatalytic and photovoltaic properties in dye-sensitized solar cells.

| CE materials                          | Precursor/SSA<br>(m <sup>2</sup> g <sup>-1</sup> ) | Substrate/coating<br>technology | Redox couple                                | Sensitizer | $R_s/R_{ct}$<br>( $\Omega$ cm <sup>2</sup> ) | $J_{sc}/V_{oc}/FF$<br>(mA cm <sup>-2</sup> /V/%) | $\eta^{CE}/\eta^{Pt}$<br>(%) | Ref | Year |
|---------------------------------------|----------------------------------------------------|---------------------------------|---------------------------------------------|------------|----------------------------------------------|--------------------------------------------------|------------------------------|-----|------|
| CNF                                   | Acetylene/156                                      | FTO-g/doctor blading            | I <sub>3</sub> <sup>-</sup> /I <sup>-</sup> | N3         | -/1.1                                        | 15.51/0.70/62.0                                  | 6.74/7.25                    | 373 | 2016 |
| PCNF                                  | Lignin & PVA/941                                   | FTO-g/spray coating             | I <sub>3</sub> <sup>-</sup> /I <sup>-</sup> | N719       | -/-                                          | 15.94/0.65/73.0                                  | 7.60/7.67                    | 359 | 2018 |
| PCNF                                  | hydro-pitch (HP) &<br>PAN/560                      | FTO-g/doctor blading            | I <sub>3</sub> <sup>-</sup> /I <sup>-</sup> | N719       | -/-                                          | 14.16/0.76/65.0                                  | 6.92/6.34                    | 360 | 2018 |
| G-CNF/Pt                              | PAN/-                                              | FTO-g/spin coating              | I <sub>3</sub> <sup>-</sup> /I <sup>-</sup> | N719       | 3.16/0.12                                    | 18.57/0.78/67.0                                  | 9.70/8.63                    | 242 | 2015 |
| Pt/CNF                                | Commercial/-                                       | FTO-g/spray coating             | Co <sup>3+</sup> /Co <sup>2+</sup>          | YD2-o-C8   | 11.65/1.60                                   | 15.52/0.85/68.0                                  | 8.97/9.41                    | 365 | 2015 |
| Pt/CNF                                | Commercial/-                                       | FTO-g/spray coating             | I <sub>3</sub> <sup>-</sup> /I <sup>-</sup> | N719       | 11.79/1.56                                   | 14.44/0.79/65.0                                  | 7.40/7.88                    | 365 | 2015 |
| CoNi <sub>2</sub> S <sub>4</sub> -CNF | Commercial/8.61                                    | Directly                        | I <sub>3</sub> <sup>-</sup> /I <sup>-</sup> | N719       | 36.3/2.55                                    | 15.3/0.68/67.7                                   | 7.03/6.45                    | 368 | 2015 |
| CNF/Pt                                | PAN/-                                              | FTO-g/spray coating             | I <sub>3</sub> <sup>-</sup> /I <sup>-</sup> | N719       | 1.03/0.52                                    | 13.33/0.83/68.8                                  | 7.6/7.4                      | 367 | 2015 |
| Co <sub>3</sub> S <sub>4</sub> /CNF   | PAN/26.07                                          | FTO-g/spray coating             | Co <sup>3+</sup> /Co <sup>2+</sup>          | YD2-o-C8   | 10.05/1.2                                    | 16.57/0.77/72.0                                  | 9.23/8.38                    | 374 | 2016 |
| Pt/CNF                                | PVA/-                                              | FTO-g/doctor blading            | I <sub>3</sub> <sup>-</sup> /I <sup>-</sup> | N719       | 3.76/1.20                                    | 13.15/0.80/66.0                                  | 6.94/7.29                    | 375 | 2016 |
| Mo-Pt <sub>3</sub> Ni/CNF             | PAN/-                                              | FTO-g/spray coating             | I <sub>3</sub> <sup>-</sup> /I <sup>-</sup> | N719       | -/-                                          | 16.94/0.774/72.3                                 | 9.47/7.1                     | 376 | 2016 |
| p-GN@CuInS <sub>2</sub> /CNF          | PAN/ 814                                           | FTO-g/doctor blading            | I <sub>3</sub> <sup>-</sup> /I <sup>-</sup> | N719       | 9.71/0.81 <sup>†</sup>                       | 17.53/0.69/59.81                                 | 7.23/6.34                    | 377 | 2016 |
| Cr-Pt <sub>3</sub> Ni/CNF             | PAN/-                                              | FTO-g/spray coating             | I <sub>3</sub> <sup>-</sup> /I <sup>-</sup> | N719       | 7.65/1.22                                    | 17.53/0.69/59.81                                 | 7.23/ 6.34                   | 377 | 2016 |
| G/CNF-Ni                              | PAN/-                                              | FTO-g/spray coating             | I <sub>3</sub> <sup>-</sup> /I <sup>-</sup> | N719       | 4.23/0.72                                    | 14.31/0.84/ 60.0                                 | 7.14/ 7.59                   | 377 | 2016 |
| MnO <sub>2</sub> /CNF                 | PAN/-                                              | FTO-g/spray coating             | I <sub>3</sub> <sup>-</sup> /I <sup>-</sup> | N719       | 4.53/1.62                                    | 16.15/0.78/70.0                                  | 8.86/ 8.27                   | 378 | 2017 |
| Co <sub>9</sub> S <sub>8</sub> /CNF   | PAN/-                                              | FTO-g/doctor blading            | I <sub>3</sub> <sup>-</sup> /I <sup>-</sup> | N719       | -/-                                          | 23.91/0.68/51.8                                  | 8.37/8.50                    | 379 | 2018 |
| MoS <sub>2</sub> /CNF                 | PAN/-                                              | FTO-g/spray coating             | I <sub>3</sub> <sup>-</sup> /I <sup>-</sup> | N719       | 5.85/2.50                                    | 15.64/0.77/70.2                                  | 8.46/7.65                    | 380 | 2018 |
| MoO <sub>2</sub> /CNF                 | PAN/-                                              | FTO-g/spray coating             | I <sub>3</sub> <sup>-</sup> /I <sup>-</sup> | N719       | 8.4/0.65 <sup>†</sup>                        | 21.12/0.722/50.0                                 | 7.60/7.34                    | 380 | 2018 |
| Re-Pt <sub>3</sub> Ni/CNF             | PAN/-                                              | FTO-g/spray coating             | I <sub>3</sub> <sup>-</sup> /I <sup>-</sup> | N719       | 16.81/0.77 <sup>†</sup>                      | 16.81/0.77/0.72                                  | 9.36/7.33                    | 381 | 2018 |

|                                       |                          |                     |                                             |      |           |                  |           |                |      |
|---------------------------------------|--------------------------|---------------------|---------------------------------------------|------|-----------|------------------|-----------|----------------|------|
| Fe <sub>2</sub> O <sub>3</sub> /CNF   | PAN/290.7                | FTO-g/spray coating | I <sub>3</sub> <sup>-</sup> /I <sup>-</sup> | N719 | 4.61/0.42 | 16.61/0.72/62.0  | 7.41/6.94 | <sup>382</sup> | 2019 |
| Ni <sub>3</sub> S <sub>4</sub> @C/CNF | PAN, Glucose & Urea/75.4 | FTO-g/spray coating | I <sub>3</sub> <sup>-</sup> /I <sup>-</sup> | N719 | 6.00/1.65 | 15.41/0.77/70.0  | 8.29/7.35 | <sup>383</sup> | 2019 |
| Pt-Ni <sub>2</sub> P-CNF              | PAN/-                    | FTO-g/spray coating | I <sub>3</sub> <sup>-</sup> /I <sup>-</sup> | N719 | 7.65/1.09 | 16.30/ 0.78/72.0 | 9.11/7.84 | <sup>384</sup> | 2019 |
| Co/N-CNF                              | PAN, PVP & Urea/-        | FTO-g/spray coating | I <sub>3</sub> <sup>-</sup> /I <sup>-</sup> | N719 | 5.65/0.64 | 18.02/0.74/68.0  | 9.05/7.10 | <sup>366</sup> | 2019 |

904 Abbreviations: FTO-g, fluorine-doped titanium oxide glass; PAN, polyacrylonitrile; SSA, specific surface area. <sup>†</sup>Charge transfer unit is  $\Omega$  cm

### 3. Perovskite Solar Cells (PSCs)

#### 3.1. Working principle of Perovskite Solar Cells

Perovskite materials present excellent light absorption; they are derived from calcium titanate ( $\text{CaTiO}_3$ ). The perovskite material can be described by the formula  $\text{AMX}_3$ , where A is an organic or inorganic cation (MA= methylammonium, FA = formamidinium, and Cs = cesium), M is a metal cation (such as lead [Pb], tin [Sn], or mixtures thereof)—with smaller size than that of the A cation—and X is generally a halogen anion (such as Cl, bromine [Br], iodine [I], or mixtures thereof). The perovskite crystal structure is depicted in **Fig. 22**. PSCs have experienced rapid development: the PCE has increased from 3.8 to 25.2% within 11 years<sup>385</sup>, mainly due to the following advantageous features: 1) perovskites exhibit broad spectral absorption<sup>386,387</sup> from visible to near-infrared; and 2) perovskite materials possess a high absorption coefficient,<sup>388,389</sup> high charge carrier mobilities,<sup>390</sup> long carrier diffusion lengths,<sup>391,392</sup> and small exciton binding energy.<sup>393</sup>

The general operating principles of PSCs are illustrated in **Fig. 22**. When incident light is irradiated to the perovskite layer through a transparent substrate (indium tin oxide [ITO] or FTO glass), photons with an energy greater than the forbidden band width of the perovskite can excite the electrons from the valence band to the conduction band, generating electron-hole pairs in the perovskite film. Then, the hole and electron are separated and transferred from the perovskite to the hole transporting materials (HTMs) and electron transporting materials (ETMs) simultaneously (**Fig. 22c**). The injected electrons diffuse through the ETM and reach the BE to complete the circuit, where they combine with diffuse holes at the BE. Furthermore, undesired reactions, such as exciton annihilation, non-radiative recombination and the recombination of holes and electrons at

the three interfaces (ETM/perovskite, perovskite/HTM and ETM/HTM), reduce the efficiency of the device.

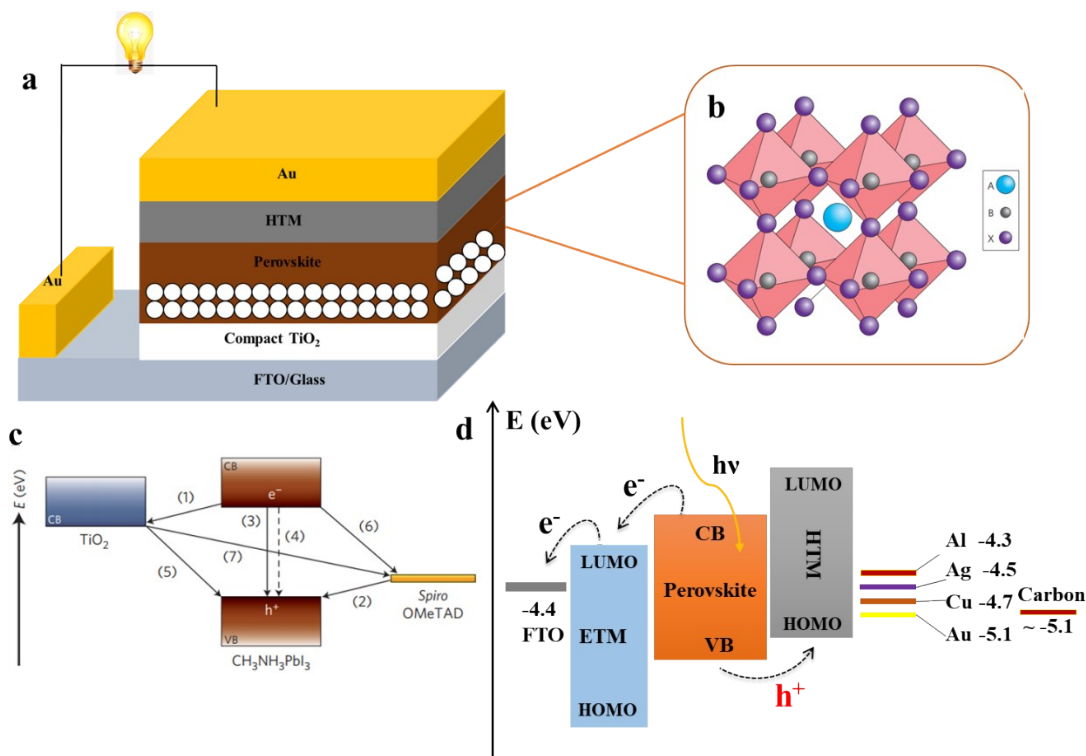

**Fig. 22** a) A schematic of perovskite solar cell (PSC) architecture. b) The crystal structure of perovskite film. c) A schematic diagram of the energy levels and electron transfer processes in a HTM/perovskite/TiO<sub>2</sub> cell. d) An energy level diagram of related materials in PSCs that vary in the back electrode.

### 3.2 Back electrodes (BEs) for PSCs

The BE in a PSC plays a vital role in hole extraction and collection process from the valence band (VB) of perovskite layer or the HOMO of the HTM to the BE. In contrast to a CE in a DSSC, a BEs in a PSC does not require electrocatalytic activity. However, a BE requires a suitable WF for better energy level alignment and hole collection from the

perovskite layer or the HOMO of the HTM. Furthermore, a BE's electric conductivity and film morphology should also be seriously considered to reduce the series resistance and make a good physical contact in the interface of perovskite/BE layers, which are crucial for the photovoltaic performance of device. Currently, the most widely used BEs in state-of-the-art PSCs are noble metals, such as Au and Ag. These metals possess a low sheet resistance ( $R_{sq}$ ) as well as high light reflectivity. However, Ag reacts with the iodide ions in the perovskite layer to generate AgX, which degrades perovskite film.<sup>394–396</sup> On the other hand, Au BEs usually faces metal migration through the HTM into perovskite films. This phenomenon leads to the dramatic performance degradation of the devices.<sup>397–399</sup> These Au and Ag drawbacks will hamper the scalable commercialization and long-term stability of PSCs.

Al has a low WF of 4.3 eV and is typically used as a BE in inverted PSCs. However, Al exhibits high constraints as a PSC electrode due to its high reduced power originating from its comparatively low standard reduction potential of -1.66 V. Zhao *et al.* employed *in situ* X-ray diffraction (XRD) to show that  $Al^0$  can reduce  $Pb^+$  to  $Pb^0$  in  $H_2O$  and dimethylformamide (DMF) even without the requirement of oxygen or light, and thus convert  $TiO_2/Al_2O_3/carbon$  ( $MAPbI_3$ ) to  $(CH_3NH_3)_4PbI_6 \cdot 2H_2O$  and later methylammonium iodide (MAI).<sup>400</sup> In addition, some alternative non-metal BEs have already been developed for PSCs, including carbon and the polymer poly(3,4-ethylenedioxythiophene) polystyrene sulfonate (PEDOT:PSS). To replace the expensive metal electrode, various carbon BEs have been developed as alternatives; they present excellent function due to their hydrophobic features, suitable electronic properties, and excellent chemical and thermal stability.<sup>401</sup> In the following section, we comprehensively

illustrate and emphasize the development of various carbons as alternative BEs to metal electrodes (Ag, Al, and Au). We present the characteristics of different carbon BEs, their fabrication methods, and the performance of devices with carbon-based BEs. We hope that this review will give researchers more insights into non-metal carbon BEs for PSCs and their contribution to boost future PSC commercialization.

### **3.3. Carbon BEs for PSCs**

Carbon materials are abundant, low cost, and have high electrical conductivity, chemical stability, diversity, and modifiability.<sup>402</sup> They usually have a WF of 5.0 eV, which is close to that of Au (5.1 eV). Hence, they can be potential BEs for PSC. Carbon pastes (usually a composite of graphite and CB), CNTs, or graphene have been used in carbon-based PSCs.<sup>403</sup>

#### **3.3.1. Carbon pastes for PSCs**

Carbon pastes composed of graphite and CB are the earliest and most popular carbon materials used in PSC devices. So far, there are two main device configurations for the carbon pastes as PSC BE applications (**Fig. 23**). One architectural design consists of a mesoporous triple layer with an insulator space layer, also known as meso-PSC (**Fig. 23a**). In this device, before the deposition of the perovskite layer, an ETM of mesoporous TiO<sub>2</sub>, an insulator spacer layer (ZrO<sub>2</sub> or Al<sub>2</sub>O<sub>3</sub>), and a mesoporous carbon BE layer are sequentially deposited. The obtained scaffold is then processed at a high temperature to improve the adhesion and physical contact of the assembled layers. Finally, the perovskite film is formed via the infiltration of perovskite precursor solution through the mesoporous triple layer of TiO<sub>2</sub>/ZrO<sub>2</sub>/carbon. The insulating ZrO<sub>2</sub> layer prohibits direct contact of carbon with the TiO<sub>2</sub> layer. In this architecture, various parameters may affect perovskite

precursor infiltration, such as the size of graphite, CB, the thickness, and even the morphology of carbon film, as well as the related parameters of insulating spacer layer ( $\text{ZrO}_2$ ). Hence, these parameters should be thoughtfully considered.

A conventional type PSC represents another design architecture (**Fig. 23b**); it excludes the insulating spacer layer. The carbon electrode is deposited onto top of the perovskite film; thus, the carbon film should be processed at low temperature to avoid the thermal degradation of the perovskite film. Additionally, the processing solvent for the carbon paste should not damage the under perovskite film. Therefore, the following aspects should be seriously considered when employing carbon paste for conventional PSCs; (i) processing temperature; (ii) processing solvent for carbon paste; (iii) deposition method; (iv) the WF of the carbon film, to enable efficient hole extraction and collection; and (v) the conductivity of carbon film.

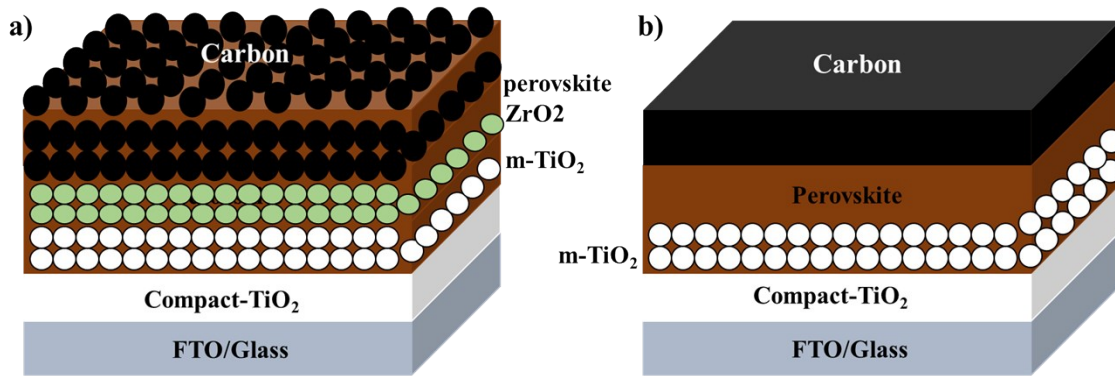

**Fig. 23.** A schematic structure of device configurations for a carbon back electrode (BE)–based perovskite solar cell (PSC). a) A triple mesoporous layer containing an insulator spacer layer ( $\text{ZrO}_2$  or  $\text{Al}_2\text{O}_3$ ). b) A conventional HTM-free carbon BE–based PSC.

### 3.3.1.1. Device configuration with mesoporous triple layers including an insulator space layer

For the mesoporous triple layer C-PSC device configuration, an insulating layer of  $\text{ZrO}_2$ ,<sup>404,405</sup>  $\text{Al}_2\text{O}_3$ ,<sup>406</sup> or  $\text{SiO}_2$ <sup>407</sup> is required to be inserted between the  $\text{TiO}_2$  and carbon layer. This insulating layer plays a vital role to prevent the ETM from making direct physical contact with the CB electrode. The carbon paste is finally deposited on the top of the FTO substrate/compact  $\text{TiO}_2$ /mesoporous- $\text{TiO}_2$ / $\text{ZrO}_2$  or  $\text{Al}_2\text{O}_3$  insulating layer. In addition, the  $\text{TiO}_2$ /insulator layer ( $\text{ZrO}_2$  or  $\text{Al}_2\text{O}_3$ )/ mesoporous carbon layer serve as the scaffold to support the deposition of perovskite light absorbing layer by the infiltration-drying-crystallization process.<sup>407–413</sup>

Generally, carbon paste electrodes employ CB and graphite as the main components. They are usually applied in mesoporous triple layer with insulator layer type PSCs due to the mesoporous character. Graphite is the vital component with regard to determining the porosity and conductivity of a CB electrode. In 2014, Han *et al.* first investigated the effect of graphite size in the CB/graphite BE on the device performance of HTM-free mesoscopic PSCs.<sup>414</sup> They demonstrated that an 8  $\mu\text{m}$  graphite carbon BE possessing a larger pore size is beneficial for the filling of perovskite precursors through the mesoporous carbon layer. Meanwhile, the conductivity characterization results indicated that 8  $\mu\text{m}$  graphite carbon BE exhibits a smaller  $R_{\text{sq}}$  (square resistance) and, hence, a higher PCE up to 11.65%, with a FF value of 0.72, compared with other graphite size-based devices (**Fig. 24a–h**).

Increasing the conductivity of carbon BEs can help lower the series resistance of the device; this endeavor increases the FF value of a PSC. The introduction of functional

additives of acetic acid and titanium(IV) isopropoxide to carbon paste prior to the ball milling process increase the conductivity.<sup>415</sup> The electrical conductivity of this newly developed carbon film is up to  $1.13 \times 10^4 \text{ Sm}^{-1}$  due to the *in situ* generation of newly complex polymeric Ti–O–Ti species that act as a binder and plasticizer. Thus, a PSC based on a carbon paste BE treated by acetic acid and titanium(IV) isopropoxide achieves a high efficiency of 14.04%.

Heteroatom doping of carbons has been widely used for CNTs<sup>416</sup> and graphene.<sup>417,418</sup> Furthermore, the hole extraction ability and a WF of carbon BE are crucial for HTM-free carbon-based PSCs (C-PSCs).<sup>419</sup> Thus, doping the graphite with heteroatoms may be a feasible strategy for tuning the WF and conductivity of a graphite-based BE.<sup>420,421</sup> One study doped graphite with B by a ball milling process of graphite powder with a 5% mass ratio of boron carbide ( $\text{B}_4\text{C}$ ) followed carbonization at  $900^\circ\text{C}$  for 2 h prior to the graphitization. This process increases the WF and enhances conductivity due to higher graphitization.<sup>39</sup> Thus, the hole extraction from perovskite to the carbon electrode is facilitated, leading to much improved efficiency from 12.4% for the pristine graphite BE-based PSC to 13.6% for the boron-doped BE-based PSC due to an improved open-circuit voltage and FF. In another study, oxygen-rich carbon black (ORC), which has a high oxygen content, elevates the WF of a BE and improves the interface contact between carbon BE and perovskite layer.<sup>422</sup> When combined with the p-type characteristic of ORC, the hole extraction from perovskite to a ORC BE is considerably enhanced. Thus, an HTM-free C-PSC based on ORC BE exhibits a higher  $V_{\text{OC}}$  of 980 mV compared to an oxygen-deficient carbon black (ODC)-based device with a  $V_{\text{OC}}$  of 880mV (**Fig. 24i–k**).

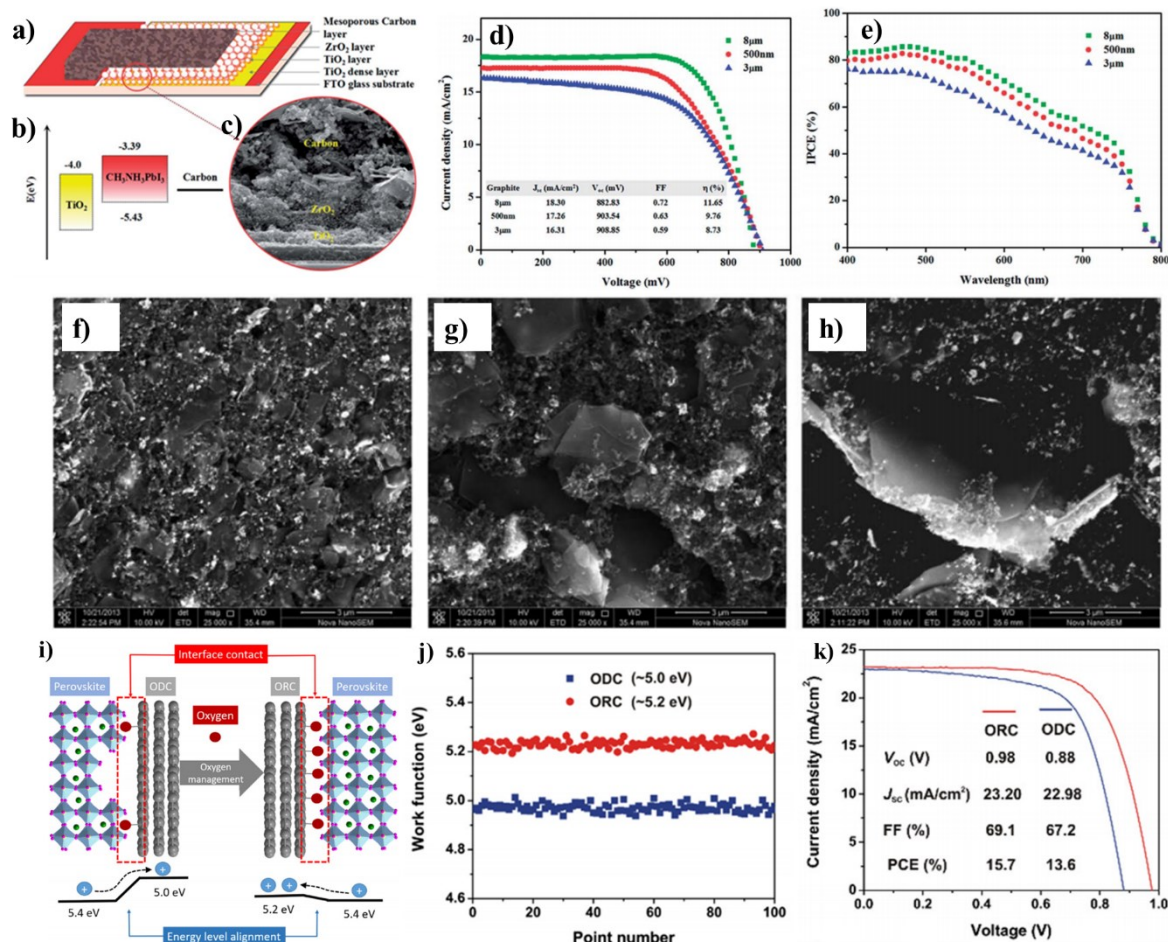

**Fig. 24** a) The schematic structure of a carbon back electrode (BE)-based perovskite solar cell (PSC). b) The energy level diagram of related components in device. c) A cross-sectional scanning electron microscopy (SEM) image of a PSC. d) J-V curves of carbon BE-based PSC with different graphite sizes. e) The corresponding IPCE curves. f-h) Surface SEM images of carbon BE with different graphite particle sizes: 500 nm, 3 mm, and 8 mm, respectively. Copyright 2015, The Royal Society of Chemistry; reprinted with permission.<sup>414</sup> i) Schematic illustration of oxygen-deficient carbon black (ODC) and oxygen-rich carbon black (ORC) film, interfacial contact, and energy level alignment of perovskite/carbon. j) Work function curves of ODC and ORC film. k) J-V curves of C-

Based on the features of triple mesoporous layer device structure, the penetration of perovskite solution through carbon and  $\text{ZrO}_2$  films to reach the ETM is crucial. The main role of the insulating spacer layer for C-PSCs is to separate the ETM and carbon BE, and thus prevent the electrons in the ETM from being transported to the carbon electrode. To improve the separating property of the insulating layer and ensure high performance in C-PSCs, many factors should be considered: the particle size of the insulating spacer layer, film morphology, a wide bandgap of the spacer layer, the thickness of the insulating layer and interfacial contact of the perovskite/ $\text{ZrO}_2$  (or  $\text{Al}_2\text{O}_3$ ).<sup>405,409,423,424</sup> A device without a  $\text{ZrO}_2$  spacer layer shows rather poor device performance, delivering a PCE of only 1.56% because the electrons in the  $\text{TiO}_2$  may directly leak to the carbon BE. The efficiency improves markedly to 5.92% in the presence of 0.3  $\mu\text{m}$   $\text{ZrO}_2$ , and it further increases to 10.3% when inserting a 1  $\mu\text{m}$   $\text{ZrO}_2$  film. However, a very thick  $\text{ZrO}_2$  layer may limit the carrier diffusion length and decrease the device efficiency.<sup>391,392</sup> Han *et al.*<sup>425</sup> systematically investigated the spacer layer parameters of design points for the triple mesoporous layer structures of C-PSCs. They proposed that an efficient spacer layer for C-PSCs should possess the following features: a) pore size > 100 nm, b) high porosity, and c) excellent insulating property with an ultra-thin film thickness.

Zhou *et al.*<sup>407</sup> investigated  $\text{SiO}_2$  paste as a low cost insulating layer to replace  $\text{ZrO}_2$ . With this replacement, the PCE is 13.09%, which is comparable to a device with a  $\text{ZrO}_2$  spacer layer. Furthermore, the PCE of devices without encapsulation decreases from the

initial value of 13.09% to the final value 12.33% after storage under ambient air conditions for 104 days (50–70% relative humidity). The authors mainly attributed this loss to the thick and condensed carbon films providing a heavy barrier against air ( $\text{H}_2\text{O}/\text{O}_2$ ) as well as the chemical stability of  $\text{SiO}_2$  paste.

Inserting a P-type layer ( $\text{NiO}$ <sup>410</sup> or  $\text{WO}_3$ <sup>426,427</sup>) between the insulating layer and carbon film is also an efficient way to improve photovoltaic performance because it reduces carrier recombination and benefits the hole extraction rate. In 2015, Wang *et al.* employed  $\text{NiO}/\text{Al}_2\text{O}_3$  as a spacer layer to prevent the direct contact of  $\text{TiO}_2$  and carbon BE in  $\text{MAPbI}_3$ -based C-PSCs.<sup>410</sup> The presence of an  $\text{NiO}$  layer between  $\text{Al}_2\text{O}_3$  and the carbon BE significantly improves the  $J_{\text{sc}}$  value from  $17.59 \text{ mA cm}^{-2}$  for the parent  $\text{TiO}_2/\text{Al}_2\text{O}_3/\text{carbon}$  ( $\text{MAPbI}_3$ )-based device to  $21.62 \text{ mA cm}^{-2}$  for the  $\text{TiO}_2/\text{Al}_2\text{O}_3/\text{NiO}/\text{carbon}$  ( $\text{MAPbI}_3$ )-based device (**Fig. 25a–c**). Moreover, the  $\text{NiO}$ -containing device provides a higher  $V_{\text{oc}}$  value of 915 mV, compared to 896 mV for the parent device without the  $\text{NiO}$  layer, due to the reduced charge carrier recombination. This outcome is attributed to the dual roles of the spacer layer as well as the HTM. The PCE of the device with the  $\text{NiO}$  layer is markedly higher (15.03%) compared to that of the device without  $\text{NiO}$  (11.2%). Considering the appropriate position of the  $\text{WO}_3$  conduction band, Bhandari *et al.* incorporated p-type inorganic  $\text{WO}_3$  nanoparticle into the carbon BE to promote hole extraction at the perovskite/carbon interface for C-PSCs.<sup>426,427</sup> It was found that the device performance can be significantly influenced depending on the amount of incorporated  $\text{WO}_3$  additive into the carbon BE. The optimal amount of  $\text{WO}_3$  additive by volume (7.5%) gives the highest device PCE (10.3%), compared to 7.4% for the control device without  $\text{WO}_3$  additive.

Compared to conventional HTM-based PSCs, recombination at the interfaces of ETM/perovskite and perovskite/BE, where the generated electrons recombine with holes, is a more serious issue in HTM-free C-PSCs due to the direct contact of carbon and  $\text{TiO}_2$ .<sup>428,429</sup> Therefore, the  $V_{\text{OC}}$  value of C-PSCs are usually lower compared to conventional HTM-based PSCs. To avoid the recombination at the interfaces of ETM/perovskite and perovskite/BE is crucial to increase the  $V_{\text{OC}}$  value of C-PSCs. Surface modification of ETMs by insulating materials, such as  $\text{MgO}$ ,<sup>430</sup>  $\text{Al}_2\text{O}_3$ ,<sup>431,432</sup> or  $\text{La}_2\text{O}_3$ ,<sup>433</sup> suppresses the charge recombination and enhances the  $V_{\text{OC}}$  of devices in conventional PSCs. Similarly, the surface modification of the mesoporous  $\text{TiO}_2$  by inserting an additional ultrathin  $\text{Al}_2\text{O}_3$  layer with a  $\text{ZrO}_2$  spacer layer increases the efficiency—due to minor charge recombination—and thus enhances the  $V_{\text{OC}}$  of the device (**Fig. 25d–f**).<sup>434</sup> Furthermore, inserting a thin  $\text{Al}_2\text{O}_3$  insulating layer is favored to reduce the expensive  $\text{ZrO}_2$  spacer layer without a loss of efficiency.<sup>435</sup>

From the aspect of perovskite composition engineering, partially substituting the MA cation with a 5-AVA group,<sup>411</sup> or replacing the anion of  $\text{I}^-$  with  $\text{BF}_4^-$ ,<sup>436</sup> or introducing a triple cation to the perovskite film can help to deposit a high quality perovskite film with low defect concentrations and improve carrier transport. These factors lead to better device performance. The incorporation of 5-AVA to perovskite precursor decreases defect concentrations and improve pore filling via the formation of linear hydrogen-bonded chains between  $\text{COOH}$  and  $\text{NH}_3^+$  groups from 5-AVA and  $\text{I}^-$  ions from the  $\text{PbI}_6$  octahedron. Thus, a  $(5\text{-AVA})_x(\text{MA})_{1-x}\text{PbI}_3$ -based PSC shows a significantly improved efficiency (up to 11.6%) compared to 7.2% for a  $\text{MAPbI}_3$ -based device. Besides, a  $(5\text{-AVA})_x(\text{MA})_{1-x}\text{PbI}_3$ -based device exhibits long-term stability ( $> 1000$  h) under full sunlight in ambient air (**Fig.**

**25g–i).** Based on the same device configuration, partially substituting I<sup>−</sup> of perovskite with BF<sub>4</sub><sup>−</sup> markedly improves efficiency from 10.54% to 13.24% due to enhanced charge transport and reduced charge recombination (**Fig. 25j–l**).<sup>436</sup> Using triple cation perovskite Cs<sub>0.05</sub>(FA<sub>0.4</sub>MA<sub>0.6</sub>)<sub>0.95</sub>PbI<sub>2.8</sub>Br<sub>0.2</sub> as a light absorber material—instead of MAPbI<sub>3</sub>—demonstrated that the presence of Cs in perovskite layer can extend the carrier diffusion length (electron diffusion lengths of 140 nm and hole diffusion lengths of 1.9 μm). These alterations benefit charge transport in mesoporous layers.<sup>437</sup> Therefore, PSCs based on Cs<sub>0.05</sub>(FA<sub>0.4</sub>MA<sub>0.6</sub>)<sub>0.95</sub>PbI<sub>2.8</sub>Br<sub>0.2</sub> show a PCE of 17.02%, with a J<sub>SC</sub> of 23.4 mA/cm<sup>2</sup>, a V<sub>OC</sub> of 1.008 V, and a FF of 0.72. Meanwhile, a devices based on the Cs doped triple cation exhibited excellent stability, with a retention of > 90% initial PCE after stored in dark conditions at 85°C for 1020 h.

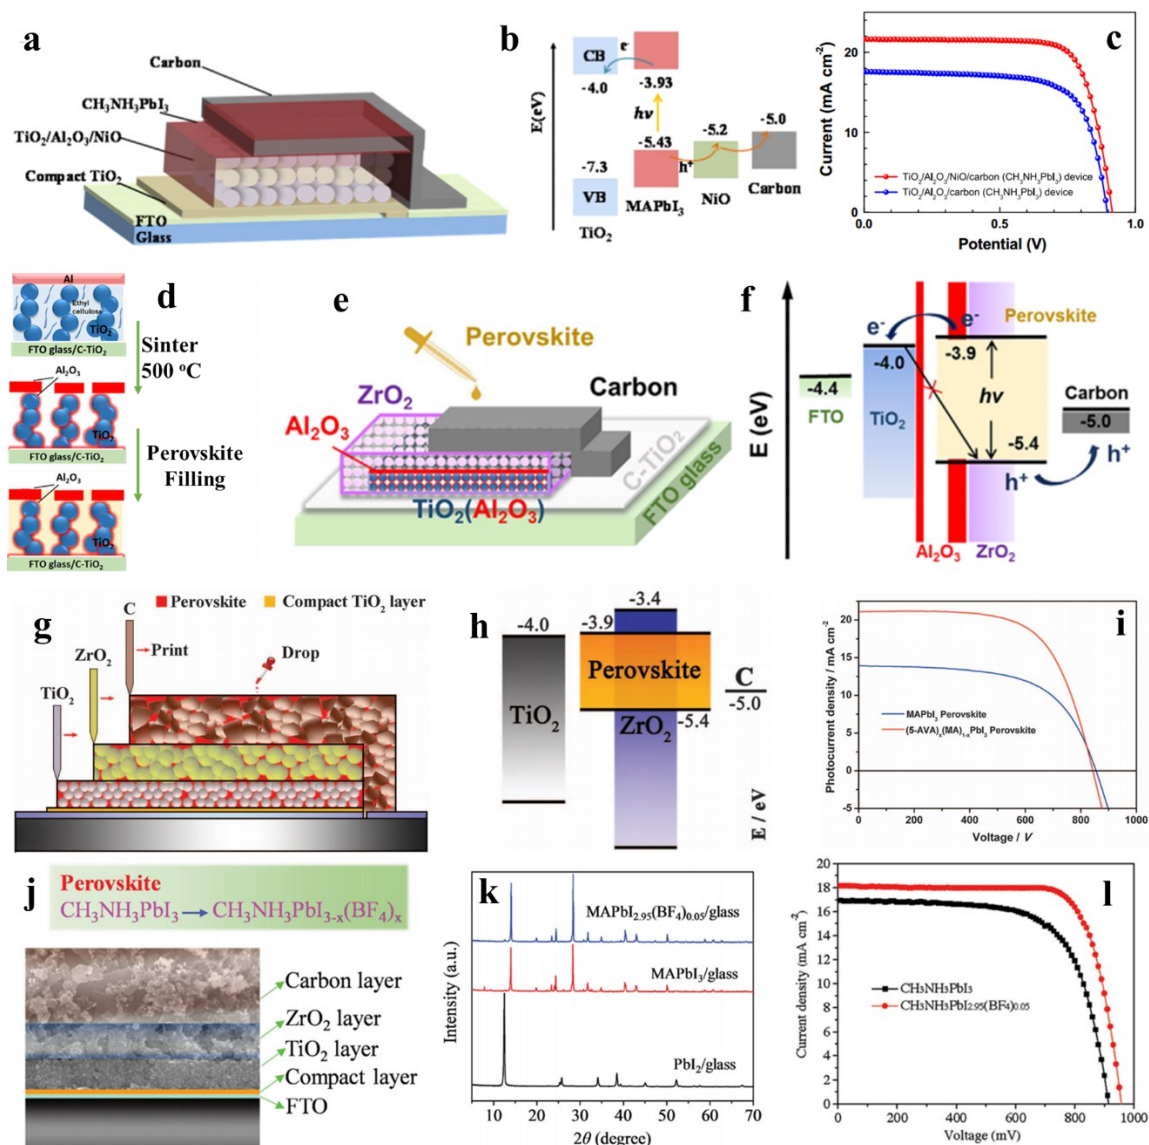

**Fig. 25** (a) Configuration of a fluorine-doped tin oxide (FTO)/c-TiO<sub>2</sub>/m-TiO<sub>2</sub>/Al<sub>2</sub>O<sub>3</sub>/NiO/carbon (MAPbI<sub>3</sub>) device. (b) An energy level diagram of the corresponding carbon-based perovskite solar cell (C-PSC). (c) J-V curves for champion devices of TiO<sub>2</sub>/Al<sub>2</sub>O<sub>3</sub>/NiO/carbon (MAPbI<sub>3</sub>) configuration and regular TiO<sub>2</sub>/Al<sub>2</sub>O<sub>3</sub>/carbon (MAPbI<sub>3</sub>) (blue squares). Copyright 2015, Elsevier; reprinted with permission.<sup>410</sup>. (d) Formation process of a bifunctional Al<sub>2</sub>O<sub>3</sub> interlayer. (e) Device structure of hole-conductor-free C-PSCs with an Al<sub>2</sub>O<sub>3</sub> interlayer and (f) the corresponding

energy band diagram. Copyright 2018, WILEY-VCH; reprinted with permission.<sup>434</sup> (g) Schematic configuration of an FTO/c-TiO<sub>2</sub>/m-TiO<sub>2</sub>/ZrO<sub>2</sub>/C/perovskite mesoscopic solar cell prepared by printing process. (h) Energy level diagram of the related materials. (i) J-V curves of (5-AVA)<sub>x</sub>(MA)<sub>1-x</sub>PbI<sub>3</sub> (red curve) and MAPbI<sub>3</sub>-based PSCs measured under one sun simulation. Reprinted with permission.<sup>411</sup> Copyright 2014, American Association for the Advancement of Science. (j) Structure of a mesoporous C-PSC device. (k) X-ray diffraction (XRD) spectra of PbI<sub>2</sub>/glass, MAPbI<sub>3</sub>/glass, and MAPbI<sub>2.95</sub>(BF<sub>4</sub>)<sub>0.05</sub>/glass devices. (l) J-V curve of C-PSCs based on different perovskite composition. Copyright 2016, WILEY-VCH; reprinted with permission.<sup>436</sup>

Zhang *et al.*<sup>438</sup> pre-passivated the triple mesoporous layer of TiO<sub>2</sub>/ZrO<sub>2</sub>/C by dipping the mesoporous triple layer scaffold into a 0.2 mM PbI<sub>2</sub> solution in DMF for 30 min at room temperature. They then rinsed the triple layer scaffold in DMF to get rid of loosely bound PbI<sub>2</sub>. X-ray photoelectron spectroscopy (XPS) characterization showed the formation of C–O–Pb linkages via the reaction of –OH on the carbon surface with PbI<sub>2</sub>. The PCE of the pre-passivated device significantly improves to 7.3% compared to the device without pretreatment of PbI<sub>2</sub> by one-step method for perovskite deposition (2.21%). This increased efficiency is due to the reduced carrier recombination.

Investigation on the precursor solvent showed that an optimized DMF/dimethyl sulfoxide (DMSO) ratio (0.93:0.07, v/v) provides better wettability and excellent perovskite film quality because of a suitable compromise between the solvent's polarity and viscosity.<sup>439</sup> The device based on this optimal solvent has a PCE of 13.89% due to the improved light harvesting ability and the enhanced charge separation of the perovskite

(**Fig. 26a–c**). Additives, like guanidinium chloride (GuCl), improve the quality of the  $\text{CH}_3\text{NH}_3\text{PbI}_3$  perovskite absorber and suppress recombination in the device (**Fig. 26d**).<sup>440</sup> The suppressed recombination at the  $\text{TiO}_2$ /perovskite interface is considered due to the exchange hydrogen-bonding interaction between  $-\text{C}(\text{NH}_2)_3^+$  and halide ions (from  $\text{N}-\text{H}\cdots\text{Cl}^-$  to  $\text{N}-\text{H}\cdots\text{I}^-$ ). The three  $-\text{NH}_2$  groups in GuCl may increase the linking of the neighboring  $\text{MAPbI}_3$ , thus helping the crystal growth in contact with each other more tightly (**Fig. 26e–j**). A device with pristine  $\text{MAPbI}_3$  shows a PCE of 9.10% with a  $V_{\text{OC}}$  of 0.88 V, a  $J_{\text{SC}}$  of  $15.10 \text{ mA cm}^{-2}$ , a FF of 0.68. The device fabricated with  $\text{MAPbI}_3 \cdot x\text{GuCl}$  presents a much higher PCE of 14.35% and  $V_{\text{OC}}$  of 1.00 V, and an enhanced  $J_{\text{SC}}$  of  $19.31 \text{ mA cm}^{-2}$  and a FF of 0.743.

The perovskite layer is sensitive and unstable when exposed to water and moisture, ultraviolet light, and thermal stress.<sup>441–443</sup> Beyond PSC degradation due to the poor perovskite layer stability, device instability can be also accelerated by the instability of the other layers in the full device. For example, the dopants used in organic HTM layer are hydrophilic and, consequently, reduce device stability.<sup>444,445</sup> Thus, it is crucial to improve the stability of the perovskite layer, HTM, and BE to ensure the full device is stable. Rong *et al.* carried out moisture-induced transformation of perovskite crystals in a triple-layer scaffold of  $\text{TiO}_2/\text{ZrO}_2/\text{carbon}$  to fabricate printable mesoscopic solar cells. The employed ammonium chloride ( $\text{NH}_4\text{Cl}$ ) as an additive to assist the perovskite crystallization, wherein the formation and transition of intermediate  $\text{CH}_3\text{NH}_3\text{X} \cdot \text{NH}_4\text{PbX}_3(\text{H}_2\text{O})_2$  ( $\text{X}=\text{I}$  or  $\text{Cl}$ ) enables high-quality perovskite  $\text{CH}_3\text{NH}_3\text{PbI}_3$  crystals with a preferential growth orientation (**Fig. 26k, l**). A device based on  $\text{CH}_3\text{NH}_3\text{PbI}_3$  achieves an average PCE of 13.92%, with a champion efficiency of 15.60% and a lifetime of over 130 days in ambient

air with 35% relative humidity. This design and strategy suggest promising prospects for further mass production of perovskite-based photovoltaics and will significantly promote the development of perovskite-based photovoltaics.<sup>446</sup>

In 2017, Nazeeruddin *et al.* prepared triple mesoporous layer structure carbon electrode-based PSCs that are stable for 1 year by the combination of incorporation of moisture stable 2D perovskite layer and HTM-free carbon-based BE (**Fig. 26m, n**).<sup>31</sup> This ultra-stability is due to the use of mixed perovskites—2D perovskite (5-AVA)<sub>2</sub>PbI<sub>4</sub> and 3D perovskite CH<sub>3</sub>NH<sub>3</sub>PbI<sub>3</sub>—which form a 2D/3D interface in the devices. The 10 × 10 cm<sup>2</sup> PSC solar modules prepared via a fully printable industrial-scale process show 11.2% efficiency and the device stability for > 10,000 h with zero loss in efficiency measured under controlled standard conditions. **Table 8** shows the summary information of carbon-based perovskite solar cells with device structure of TiO<sub>2</sub>/insulating spacer layer/carbon past/perovskite.

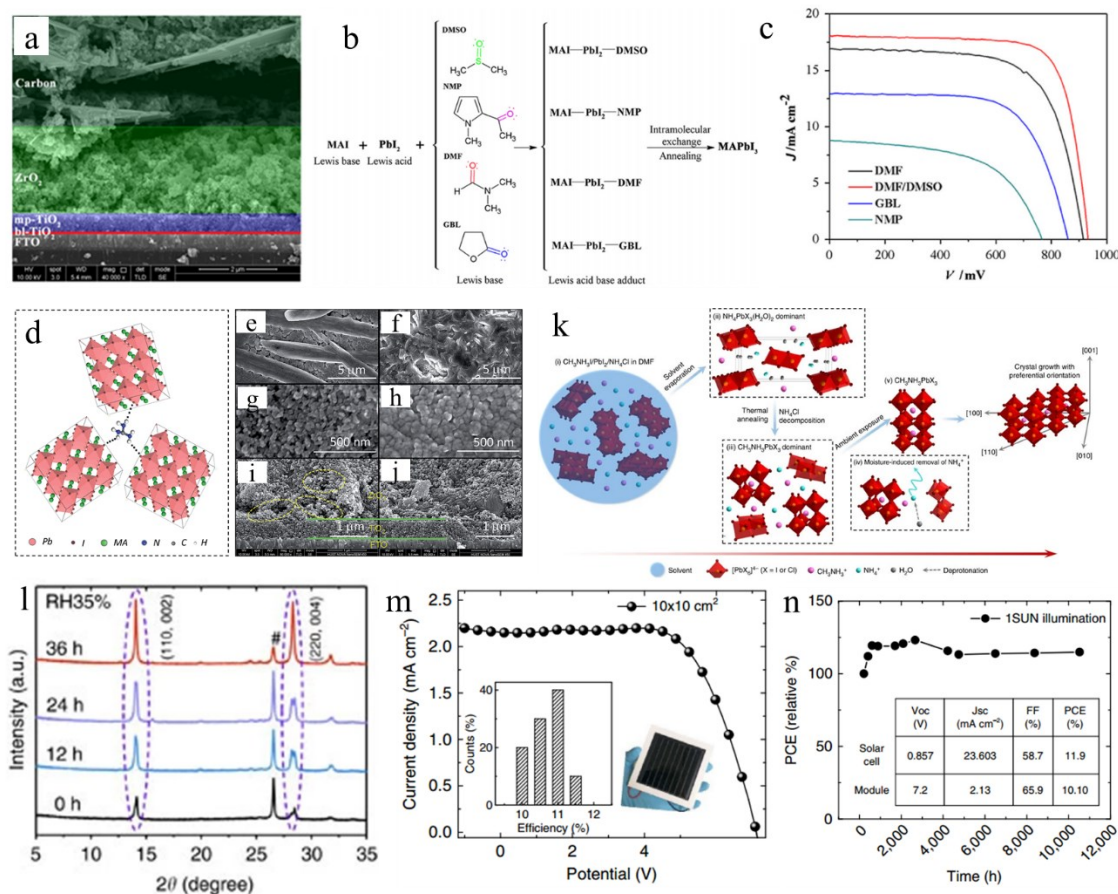

**Fig. 26** (a) A cross-sectional scanning electron microscopy (SEM) image of a practical carbon-based perovskite solar cell (C-PSC). (b) The formation process of an intermediate phase and MAPbI<sub>3</sub> film from dimethyl sulfoxide (DMSO), dimethylformamide (DMF), gamma butyrolactone (GBL), and *N*-Methyl-2-pyrrolidone (NMP) as the solvent for the perovskite precursor. (c) J-V curves of C-PSCs based on various solvents. Copyright 2016, Elsevier; reprinted with permission.<sup>439</sup> (d) Schematic illustration of three neighboring grain structures cross-linked by hydrogen-bonding interactions (N–H···I) of the iodide with the ammonium end groups of guanidinium chloride (GuCl) species. (e and f) Surface SEM images of MAPbI<sub>3</sub> and MAPbI<sub>3</sub>·*x*GuCl films on fluorine-doped tin oxide (FTO) substrates. (g and h) Surface SEM images of MAPbI<sub>3</sub> and MAPbI<sub>3</sub>·*x*GuCl (*x* = 0.25) infiltrated

mesoporous  $\text{TiO}_2$  films. (i and j) Cross sectional SEM images of the mesoporous scaffold ( $\text{TiO}_2/\text{ZrO}_2$ ) infiltrated with  $\text{MAPbI}_3$  and  $\text{MAPbI}_3 \cdot x\text{GuCl}$  ( $x = 0.25$ ). Copyright 2017, The Royal Society of Chemistry; reprinted with permission.<sup>440</sup> (k) Schematic view of the crystal growth process of perovskite  $\text{CH}_3\text{NH}_3\text{PbX}_3$  in the presence of ammonium and moisture. (l) X-ray diffraction patterns of intermediate infiltrated in  $\text{TiO}_2/\text{ZrO}_2$ /carbon triple layer during ambient exposure (RH35% for 36 h). Copyright 2017, Nature Publishing Group; reprinted with permission.<sup>446</sup> (m) J-V curve using two-dimensional (2D)/three-dimensional (3D) perovskite with 3% AVAI in a hole transporting material (HTM)-free  $10 \times 10 \text{ cm}^2$  module. (n) Typical module stability test under one sun AM 1.5 G conditions at a stabilized temperature of  $55^\circ\text{C}$  and short circuit conditions. Copyright 2017, Nature Publishing Group; reprinted with permission.<sup>31</sup>

**Table 8** Summary of photovoltaic parameters for carbon-based perovskite solar cells with device structure of TiO<sub>2</sub>/insulating spacer layer/carbon past/perovskite.

| Device configuration                                                                                                                | Deposition method | Thermal Treatment | $V_{oc}$ (mV) | $J_{sc}$ (mA cm <sup>-2</sup> ) | FF   | $\eta$ (%) | Ref. |
|-------------------------------------------------------------------------------------------------------------------------------------|-------------------|-------------------|---------------|---------------------------------|------|------------|------|
| FTO/c-TiO <sub>2</sub> /m-TiO <sub>2</sub> /0- $\mu$ m ZrO <sub>2</sub> /Carbon/MAPbI <sub>3</sub>                                  | Screen-printing   | 400°C/30 min      | 0.59          | 7.03                            | 0.37 | 1.56       | 405  |
| FTO/c-TiO <sub>2</sub> /m-TiO <sub>2</sub> /0.3- $\mu$ m ZrO <sub>2</sub> /Carbon/MAPbI <sub>3</sub>                                | Screen-printing   | 400°C/30 min      | 0.79          | 11.52                           | 0.64 | 5.92       | 405  |
| FTO/c-TiO <sub>2</sub> /m-TiO <sub>2</sub> /0.5- $\mu$ m ZrO <sub>2</sub> /Carbon/MAPbI <sub>3</sub>                                | Screen-printing   | 400°C/30 min      | 0.85          | 15.74                           | 0.67 | 9.02       | 405  |
| FTO/c-TiO <sub>2</sub> /m-TiO <sub>2</sub> /1- $\mu$ m ZrO <sub>2</sub> /Carbon/MAPbI <sub>3</sub>                                  | Screen-printing   | 400°C/30 min      | 0.9           | 17.42                           | 0.66 | 10.30      | 405  |
| FTO/c-TiO <sub>2</sub> /m-TiO <sub>2</sub> /1.4- $\mu$ m ZrO <sub>2</sub> /Carbon/MAPbI <sub>3</sub>                                | Screen-printing   | 400°C/30 min      | 0.85          | 19.60                           | 0.55 | 9.29       | 405  |
| FTO/c-TiO <sub>2</sub> /m-TiO <sub>2</sub> /m-Al <sub>2</sub> O <sub>3</sub> /0-nm NiO/Carbon/MAPbI <sub>3</sub>                    | blade-coating     | 400°C/30 min      | 815           | 16.11                           | 0.66 | 8.67       | 410  |
| FTO/c-TiO <sub>2</sub> /m-TiO <sub>2</sub> /m-Al <sub>2</sub> O <sub>3</sub> /400-nm NiO/Carbon/MAPbI <sub>3</sub>                  | blade-coating     | 400°C/30 min      | 902           | 18.19                           | 0.71 | 11.65      | 410  |
| FTO/c-TiO <sub>2</sub> /m-TiO <sub>2</sub> /m-Al <sub>2</sub> O <sub>3</sub> /600-nm NiO/Carbon/MAPbI <sub>3</sub>                  | blade-coating     | 400°C/30 min      | 904           | 18.99                           | 0.70 | 12.01      | 410  |
| FTO/c-TiO <sub>2</sub> /m-TiO <sub>2</sub> /m-Al <sub>2</sub> O <sub>3</sub> /800-nm NiO/Carbon/MAPbI <sub>3</sub>                  | blade-coating     | 400°C/30 min      | 923           | 20.14                           | 0.72 | 13.39      | 410  |
| FTO/c-TiO <sub>2</sub> /m-TiO <sub>2</sub> /m-Al <sub>2</sub> O <sub>3</sub> /1200-nm NiO/Carbon/MAPbI <sub>3</sub>                 | blade-coating     | 400°C/30 min      | 915           | 19.35                           | 0.71 | 12.57      | 410  |
| FTO/c-TiO <sub>2</sub> /m-TiO <sub>2</sub> /ZrO <sub>2</sub> /Carbon/No PbI <sub>2</sub> pretreatment/MAPbI <sub>3</sub> (one-step) | Screen-printing   | 100°C/15 min      | 740           | 4.91                            | 0.60 | 2.21       | 438  |

|                                                                                                                                                                   |                 |              |       |       |           |       |     |
|-------------------------------------------------------------------------------------------------------------------------------------------------------------------|-----------------|--------------|-------|-------|-----------|-------|-----|
| FTO/c-TiO <sub>2</sub> /m-TiO <sub>2</sub> /ZrO <sub>2</sub> /Carbon/PbI <sub>2</sub> pretreatment/MAPbI <sub>3</sub> (one-step)                                  | Screen-printing | 100°C/15 min | 900   | 13.38 | 0.54      | 6.55  | 438 |
| FTO/c-TiO <sub>2</sub> /m-TiO <sub>2</sub> /ZrO <sub>2</sub> /Carbon/No PbI <sub>2</sub> pretreatment/MAPbI <sub>3</sub> (two-step)                               | Screen-printing | 100°C/15 min | 910   | 14.51 | 0.54      | 7.08  | 438 |
| FTO/c-TiO <sub>2</sub> /m-TiO <sub>2</sub> /ZrO <sub>2</sub> /Carbon/PbI <sub>2</sub> pretreatment/MAPbI <sub>3</sub> (two-step)                                  | Screen-printing | 100°C/15 min | 930   | 15.32 | 0.51      | 7.30  | 438 |
| FTO/c-TiO <sub>2</sub> /m-TiO <sub>2</sub> /m-Al <sub>2</sub> O <sub>3</sub> /Carbon (0% WO <sub>3</sub> additive) /MAPbI <sub>3</sub>                            | Screen-printing | 450°C/30 min | 788.8 | 15.16 | 0.62      | 7.40  | 426 |
| FTO/c-TiO <sub>2</sub> /m-TiO <sub>2</sub> /m-Al <sub>2</sub> O <sub>3</sub> /Carbon (containing 5% WO <sub>3</sub> additive) /MAPbI <sub>3</sub>                 | Screen-printing | 450°C/30 min | 801.3 | 16.4  | 0.60<br>5 | 7.95  | 426 |
| FTO/c-TiO <sub>2</sub> /m-TiO <sub>2</sub> /m-Al <sub>2</sub> O <sub>3</sub> /Carbon (containing 7.5% WO <sub>3</sub> additive) /MAPbI <sub>3</sub>               | Screen-printing | 450°C/30 min | 842.3 | 21.1  | 0.58      | 10.30 | 426 |
| FTO/c-TiO <sub>2</sub> /m-TiO <sub>2</sub> /m-Al <sub>2</sub> O <sub>3</sub> /Carbon (containing 10% WO <sub>3</sub> additive)/MAPbI <sub>3</sub>                 | Screen-printing | 450°C/30 min | 840.4 | 19.3  | 0.56      | 9.15  | 426 |
| FTO/c-TiO <sub>2</sub> /m-TiO <sub>2</sub> /ZrO <sub>2</sub> /Carbon black & 500 nm size of graphite /MAPbI <sub>3</sub> (two-step)                               | Screen-printing | 400°C/30 min | 903.5 | 17.26 | 0.63      | 9.76  | 414 |
| FTO/c-TiO <sub>2</sub> /m-TiO <sub>2</sub> /ZrO <sub>2</sub> /Carbon black & 3 μm size of graphite/MAPbI <sub>3</sub> (two-step)                                  | Screen-printing | 400°C/30 min | 908.9 | 16.31 | 0.59      | 8.73  | 414 |
| FTO/c-TiO <sub>2</sub> /m-TiO <sub>2</sub> /ZrO <sub>2</sub> /Carbon black & 8 μm size of graphite /MAPbI <sub>3</sub> (two-step)                                 | Screen-printing | 400°C/30 min | 882.8 | 18.30 | 0.72      | 11.65 | 414 |
| FTO/c-TiO <sub>2</sub> /m-TiO <sub>2</sub> /ZrO <sub>2</sub> /Carbon/(5-AVA) <sub>x</sub> MA <sub>1-x</sub> PbI <sub>3</sub> with formamide additive in precursor | Screen-printing | 400°C/40 min | 930   | 23.7  | 0.69      | 15.21 | 447 |
| FTO/c-TiO <sub>2</sub> /m-TiO <sub>2</sub> /ZrO <sub>2</sub> /Carbon/(5-AVA) <sub>x</sub> MA <sub>1-x</sub> PbI <sub>3</sub> with acetamide additive in precursor | Screen-printing | 400°C/40 min | 930   | 23.69 | 0.71      | 15.51 | 447 |
| FTO/c-TiO <sub>2</sub> /m-TiO <sub>2</sub> /ZrO <sub>2</sub> /Carbon/(5-AVA) <sub>x</sub> MA <sub>1-x</sub> PbI <sub>3</sub> with urea additive in precursor      | Screen-printing | 400°C/40 min | 920   | 23.63 | 0.69      | 15.07 | 447 |
| FTO/c-TiO <sub>2</sub> /m-TiO <sub>2</sub> /ZrO <sub>2</sub> /Carbon/(5-AVA) <sub>x</sub> MA <sub>1-x</sub> PbI <sub>3</sub> (control)                            | Screen-printing | 400°C/40 min | 900   | 23.53 | 0.67      | 14.26 | 447 |
| FTO/c-TiO <sub>2</sub> /m-TiO <sub>2</sub> /ZrO <sub>2</sub> /Carbon/MAPbI <sub>3</sub>                                                                           | Screen-printing | 400°C/30 min | 855   | 13.9  | 0.61      | 7.2   | 448 |

|                                                                                                                                                                                |                 |              |     |       |      |       |     |
|--------------------------------------------------------------------------------------------------------------------------------------------------------------------------------|-----------------|--------------|-----|-------|------|-------|-----|
| FTO/c-TiO <sub>2</sub> /m-TiO <sub>2</sub> /ZrO <sub>2</sub> /Carbon/ (5-AVA) <sub>x</sub> MA <sub>1-x</sub> PbI <sub>3</sub>                                                  | Screen-printing | 400°C/30 min | 843 | 21.1  | 0.65 | 11.6  | 448 |
| FTO/c-TiO <sub>2</sub> /m-TiO <sub>2</sub> /ZrO <sub>2</sub> /Carbon/MAPbI <sub>3</sub>                                                                                        | Screen-printing | 400°C/30 min | 914 | 16.92 | 0.68 | 10.54 | 436 |
| FTO/c-TiO <sub>2</sub> /m-TiO <sub>2</sub> /ZrO <sub>2</sub> /Carbon/MAPbI <sub>2.95</sub> (BF <sub>4</sub> ) <sub>0.05</sub>                                                  | Screen-printing | 400°C/30 min | 957 | 18.15 | 0.76 | 13.24 | 436 |
| FTO/c-TiO <sub>2</sub> /m-TiO <sub>2</sub> /ZrO <sub>2</sub> /Carbon/MAPbI <sub>3</sub> /precursor solvent:DMF                                                                 | Screen-printing | 400°C/30 min | 914 | 16.92 | 0.68 | 10.54 | 439 |
| FTO/c-TiO <sub>2</sub> /m-TiO <sub>2</sub> /ZrO <sub>2</sub> /Carbon/MAPbI <sub>3</sub> /precursor solvent:DMF/DMSO                                                            | Screen-printing | 400°C/30 min | 932 | 18.07 | 0.76 | 12.79 | 439 |
| FTO/c-TiO <sub>2</sub> /m-TiO <sub>2</sub> /ZrO <sub>2</sub> /Carbon/MAPbI <sub>3</sub> /precursor solvent:GBL                                                                 | Screen-printing | 400°C/30 min | 859 | 12.93 | 0.67 | 7.47  | 439 |
| FTO/c-TiO <sub>2</sub> /m-TiO <sub>2</sub> /ZrO <sub>2</sub> /Carbon/MAPbI <sub>3</sub> /precursor solvent:NMP                                                                 | Screen-printing | 400°C/30 min | 766 | 8.78  | 0.56 | 3.77  | 439 |
| FTO/c-TiO <sub>2</sub> /m-TiO <sub>2</sub> /super thin Al <sub>2</sub> O <sub>3</sub> /ZrO <sub>2</sub> /Carbon/ MA <sub>0.965</sub> (5-AVA) <sub>0.035</sub> PbI <sub>3</sub> | Screen-printing | -            | 900 | 22.81 | 0.70 | 14.39 | 435 |
| FTO/c-TiO <sub>2</sub> /m-TiO <sub>2</sub> /No ZrO <sub>2</sub> /Carbon/ (5-AVA) <sub>x</sub> MA <sub>1-x</sub> PbI <sub>3</sub>                                               | Screen-printing | 400°C/30 min | 605 | 16.21 | 0.66 | 6.52  | 425 |
| FTO/c-TiO <sub>2</sub> /m-TiO <sub>2</sub> /5 nm size of ZrO <sub>2</sub> /Carbon/ (5-AVA) <sub>x</sub> MA <sub>1-x</sub> PbI <sub>3</sub>                                     | Screen-printing | 400°C/30 min | 871 | 16.06 | 0.67 | 9.42  | 425 |
| FTO/c-TiO <sub>2</sub> /m-TiO <sub>2</sub> /10 nm size of ZrO <sub>2</sub> /Carbon/ (5-AVA) <sub>x</sub> MA <sub>1-x</sub> PbI <sub>3</sub>                                    | Screen-printing | 400°C/30 min | 908 | 18.26 | 0.71 | 11.77 | 425 |
| FTO/c-TiO <sub>2</sub> /m-TiO <sub>2</sub> /20 nm size of ZrO <sub>2</sub> /Carbon/ (5-AVA) <sub>x</sub> MA <sub>1-x</sub> PbI <sub>3</sub>                                    | Screen-printing | 400°C/30 min | 871 | 19.10 | 0.71 | 11.86 | 425 |
| FTO/c-TiO <sub>2</sub> /m-TiO <sub>2</sub> /60 nm size of ZrO <sub>2</sub> /Carbon/ (5-AVA) <sub>x</sub> MA <sub>1-x</sub> PbI <sub>3</sub>                                    | Screen-printing | 400°C/30 min | 865 | 18.19 | 0.70 | 11.08 | 425 |
| FTO/c-TiO <sub>2</sub> /m-TiO <sub>2</sub> /100 nm size of ZrO <sub>2</sub> /Carbon/ (5-AVA) <sub>x</sub> MA <sub>1-x</sub> PbI <sub>3</sub>                                   | Screen-printing | 400°C/30 min | 808 | 18.62 | 0.67 | 10.10 | 425 |
| FTO/c-TiO <sub>2</sub> /m-TiO <sub>2</sub> /1.2 μm ZrO <sub>2</sub> /graphite: oxygen-deficient carbon black/(5-AVA) <sub>x</sub> MA <sub>1-x</sub> PbI <sub>3</sub>           | Screen-printing | 400°C/30 min | 880 | 22.98 | 0.67 | 13.6  | 422 |

|                                                                                                                                                                 |                 |              |     |       |      |       |                |
|-----------------------------------------------------------------------------------------------------------------------------------------------------------------|-----------------|--------------|-----|-------|------|-------|----------------|
| FTO/c-TiO <sub>2</sub> /m-TiO <sub>2</sub> /1.2 μm ZrO <sub>2</sub> /graphite: oxygen-rich carbon black/(5-AVA) <sub>x</sub> MA <sub>1-x</sub> PbI <sub>3</sub> | Screen-printing | 400°C/30 min | 980 | 23.2  | 0.69 | 15.7  | <sup>422</sup> |
| FTO/c-TiO <sub>2</sub> /m-TiO <sub>2</sub> /ZrO <sub>2</sub> /carbon/(5-AVA) <sub>x</sub> MA <sub>1-x</sub> PbI <sub>3</sub>                                    | Screen-printing | 400°C/40 min | 920 | 22.75 | 0.67 | 13.98 | <sup>449</sup> |
| FTO/c-SnO <sub>2</sub> /m-TiO <sub>2</sub> /ZrO <sub>2</sub> /carbon/(5-AVA) <sub>x</sub> MA <sub>1-x</sub> PbI <sub>3</sub>                                    | Screen-printing | 400°C/40 min | 900 | 22.92 | 0.67 | 13.77 | <sup>449</sup> |

Abbreviations: DMF, dimethylformamide; DMSO, dimethyl sulfoxide; FTO, fluorine-doped tin oxide; GBL, gamma butyrolactone; NMP, N-Methyl-2-pyrrolidone

### 3.3.1.2. Conventional device architecture without an insulating layer

A triple mesoporous layer-based C-PSC requires an additional  $\text{ZrO}_2$  insulating layer and high processing temperature for interfacial bonding. These factors increase the energy cost. Furthermore, its application for a flexible C-PSC is limited due to high temperature processing. However, the conventional device architecture for a C-PSC usually comprises FTO/c- $\text{TiO}_2$ /m- $\text{TiO}_2$ /perovskite/carbon paste or FTO/c- $\text{TiO}_2$ /m- $\text{TiO}_2$ /perovskite/HTM/carbon paste. In the above device configuration, perovskite is first deposited onto the mesoporous  $\text{TiO}_2$  layer. Except for the perovskite crystal infiltrated into mesoporous  $\text{TiO}_2$ , a perovskite capping layer is also built; it physically prevents direct contact of  $\text{TiO}_2$  and the carbon BE. Thus, an insulating spacer layer is not required to reduce carrier recombination. Then, a carbon BE is deposited on top of the perovskite layer or HTM layer. Finally, the device is sintered at a low temperature—considering the instability of the perovskite layer. Moreover, low-temperature ( $< 150^\circ\text{C}$ ) processing allows the device fabrication on the flexible substrate. Given the features of conventional device architecture for C-PSCs, in this section we discuss the carbon film, HTM incorporation, and ETM optimization.

Ma *et al.*<sup>450</sup> developed a carbon electrode by doctor-blade coating carbon paste dispersed in chlorobenzene, followed by drying at  $70^\circ\text{C}$  for 40 min. The authors showed that the square resistance of carbon film is decreased as its thickness increases. And thus giving effect toward the photovoltaic performance of the device. At the optimal carbon film thickness ( $\sim 20\ \mu\text{m}$ ), the PCE is 9.08% (**Fig. 27a–g**).

A graphite layer tends to produce an interspace between the graphite flakes and perovskites due to its lamellar nature.<sup>451</sup> Thus, without a spacer layer, a HTM-free

conventional C-PSC device usually suffers from poor contact at perovskite/carbon interface. To improve the contact sites at the perovskite/carbon BE interface, Meng *et al.* investigated the effect of graphite flake size on C-PSC performance. A carbon BE made of small graphite flakes exhibits higher performance compared to when larger graphite flakes are used. This phenomenon occurs because BEs made with smaller graphite particles have more contact sites with the perovskite film and thus there is reduced charge transfer resistance during hole extraction from the perovskite to carbon BEs.<sup>451</sup> The PCE is further improved to a maximum of 10.2% when incorporating 20 wt% small CB particles (**Fig. 27h–j**). Hagfeldt *et al.*<sup>452</sup> developed a CB BE by incorporating a low-cost carbon cloth into the carbon paste. When a carbon cloth is embedded into carbon paste as BE for a PSC, the device exhibits a PCE up to 15.29%, with a  $J_{SC}$  of 20.4 mA/cm<sup>2</sup>, an excellent  $V_{OC}$  of 1.12 V, and a high FF of 0.67. By contrast, an insulating carbon fiber embedded into the carbon paste as a control BE shows a poor PCE (8.7%) with a very low FF (0.429).

Bio-carbons are a potential carbon material with an ultra-low-cost; they can be prepared by biomass pyrolysis. Very recently, Gao *et al.*<sup>453</sup> developed economical and eco-friendly bio-carbons as PSC BEs. The authors examined four biomasses—corn stalks, peanut shells, *Phragmites australis*, and bamboo chopsticks—to prepare bio-carbons via a carbonization process under nitrogen flow. The device performance of C-PSCs based on different bio-carbon BEs is affected by the combination effects from the morphology of these bio-carbons, the interfacial connection, WF, and the sheet resistance of the bio-carbons. Bamboo chopstick bio-carbons exhibit a suitable WF (4.80 eV) for better energy level alignment, lower radiative recombination, and faster carrier transport in C-PSCs compared to other bio-carbon BE based devices. Thus, the C-PSCs based on bamboo

chopstick bio-carbon BE produce the highest PCE of 12.82% (**Fig. 28a–g**). PSCs based on a bio-carbon BE are more stable than that of conventional devices. Indeed, they maintain 87% of the initial PCE after stored at room temperature for 2000 h.

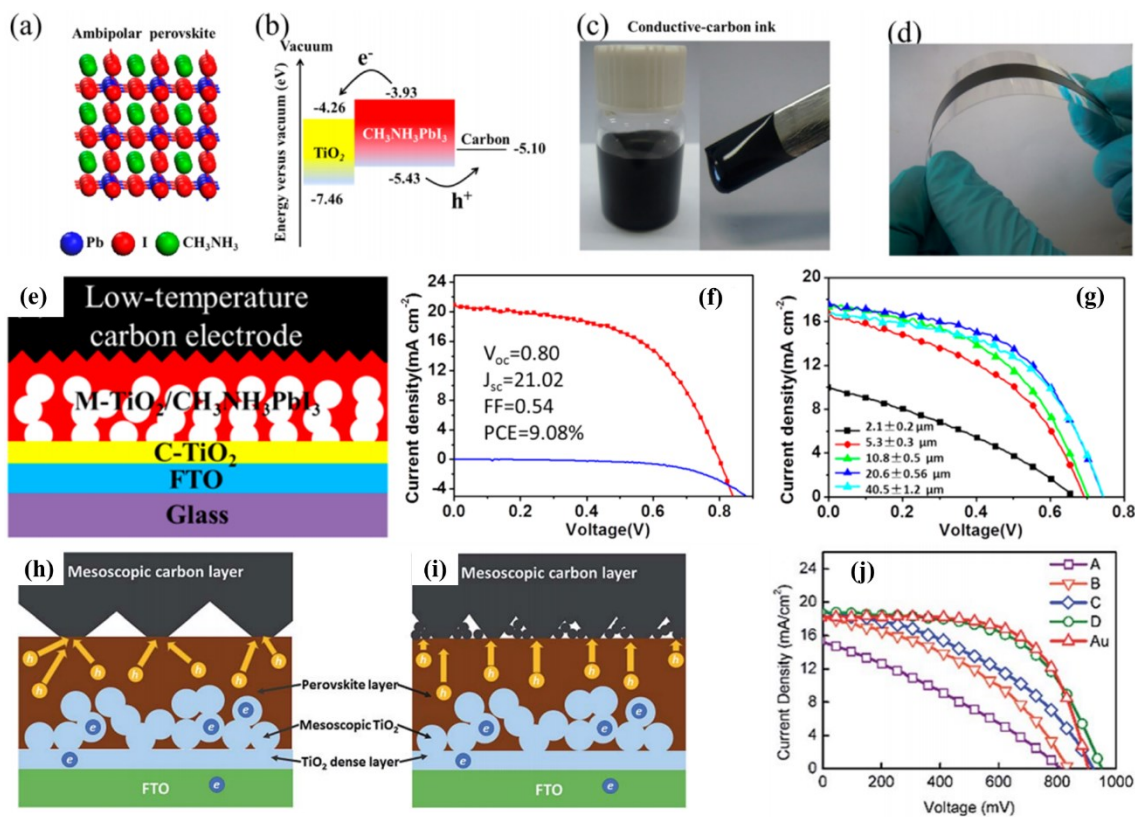

**Fig. 27** a) The crystal structure of  $\text{CH}_3\text{NH}_3\text{PbI}_3$ . (b) An energy-level diagram of  $\text{TiO}_2$ ,  $\text{CH}_3\text{NH}_3\text{PbI}_3$ , and carbon. (c) Images of conductive carbon ink. (d) Conductive carbon film prepared on a plastic substrate at  $70^\circ\text{C}$ . (e) A schematic of the device architecture. (f) J-V characteristics of the best performing m- $\text{TiO}_2/\text{CH}_3\text{NH}_3\text{PbI}_3/\text{carbon}$ -perovskite solar cell (C-PSC) device based on a low-temperature processed carbon back electrode. (g) J-V curves of a m- $\text{TiO}_2/\text{CH}_3\text{NH}_3\text{PbI}_3/\text{C}$ -PSC devices based on various carbon back electrode (BE) thicknesses. Copyright 2014, American Chemical Society; reprinted with permission.<sup>450</sup> A scheme of the charge transfer in a hole transporting medium (HTM)-free

CH<sub>3</sub>NH<sub>3</sub>PbI<sub>3</sub>/TiO<sub>2</sub> heterojunction solar cells with a BE consisting of h) large graphite flakes or i) smaller graphite flakes and carbon black particles. j) The J-V curves of a HTM-free C-PSC device with various BEs. Copyright 2014, The Royal Society of Chemistry; reprinted with permission.<sup>451</sup>

With regard to conventional C-PSCs, the carbon layer is directly deposited on top of the pre-deposited perovskite films. Thus, the processing solvent for the carbon paste should not damage the underlying perovskite film. The ideal processing solvent for carbon paste should possess the following properties: (i) the solvent should not dissolve the lower perovskite film; and (ii) the solvent should sufficiently dissolve the binder to ensure the homogeneity of the carbon film. Based on a detailed investigation, propylene glycol monomethyl ether acetate (PGMEA) emerged as the processing solvent for carbon paste that is most friendly to perovskite.<sup>454</sup> A C-PSC device based on the PGMEA method shows a much higher PCE of 13.5% compared to using a device with a commercial carbon BE (5.26%). Furthermore, some fast solvent evaporation processes may be used to avoid the damage of underlying perovskite layer. Yang *et al.*<sup>455</sup> used a simple and efficient gas pump process to significantly shorten the solvent evaporation time in the carbon paste. This procedure leads to a uniform and continuous surface morphology in the perovskite film. The as-prepared C-PrSCs based on gas pump method showed a PCE of 12.3% and a V<sub>OC</sub> of 1.03 V, values that are much higher than that of the control device, with a PCE of 4.73% and V<sub>OC</sub> of 0.81 V.

Separate fabrication of a carbon film followed by stacking it on the perovskite layer represents another solution to avoid possible damage to the perovskite layer. However,

there is reduced interfacial bonding at the perovskite and carbon interface. To address this drawback, Meng *et al.*<sup>456</sup> fabricated a free-standing flexible carbon film containing 20%wt thermoplastic poly(vinyl acetate) (PVAc) as a BE by doctor blading. They then directly hot-pressed the BE on top of perovskite film at 85°C. Strong interfacial bonding is formed during hot pressing due to the thermoplasticity of PVAc. After optimizing the weight ratio of graphite flakes and CB in the carbon film, the champion device based on the free-standing carbon film exhibits a PCE of 13.53%.

To improve interface contact between the perovskite layer and carbon BE, while maintaining efficient charge separations and enhancing the hole extraction ability, HTMs are usually inserted between the perovskite layer and carbon BE.<sup>452,457–461</sup> Sun *et al.* observed a remarkable PCE of 16.1% by incorporating CuPc nanorods as an HTM to enhance hole extraction between the MAPbI<sub>3</sub> film and carbon BE (**Fig. 28h–k**).<sup>462</sup> The CuPc nanorods are usually deposited via thermal vapor deposition, which is complicated (e.g. high-vacuum conditions are required) and costly due to the poor solubility of CuPc. To improve CuPc solubility, the authors developed a solution-processable CuPc-TIPS with hydrophobic triisopropylsilylethynyl (TIPS) groups. The champion C-PSC based on CuPc-TIPS exhibits the highest efficiency of 14.0%. Furthermore, the device exhibits good long-term stability in the dark at ambient conditions (~ 35% relative humidity). After 720 h, the best device maintained about 90% of its initial PCE (from 14.0% to 12.5%) because the hydrophobic CuPc-TIPS HTM interlayer prevents moisture from penetrating the perovskite layer.<sup>463</sup> Another group incorporated the small organic molecule 5,10,15-triphenyl-5Hdiindolo[3,2-a:3',2'-c]carbazole (TPDI) into C-PSCs as a HTM; this process does not require a vacuum. This device has a PCE 15.5% and a FF up to 0.75.<sup>464</sup> Li *et al.*<sup>465</sup>

incorporated an inorganic HTM ( $\text{NiO}_x$  nanoparticles) into carbon paste and found a PCE of 13.26% compared to 10.29% of a device with a pure carbon BE. Moreover, the C-PSC maintains 85% of the initial efficiency after storage at ambient conditions for 800 h.

From perovskite film processing, to improve the interfacial contact of perovskite/carbon layer, Meng *et al.*<sup>466</sup> proposed a solvent engineering method based on a two-step sequential method to realize a uniform and compact perovskite capping layer. They hypothesized that this process will enhance the contact between the perovskite layer and the carbon BE (mainly composed of CB and graphite flakes). They obtained the highest PCE of 14.38% with a FF of 0.65 and a PCE of 10% for the device with a  $1 \text{ cm}^2$  area.<sup>466</sup> Moreover, through colloidal engineering to form ultra-even perovskite layer, they further boosted the efficiency of the C-PSC to 14.58%.<sup>467</sup>

Some strategies from the aspects of the ETMs optimization, such as the optimization of  $\text{TiO}_2$  thickness,<sup>468</sup> the chemical doping of  $\text{TiO}_2$ <sup>469–471</sup> or  $\text{SnO}_2$ ,<sup>458</sup> the size and morphology of  $\text{TiO}_2$ ,<sup>472–475</sup> its surface modification,<sup>476–478</sup> and a bilayer of  $\text{TiO}_2/\text{SnO}_2$ <sup>479</sup> improve C-PSC performance.

It was observed that the  $\text{TiO}_2$  thickness also affected the device performance. In 2014, Sun's group<sup>468</sup> deposited a low-temperature-processed ( $100^\circ\text{C}$ ) carbon BE by doctor-blading technology. They then deposited the carbon BE on the already-deposited perovskite layer. After optimization, the HTM-free perovskite/ $\text{TiO}_2$  device achieves a remarkable efficiency of 8.31% and excellent stability over 800 h (see **Fig. 28 I-o**).

To improve the electron injection efficiency as well as the stability of C-PSCs upon exposure to UV light, Zhao *et al.*<sup>469</sup> developed W-doped  $\text{TiO}_2$  to enhance electron

conductivity. The C-PSC based on W-TiO<sub>2</sub> exhibits a high PCE up to 12.06% with an improved J<sub>SC</sub> and FF value due to facilitated electron transfer efficiency. Another group investigated Ni-doped rutile TiO<sub>2</sub> as an ETM in planar C-PSCs.<sup>470</sup> Ni doping shifted up the Fermi level of TiO<sub>2</sub> and also increases its electron mobility; these phenomena enhance electron extraction and carrier transport. The planar C-PSC based on 0.01 M Ni doped TiO<sub>2</sub> as the ETM (optimal doping level) and with CuPc as the HTM has a PCE up to 17.46%, which is higher than that of using pristine TiO<sub>2</sub>, with a PCE of 15.82%. The device also exhibits excellent stability, with a retention of > 97% of its initial efficiency after stored in ambient air for 1200 h. These works indicate that TiO<sub>2</sub> with appropriate heteroatom doping can improve the efficiency and enhance the stability of C-PSCs.

Coating an additional layer (MgTiO<sub>3</sub>,<sup>476</sup> PC<sub>61</sub>BM,<sup>477</sup> or MgO<sup>478,480</sup>) onto the surface of TiO<sub>2</sub> was demonstrated to be an effective strategy to improve device performance by reducing interfacial charge recombination. Huang *et al.*<sup>478</sup> coated an ultrathin wide bandgap MgO layer onto mesoporous TiO<sub>2</sub>. Together with modulating perovskite crystallization with a terephthalic acid additive, the C-PSC device shows a high average PCE of 14.29%. Considering the high temperature sintering and photocatalytic-activity of the TiO<sub>2</sub>, Zhou *et al.*<sup>481</sup> employed SnO<sub>2</sub> with high electron mobility and low photo-catalytic activity as the ETM for planar C-PSCs. With (FAPbI<sub>3</sub>)<sub>0.97</sub>(MAPbBr<sub>3</sub>)<sub>0.03</sub> as the light harvesting material and CuPc as the HTM, the prepared C-PSC based on SnO<sub>2</sub> shows a higher PCE of 14.2% compared to a C-PSC based on TiO<sub>2</sub> (10.46%), with excellent storage stability up to 3600 h. Later, Liao *et al.*<sup>479</sup> utilized a TiO<sub>2</sub>/SnO<sub>2</sub> bilayer as the ETM and CuPc as the HTM for C-PSCs. Attributed to the better energy level alignment and inhibited electron-hole recombination, C-PSCs based on the TiO<sub>2</sub>/SnO<sub>2</sub> bilayer shows a best efficiency of 15.39%

and excellent stability over 1200 h. **Table 9** exhibits the summary information of carbon-based perovskite solar cells with device structure of  $\text{TiO}_2$ /perovskite/carbon past.

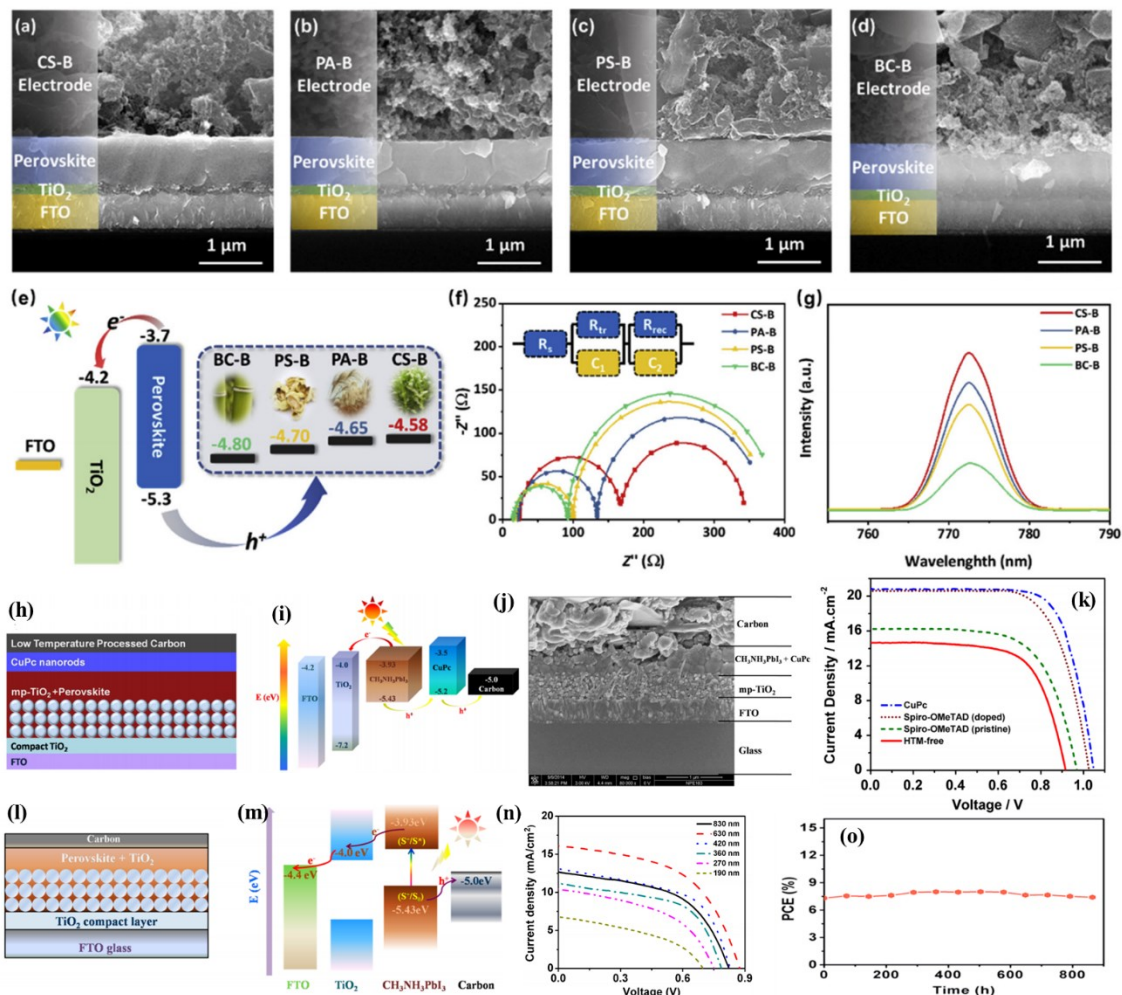

**Fig. 28** Cross-sectional scanning electron microscopy (SEM) images of a carbon-based perovskite solar cell (C-PSC) with a (a) corn stalk-based back electrode (CS-B), (b) *Phragmites australis*-based back electrode (PA-B), (c) peanut shell-based back electrode (PS-B), and (d) BC-B (bamboo chopstick-based back electrode). (e) Energy level diagram of the C-PSC devices based on different bio-carbon electrodes. (f) The Nyquist plots and the fitted equivalent circuit were carried out based on different bio-carbon BEs. (g) The steady-state PL spectra of the fluorine-doped tin oxide (FTO)/c- $\text{TiO}_2$ /m- $\text{TiO}_2$ /perovskite/biocarbon BEs. Copyright 2020, Elsevier; reprinted with permission.<sup>453</sup> (h) A schematic of the entire device configuration. (i) The corresponding energy level

diagram. (j) Cross-sectional view of the whole device. (k) J-V curves of C-PSC based on various hole transporting media (HTM) measured under one sun illumination. Copyright 2016, Elsevier; reprinted with permission.<sup>462</sup> (l) Device configuration of the C-PSC. (m) Energy levels diagrams of various device components. (n) J-V curves of C-PSCs based on different TiO<sub>2</sub> film thicknesses. (o) Long-term monitoring of the device performance stored in ambient atmosphere at room temperature without encapsulation. Copyright 2014, American Chemical Society; reprinted with permission.<sup>468</sup>

**Table 9.** Summary of photovoltaic parameters for different carbon-based perovskite solar cells with the conventional device configuration TiO<sub>2</sub>/perovskite/carbon past.

| Device configuration                                                                                                                                                                          | Deposition<br>method | Thermal treatment          | $V_{OC}$<br>(mV) | $J_{SC}$<br>(mA cm <sup>-2</sup> ) | FF    | $\eta$<br>(%) | Ref. |
|-----------------------------------------------------------------------------------------------------------------------------------------------------------------------------------------------|----------------------|----------------------------|------------------|------------------------------------|-------|---------------|------|
| FTO/c-TiO <sub>2</sub> /190 nm m-TiO <sub>2</sub> /MAPbI <sub>3</sub> /Carbon                                                                                                                 | doctor-blading       | 100°C/30 min               | 700              | 6.94                               | 41.09 | 2.00          | 468  |
| FTO/c-TiO <sub>2</sub> /270 nm m-TiO <sub>2</sub> /MAPbI <sub>3</sub> /Carbon                                                                                                                 | doctor-blading       | 100°C/30 min               | 750              | 10.43                              | 47.72 | 3.71          | 468  |
| FTO/c-TiO <sub>2</sub> /360 nm m-TiO <sub>2</sub> /MAPbI <sub>3</sub> /Carbon                                                                                                                 | doctor-blading       | 100°C/30 min               | 780              | 11.43                              | 55.08 | 4.91          | 468  |
| FTO/c-TiO <sub>2</sub> /420 nm m-TiO <sub>2</sub> /MAPbI <sub>3</sub> /Carbon                                                                                                                 | doctor-blading       | 100°C/30 min               | 830              | 13.41                              | 54.28 | 6.02          | 468  |
| FTO/c-TiO <sub>2</sub> /630 nm m-TiO <sub>2</sub> /MAPbI <sub>3</sub> /Carbon                                                                                                                 | doctor-blading       | 100°C/30 min               | 870              | 16.10                              | 52.60 | 7.40          | 468  |
| FTO/c-TiO <sub>2</sub> /830 nm m-TiO <sub>2</sub> /MAPbI <sub>3</sub> /Carbon                                                                                                                 | doctor-blading       | 100°C/30 min               | 820              | 12.67                              | 52.60 | 5.48          | 468  |
| FTO/c-TiO <sub>2</sub> /450 nm m-TiO <sub>2</sub> /MAPbI <sub>3</sub> (by sequential<br>deposition)/Carbon paste (composed of 95 wt% graphite flakes [20<br>µm in size] + 0 wt% carbon black) | screen-printing      | Room temperature<br>15 min | 816.3            | 15.29                              | 0.30  | 3.76          | 451  |
| FTO/c-TiO <sub>2</sub> /450 nm m-TiO <sub>2</sub> /MAPbI <sub>3</sub> (by sequential<br>deposition)/Carbon paste (composed of 95 wt% graphite flake (3 µm<br>in size) + 0 wt% carbon black)   | screen-printing      | Room temperature<br>15 min | 837.2            | 18.30                              | 0.40  | 6.16          | 451  |
| FTO/c-TiO <sub>2</sub> /450 nm m-TiO <sub>2</sub> /MAPbI <sub>3</sub> (by sequential                                                                                                          | screen-printing      | Room temperature           | 921.2            | 18.85                              | 0.42  | 7.21          | 451  |

|                                                                                                                                                                                        |                 |                            |      |       |      |       |     |
|----------------------------------------------------------------------------------------------------------------------------------------------------------------------------------------|-----------------|----------------------------|------|-------|------|-------|-----|
| deposition)/Carbon paste (composed of 95 wt% graphite flake (1 μm in size) + 0 wt% carbon black)                                                                                       |                 | 15 min                     |      |       |      |       |     |
| FTO/c-TiO <sub>2</sub> /450 nm m-TiO <sub>2</sub> /MAPbI <sub>3</sub> (by sequential deposition)/Carbon paste (composed of 75 wt% graphite flake (1 μm in size) + 20 wt% carbon black) | screen-printing | Room temperature<br>15 min | 953  | 18.73 | 0.57 | 10.2  | 451 |
| FTO/c-TiO <sub>2</sub> /450 nm m-TiO <sub>2</sub> /MAPbI <sub>3</sub> (by sequential deposition)/Au (as control device)                                                                | screen-printing | Room temperature<br>15 min | 911  | 18.15 | 0.65 | 10.73 | 451 |
| FTO/c-TiO <sub>2</sub> /m-TiO <sub>2</sub> /MAPbI <sub>3</sub> /CuPc/Carbon                                                                                                            | doctor-blading  | 100°C/30 min               | 1050 | 20.8  | 0.74 | 16.1  | 462 |
| FTO/c-TiO <sub>2</sub> /m-TiO <sub>2</sub> /MAPbI <sub>3</sub> /doped spiro-OMeTAD/Carbon                                                                                              | doctor-blading  | 100°C/30 min               | 1030 | 20.6  | 0.71 | 15.0  | 462 |
| FTO/c-TiO <sub>2</sub> /m-TiO <sub>2</sub> /MAPbI <sub>3</sub> /non-doped spiro-OMeTAD/Carbon                                                                                          | doctor-blading  | 100°C/30 min               | 970  | 16.2  | 0.66 | 10.4  | 462 |
| FTO/c-TiO <sub>2</sub> /m-TiO <sub>2</sub> /MAPbI <sub>3</sub> /HTM-free/Carbon                                                                                                        | doctor-blading  | 100°C/30 min               | 920  | 14.7  | 0.67 | 9.0   | 462 |
| FTO/c-TiO <sub>2</sub> /m-TiO <sub>2</sub> /(FAPbI <sub>3</sub> ) <sub>0.85</sub> (MAPbBr <sub>3</sub> ) <sub>0.15</sub> / pristine CuPc-TIPS/Carbon                                   | doctor-blading  | 100°C/30 min               | 1010 | 21.4  | 0.65 | 14.0  | 463 |
| FTO/c-TiO <sub>2</sub> /m-TiO <sub>2</sub> /(FAPbI <sub>3</sub> ) <sub>0.85</sub> (MAPbBr <sub>3</sub> ) <sub>0.15</sub> / pristine spiro-OMeTAD /Carbon                               | doctor-blading  | 100°C/30 min               | 980  | 18.1  | 0.56 | 9.9   | 463 |
| FTO/c-TiO <sub>2</sub> /m-TiO <sub>2</sub> /(FAPbI <sub>3</sub> ) <sub>0.85</sub> (MAPbBr <sub>3</sub> ) <sub>0.15</sub> / doped spiro-OMeTAD/Carbon                                   | doctor-blading  | 100°C/30 min               | 1020 | 22.2  | 0.70 | 15.8  | 463 |
| FTO/c-TiO <sub>2</sub> /m-TiO <sub>2</sub> /MAPbI <sub>3</sub> /doped-TPDI/Carbon                                                                                                      | doctor-blading  | 100°C/30 min               | 1030 | 20.1  | 0.75 | 15.5  | 464 |

|                                                                                                                                                                                                                                   |                               |              |      |       |       |       |     |
|-----------------------------------------------------------------------------------------------------------------------------------------------------------------------------------------------------------------------------------|-------------------------------|--------------|------|-------|-------|-------|-----|
| FTO/c-TiO <sub>2</sub> /m-TiO <sub>2</sub> /MAPbI <sub>3</sub> /pristine-TPDI/Carbon                                                                                                                                              | doctor-blading                | 100°C/30 min | 1030 | 18.7  | 0.71  | 13.6  | 464 |
| FTO/Ni doped TiO <sub>2</sub> / Cs <sub>5</sub> (MA <sub>0.17</sub> FA <sub>0.83</sub> ) <sub>95</sub> Pb(I <sub>0.83</sub> Br <sub>0.17</sub> ) <sub>3</sub> /CuPc/Carbon                                                        | doctor-blading                | 85°C/15 min  | 1073 | 22.41 | 0.726 | 17.46 | 470 |
| FTO/TiO <sub>2</sub> /Cs <sub>5</sub> (MA <sub>0.17</sub> FA <sub>0.83</sub> ) <sub>95</sub> Pb(I <sub>0.83</sub> Br <sub>0.17</sub> ) <sub>3</sub> /CuPc/Carbon                                                                  | doctor-blading                | 85°C/15 min  | 1040 | 21.76 | 0.699 | 15.82 | 470 |
| FTO/Ni doped TiO <sub>2</sub> /Cs <sub>5</sub> (MA <sub>0.17</sub> FA <sub>0.83</sub> ) <sub>95</sub> Pb(I <sub>0.83</sub> Br <sub>0.17</sub> ) <sub>3</sub> /Carbon                                                              | doctor-blading                | 85°C/15 min  | 913  | 18.94 | 0.624 | 10.79 | 470 |
| FTO/TiO <sub>2</sub> /Cs <sub>5</sub> (MA <sub>0.17</sub> FA <sub>0.83</sub> ) <sub>95</sub> Pb(I <sub>0.83</sub> Br <sub>0.17</sub> ) <sub>3</sub> /Carbon                                                                       | doctor-blading                | 85°C/15 min  | 875  | 18.15 | 0.609 | 9.67  | 470 |
|                                                                                                                                                                                                                                   | doctor                        |              |      |       |       |       |     |
| FTO/c-TiO <sub>2</sub> /m-TiO <sub>2</sub> /Cs <sub>5</sub> (MA <sub>0.17</sub> FA <sub>0.83</sub> ) <sub>95</sub> Pb(I <sub>0.83</sub> Br <sub>0.17</sub> ) <sub>3</sub> / spiro-OMeTAD/Carbon cloth embedded in carbon paste    | blading/hot-pressure transfer | 70°C/10 min  | 1120 | 20.42 | 0.670 | 15.29 | 452 |
|                                                                                                                                                                                                                                   | Doctor-                       |              |      |       |       |       |     |
| FTO/c-TiO <sub>2</sub> /m-TiO <sub>2</sub> /Cs <sub>5</sub> (MA <sub>0.17</sub> FA <sub>0.83</sub> ) <sub>95</sub> Pb(I <sub>0.83</sub> Br <sub>0.17</sub> ) <sub>3</sub> /spiro-OMeTAD/insulating cloth embedded in carbon paste | blading/hot-pressure transfer | 70°C/10 min  | 1080 | 18.42 | 0.429 | 8.7   | 452 |
|                                                                                                                                                                                                                                   | doctor-blading                |              |      |       |       |       |     |
| FTO/c-TiO <sub>2</sub> /m-TiO <sub>2</sub> /MAPbI <sub>3</sub> /free-standing carbon film (Graphite/CB=1:0)                                                                                                                       | /Hot-press                    | 85°C/15 s    | 967  | 18.77 | 0.566 | 10.27 | 456 |
|                                                                                                                                                                                                                                   | doctor-blading                |              |      |       |       |       |     |
| FTO/c-TiO <sub>2</sub> /m-TiO <sub>2</sub> /MAPbI <sub>3</sub> /free-standing carbon film (Graphite/CB=5:1)                                                                                                                       | /Hot-press                    | 85°C/15 s    | 982  | 20.03 | 0.581 | 11.43 | 456 |
|                                                                                                                                                                                                                                   | doctor-blading                |              |      |       |       |       |     |
| FTO/c-TiO <sub>2</sub> /m-TiO <sub>2</sub> /MAPbI <sub>3</sub> /free-standing carbon film (Graphite/CB=3:1)                                                                                                                       | /Hot-press                    | 85°C/15 s    | 1002 | 21.30 | 0.634 | 13.53 | 456 |

|                                                                                                              |      |                |     |        |                 |              |        |            |       |          |     |
|--------------------------------------------------------------------------------------------------------------|------|----------------|-----|--------|-----------------|--------------|--------|------------|-------|----------|-----|
| FTO/c-TiO <sub>2</sub> /m-TiO <sub>2</sub> /MAPbI <sub>3</sub> /free-standing carbon film (Graphite/CB=2:1)  |      |                |     |        | doctor-blading  | 85°C/15 s    | 973    | 20.57      | 0.623 | 12.47    | 456 |
|                                                                                                              |      |                |     |        | /Hot-press      |              |        |            |       |          |     |
| FTO/c-TiO <sub>2</sub> /m-TiO <sub>2</sub> /MAPbI <sub>3</sub> /Commercial carbon paste (control)            |      |                |     |        | doctor-blade    | 100°C/-      | 930    | 11.73      | 0.480 | 5.26     | 454 |
| FTO/c-TiO <sub>2</sub> /m-TiO <sub>2</sub> /MAPbI <sub>3</sub> /Carbon paste (processing solvent: PGMEA)     |      |                |     |        | doctor-blade    | 100°C/-      | 1050   | 20.25      | 0.630 | 13.5     | 454 |
| FTO/c-TiO <sub>2</sub> /m-TiO <sub>2</sub> /MAPbI <sub>3</sub> /Carbon paste (processing solvent: terpineol) |      |                |     |        | doctor-blade    | 100°C/-      | 730    | 18.20      | 0.360 | 4.77     | 454 |
| FTO/c-TiO <sub>2</sub> /m-TiO <sub>2</sub> /MAPbI <sub>3</sub> /Carbon (slow drying)                         |      |                |     |        | screen-printing | 100°C/20 min | 810    | 14.6       | 0.400 | 4.73     | 455 |
| FTO/c-TiO <sub>2</sub> /m-TiO <sub>2</sub> /MAPbI <sub>3</sub> /Carbon (gas pump involved fast drying)       |      |                |     |        | screen-printing | 100°C/3 min  | 1030   | 21.4       | 0.560 | 12.3     | 455 |
| Abbreviations:                                                                                               | FTO, | fluorine-doped | tin | oxide; | PGMEA,          | propylene    | glycol | monomethyl | ether | acetate. |     |

### 3.3.2. Carbon nanotubes (CNTs) for PSCs

CNTs possess excellent thermal and electrical conductivity and are very hydrophobic and highly stable. Hence, they have attracted much attention for electronic and optoelectronic applications.<sup>482</sup> CNTs have been employed as p-type contacts for organic or inorganic solar cells.<sup>483,484</sup> They possess a suitable WF value in the range of 4.7 to 5.1 eV,<sup>485,486</sup> enabling them to be a potential BE or HTM for PSCs. In this section, we summarize the recent progress of CNTs as BEs, including their function in the hole transporting layer. Based on their characteristics, an isolated CNT layer has usually been applied as a BE for conventional C-PSC devices. On the other hand, CNTs with a p-type character and high mobility can be an efficient additive to embed into perovskite layer<sup>487,488</sup> or the carbon film<sup>488,489</sup> to improve the hole extraction at the perovskite/carbon BE interface.

Li *et al.* first employed CNTs as a PSC BE.<sup>490</sup> They dripped anti-solvent toluene onto the top of the CNT film after the deposition on the perovskite layer to improve the physical interfacial contact of CH<sub>3</sub>NH<sub>3</sub>PbI<sub>3</sub>/CNTs. Toluene does not damage the underlying perovskite film; rather, it wets the surface of both films and thus improves the CH<sub>3</sub>NH<sub>3</sub>PbI<sub>3</sub>/CNT contact. The photoluminescence quenching results indicate the strong adhesion through van der Waals interactions between CH<sub>3</sub>NH<sub>3</sub>PbI<sub>3</sub> and CNT films. Thus, PSC devices based on this laminated CNT show a PCE of 6.87%, which is higher than 5.14% from a device with an Au BE (**Fig. 29a–e**). However, the interfacial surface contact between perovskite and CNT suffered an inferior contact. To improve the interfacial surface between the staking of perovskite and CNT, Jang *et al.*<sup>487</sup> dripped anti-solvent containing multi-walled carbon nanotubes (MWCNTs) on perovskite layer prior to the thermal annealing of the perovskite film. This process successfully incorporates MWCNTs

into the grain boundaries of the perovskite film to form CNT-perovskite heterojunction, providing channel for rapid hole extraction from perovskite to carbon back electrode. The device based on carbon BE prepared by screen printing by utilizing this strategy showed a high efficiency of 13.57% with less hysteresis, which is attributed to the improved interfacial contact of perovskite and the carbon BE and reduced series resistance ( $R_s$ ) and charge transfer resistance ( $R_h$ ).

Yang *et al.*<sup>429</sup> successfully deposited an MWCNT film onto a perovskite film with a seamless contact at the interface of perovskite/MWCNT by a simple ultrasound spray method. The control device based on drop-casted MWCNT BE exhibits a poor PCE of 12.08%,  $J_{SC}$  of 19.31 mA/cm<sup>2</sup>, FF of 0.712, and  $V_{OC}$  of 0.88. However, a C-PSC based on ultrasound spray MWCNT BE shows a higher PCE up to 14.07%, as well as an improved  $J_{SC}$  of 21.03 mA/cm<sup>2</sup> and a remarkably high FF of 0.744 and  $V_{OC}$  of 0.899 V. This device also shows excellent long-term stability and exhibits almost zero PCE loss after storage in a dry box (15% relative humidity) for 3000 h. Li *et al.* proposed a CNT bridging method for device fabrication by incorporating SWCNTs in both the perovskite and carbon layers to form a high-quality perovskite/carbon interface (**Fig. 29f–i**).<sup>488</sup> The penetrated CNT bridges into both the CH<sub>3</sub>NH<sub>3</sub>PbI<sub>3</sub> layer and the carbon BE not only facilitated hole extraction at the interface of CNTs inserted CH<sub>3</sub>NH<sub>3</sub>PbI<sub>3</sub> film/CNTs incorporated carbon films but also promoted the conductivity of the carbon BE. Attributed to such merits, the prepared C-PSC shows a high PCE up to 15.73% with a good FF of 0.72. Moreover, the CNT bridging method enables the PSC to retain an excellent long-term stability over 90 days under severe conditions ( $65 \pm 5\%$  relative humidity at  $25 \pm 5^\circ\text{C}$  and  $25 \pm 5\%$  relative humidity at  $75 \pm 5^\circ\text{C}$ ).

When MWCNT BE was compared with graphite and CB BE. They found that MWCNT tightly attaches to the perovskite layer to form a consecutive and crack-free thin film. The compact MWCNT morphology with the improved contact with the perovskite layer enhances the FF and photovoltaic performance of a HTM-free C-PSC. Furthermore, the MWCNT-based device shows a negligible hysteresis effect. By optimizing the thickness of  $\text{PbI}_2$  precursor layer and MWCNT layer, a hysteresis-free PCE of 12.67% with an FF of up to 0.80 was achieved.<sup>491</sup> Due to the better hole extraction and hole mobility of CNTs compared to CB, Wang *et al.*<sup>489</sup> used a BE that comprises printed carbon paste containing SWCNTs on the top of  $\text{Al}_2\text{O}_3$ . With this technique, hole extraction from the perovskite to carbon BE is significantly boosted owing to the excellent hole mobility of SWCNTs. After optimization, the champion device based on a carbon BE containing 0.05 wt% SWCNTs achieves an efficiency up to 14.7%, with a high  $V_{\text{OC}}$  of 1.01 V and a FF of 0.69.<sup>489</sup> Under the same conditions, the control device without SWCNTs in the carbon BE shows a lower PCE of 9.9% ( $V_{\text{OC}} = 0.889$  V and FF = 0.55). SWCNT incorporation in the carbon BE modifies the WF and also reduces the charge recombination. These phenomena are helpful to improve the  $V_{\text{OC}}$  and FF of the device performance.

To increase  $V_{\text{OC}}$  and hole extraction efficiency, optimum energy level alignment is crucial. The WF of MWCNT is very high compared to the valence band (VB) of perovskite; hence, doping MWCNT with atoms that are electron deficient or rich can provide better energy level alignment with perovskite. Yang *et al.*<sup>492</sup> doped MWCNTs with B to decrease the WF and boost hole extraction at the perovskite/MWCNT interface (**Fig. 29j–l**). Together with the benefits of an additional physical barrier ( $\text{Al}_2\text{O}_3$ ) layer coating onto m- $\text{TiO}_2$  to reduce the charge recombination, this device achieves a high PCE up to 15.23%.

Moreover, the device maintains 85% and 93% of its highest PCE without encapsulation after 2 weeks of storage under thermal stress (80°C) and high humidity (~65% at 25°C), respectively. These outcomes are attributed to the hydrophobic characteristic of the MWCNTs and the compact interlinked MWCNT network films.

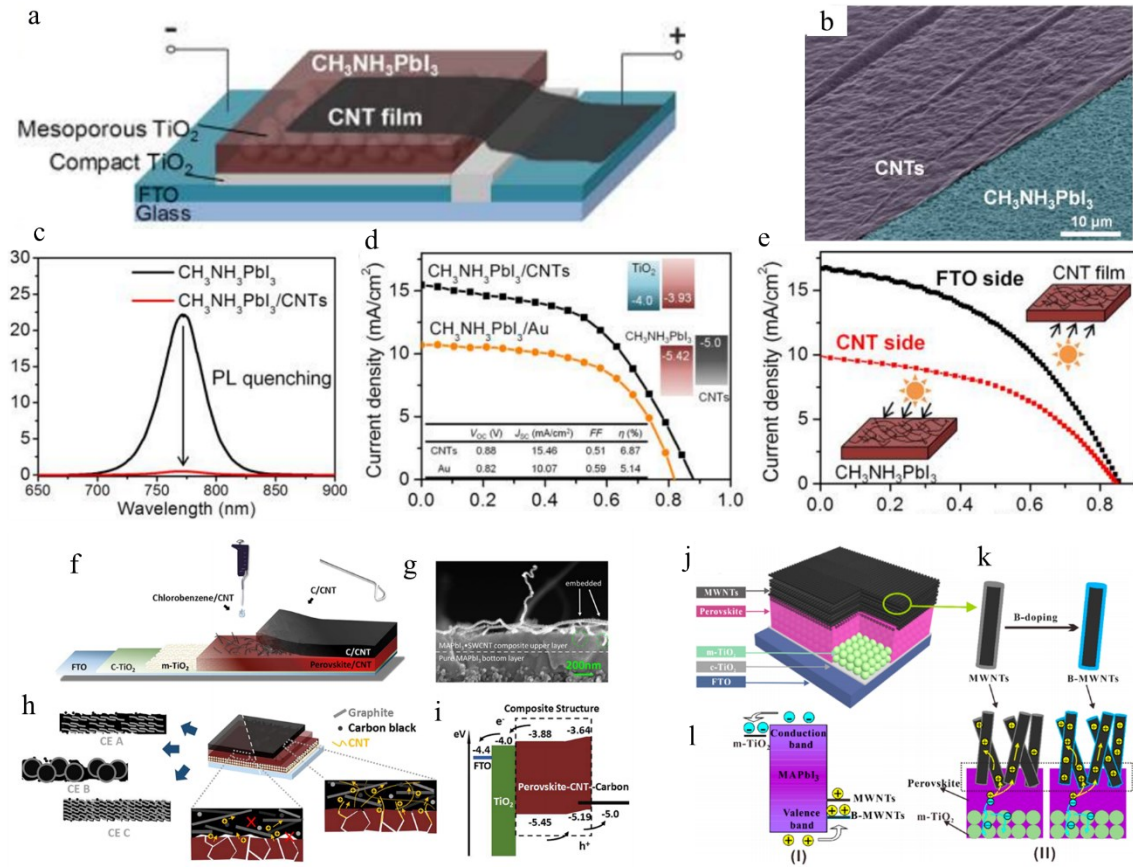

**Fig. 29** (a) Schematic of a perovskite solar cell (PSC) with a carbon nanotube (CNT) back electrode (BE). (b) A tilted scanning electron microscopy (SEM) image of CH<sub>3</sub>NH<sub>3</sub>PbI<sub>3</sub> perovskite substrate (blue) partly covered by a CNT electrode (purple). (c) Steady-state photoluminescence (PL) spectra of perovskite and perovskite/CNTs. (d) J-V curves of PSCs based on Au or CNT BEs under one sun illumination. (e) J-V curves of PSCs based

on CNT BE under different illumination direction. Copyright 2014, American Chemical Society; reprinted with permission.<sup>490</sup> (f) The schematic for device fabrication of paintable PSCs based on the CNT bridge method. (g) A cross-sectional SEM image of CNTs embedded in MAPbI<sub>3</sub>. (h) A schematic of hole extraction and transport at the MAPbI<sub>3</sub>/different carbon BE interface with/without the CNT bridging. (i) An energy level diagram of the related layers in a C-PSC device. Copyright 2019, American Chemical Society; reprinted with permission.<sup>488</sup> A schematic illustration of cell configuration, boron (B) doping of multi-walled carbon nanotube (MWCNTs), and charge behavior in C-PSCs. (j) A schematic illustration of the C-PSC configuration. (k) A schematic diagram of B doping of MWNTs to B-MWNTs. (l) A schematic illustration of charge transfer enhancement by B-MWNTs through in I shows reduced  $E_F$  of MWNTs, while II presents what happens when increasing the number of conduction carriers in the B-MWNT electrode. The intimate interface between perovskite and MWNTs is marked by black dotted rectangle in II. Copyright 2017, American Chemical Society; reprinted with permission.<sup>492</sup>

Insertion of an HTM in the perovskite/CNT interface is an effective way to boost hole extraction and reduce interfacial recombination. Aitola *et al.*<sup>493</sup> developed a spiro-OMeTAD infiltrated SWCNT as a C-PSC BE. They deposited the SWCNT film, prepared by the CVD method, on top of the perovskite film by a press-transfer process. They then densified the coated SWCNT film by dropping a small amount of chlorobenzene. To lower the SWCNT BE sheet resistance, they transferred double SWCNT layers onto the perovskite film. The C-PSC device with the above-described BE but without an HTM

shows a poor efficiency of 11%. By contrast, a device based on spiro-OMeTAD infiltrated SWCNT BE has a PCE up to 15.5%. Choi *et al.*<sup>494</sup> developed carbon sandwiched PSCs with C<sub>60</sub> as the ETM and MAPbI<sub>3</sub> as perovskite light absorbing film, together with the infiltration of spiro-OMeTAD into SWCNT. The prepared PSC device shows a markedly higher PCE (17%) compared to polymeric poly(triaryl amine) (PTAA) and poly(3-hexylthiophene) (P3HT) HTM. Indeed, this is a record-high PCE among the laminated CNT BE-based PSCs. Wu *et al.* inserted an inorganic copper(I) thiocyanate (CuSCN) as an HTM between the perovskite and the carbon BE to reduce the electron recombination process.<sup>482</sup> As a result, the updated CuSCN and CNT incorporated C-PSC device exhibits a V<sub>OC</sub> of 1.01 V and a PCE up to 17.58%, as well as enhanced long-term stability (**Fig. 30a–d**).

Guo *et al.*<sup>495</sup> developed a flexible PSC with an all-carbon electrode by using graphene as a transparent anode and CNTs as the BE. A flexible device containing this all-carbon electrode with and without spiro-OMeTAD HTM shows a PCE of 11.9% and 8.4%, respectively (**Fig. 30e–h**). The devices also exhibit good robustness against mechanical deformation compared to counterparts fabricated on a flexible ITO substrate. The flexible PSC with an all-carbon electrode also shows noticeably enhanced stability compared to the flexible PSCs based on Au or Ag BE under continuous light soaking or 60°C thermal stress in air, retaining over 90% of its original PCEs after 1000 h. To enhance the built-in potential and reduce the non-radiative recombination in C-PSCs, Yang *et al.*<sup>496</sup> inserted an ultrathin ferroelectric perovskite oxide (PbTiO<sub>3</sub>) layer between the TiO<sub>2</sub> layer and the perovskite film. The prepared C-PSC shows a remarkable PCE of 16.37%. The significantly improved V<sub>OC</sub> and PCE are mainly attributed to the enhanced built-in potential in the prepared C-

PSC device and reduced non-radiative recombination due to the incorporation of a ferroelectric  $\text{PbTiO}_3$  layer (**Fig. 30i–l**). **Table 10** shows the summary information of carbon-based perovskite solar cells with conventional device configuration and using carbon nanotubes (CNTs) as the back electrode.

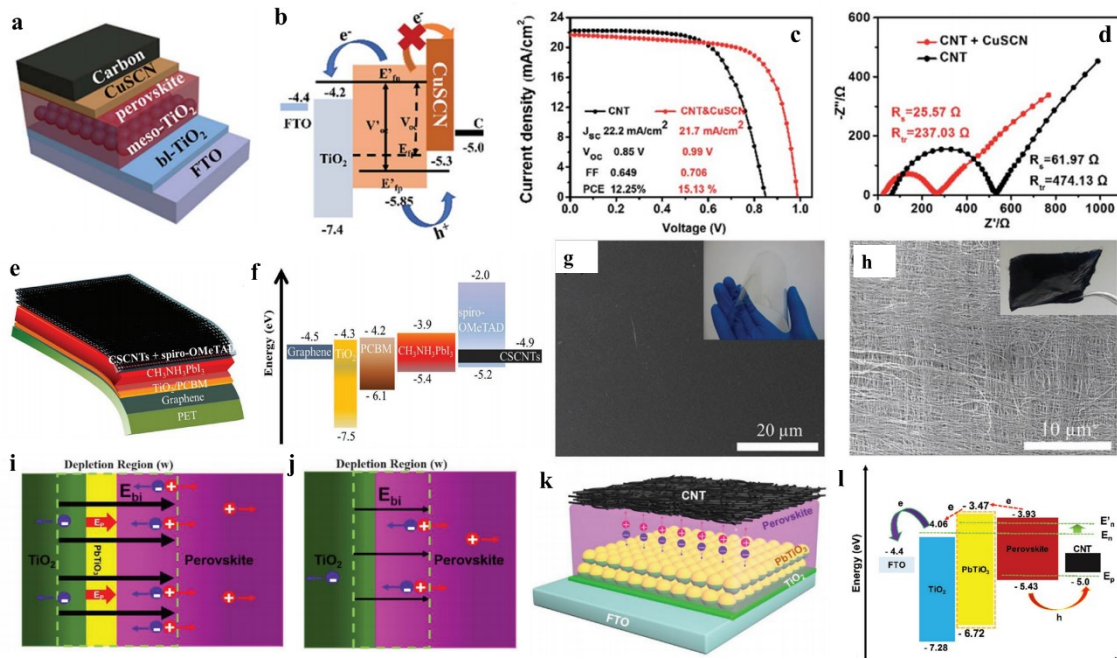

**Fig. 30** a) A schematic of a carbon-based perovskite solar cell (C-PSC) with copper(I) thiocyanate (CuSCN) and b) the corresponding energy level diagram of each layer. c) J-V curves and d) the impedance spectra of the HTM-free and CuSCN-based C-PSCs. Copyright 2019, The Royal Society of Chemistry; reprinted with permission.<sup>482</sup> e) A schematic of a flexible PSC with an all-carbon electrode and f) the corresponding energy level diagram of each layer. Surface scanning electron microscopy (SEM) images of g) graphene/polyethylene terephthalate (PET) substrate and h) cup-stacked carbon nanotubes (CSCNTs). The insets in (g) and (h) show a photograph of the graphene/PET and CSCNTs,

respectively. Copyright 2018, WILEY-VCH; Reprinted with permission.<sup>495</sup> Schematic diagrams presenting the depletion regions in C-PSC devices i) with and j) without the ferroelectric oxide  $\text{PbTiO}_3$ . k) A schematic of a C-PSC device with  $\text{PbTiO}_3$  and l) the energy level diagram of each layer. Copyright 2019, WILEY-VCH; reprinted with permission.<sup>496</sup>

**Table 10.** Summary of photovoltaic parameters of carbon-based perovskite solar cells with a conventional device configuration and using carbon nanotubes (CNTs) as the back electrode.

| Device configuration                                                                                          | Deposition method | Thermal treatment               | $V_{OC}$<br>(mV) | $J_{SC}$<br>(mA cm <sup>-2</sup> ) | FF   | $\eta$ (%) | Ref. |
|---------------------------------------------------------------------------------------------------------------|-------------------|---------------------------------|------------------|------------------------------------|------|------------|------|
| FTO/c-TiO <sub>2</sub> /mp-TiO <sub>2</sub> /MAPbI <sub>3</sub> /spiro-OMeTAD/Au<br>(control)                 |                   |                                 | 820              | 10.7                               | 0.59 | 5.14       | 490  |
| FTO/c-TiO <sub>2</sub> /mp-TiO <sub>2</sub> /MAPbI <sub>3</sub> /CNTs                                         | Lamination        | -/-                             | 0.88             | 15.46                              | 0.51 | 6.87       | 490  |
| FTO/c-TiO <sub>2</sub> /mp-TiO <sub>2</sub> /MAPbI <sub>3</sub> /spiro-OMeTAD/CNTs                            | Lamination        | -/-                             | 1000             | 18.1                               | 0.55 | 9.9        | 490  |
| FTO/c-TiO <sub>2</sub> /mp-TiO <sub>2</sub> /MAPbI <sub>3</sub> /MWCNTs                                       | Drop-casting      | 50°C/5 min                      | 0.88             | 18.00                              | 0.80 | 12.67      | 491  |
| FTO/c-TiO <sub>2</sub> /mp-TiO <sub>2</sub> /MAPbI <sub>3</sub> /CNTs@P3HT                                    | drop-casting      | 50°C/10 min and<br>100°C/20 min | 0.91             | 22.71                              | 0.65 | 13.43      | 497  |
| FTO/c-TiO <sub>2</sub> /mp-TiO <sub>2</sub> /Al <sub>2</sub> O <sub>3</sub> /CSCNT-25/(MAPbI <sub>3</sub> )   | Physical stacking | -/-                             | 0.878            | 14.43                              | 0.53 | 6.81       | 498  |
| FTO/c-TiO <sub>2</sub> /mp-TiO <sub>2</sub> /Al <sub>2</sub> O <sub>3</sub> /CSCNT-50/(MAPbI <sub>3</sub> )   | Physical stacking | -/-                             | 0.849            | 14.91                              | 0.68 | 8.60       | 498  |
| FTO/c-TiO <sub>2</sub> /mp-TiO <sub>2</sub> /Al <sub>2</sub> O <sub>3</sub> /CSCNT-75/(MAPbI <sub>3</sub> )   | Physical stacking | -/-                             | 0.823            | 15.81                              | 0.64 | 8.35       | 498  |
| FTO/c-TiO <sub>2</sub> /mp-TiO <sub>2</sub> /Al <sub>2</sub> O <sub>3</sub> /T-CSCNT-50/(MAPbI <sub>3</sub> ) | Physical stacking | -/-                             | 0.84             | 16.21                              | 0.69 | 9.37       | 498  |
| FTO/c-TiO <sub>2</sub> /mp-TiO <sub>2</sub> /Al <sub>2</sub> O <sub>3</sub> /I-CSCNT-50/(MAPbI <sub>3</sub> ) | Physical stacking | -/-                             | 0.853            | 17.22                              | 0.71 | 10.54      | 498  |
| FTO/c-TiO <sub>2</sub> /mp-TiO <sub>2</sub> /MAPbI <sub>3</sub> /carbon black: flaky                          | doctor-blading    | 100°C/60 min                    | 0.936            | 19.44                              | 0.64 | 11.72      | 488  |

|                                                                                                                                                                                                      |                    |              |       |       |       |       |     |  |
|------------------------------------------------------------------------------------------------------------------------------------------------------------------------------------------------------|--------------------|--------------|-------|-------|-------|-------|-----|--|
| graphite of 12 500 mesh=1:3 (mass ratio)                                                                                                                                                             |                    |              |       |       |       |       |     |  |
| FTO/c-TiO <sub>2</sub> /mp-TiO <sub>2</sub> /MAPbI <sub>3</sub> /carbon black: 8 µm<br>spheroidal graphite=1:3 (mass ratio)                                                                          | doctor-blading     | 100°C/60 min | 0.941 | 19.76 | 0.68  | 12.63 | 488 |  |
| FTO/c-TiO <sub>2</sub> /mp-TiO <sub>2</sub> /MAPbI <sub>3</sub> /carbon black: flaky<br>graphite of 15,000 mesh=1:3 (mass ratio)                                                                     | doctor-blading     | 100°C/60 min | 0.950 | 20.92 | 0.70  | 13.86 | 488 |  |
| FTO/c-TiO <sub>2</sub> /mp-TiO <sub>2</sub> /MAPbI <sub>3</sub> (incorporated SWCNTs<br>by dripping anti-solvent)/ carbon black: flaky graphite of<br>15,000 mesh=1:3 (mass ratio) containing SWCNTs | doctor-blading     | 100°C/60 min | 0.974 | 22.36 | 0.72  | 15.73 | 488 |  |
| FTO/c-TiO <sub>2</sub> /m-TiO <sub>2</sub> /MAPbI <sub>3</sub> /CNTs                                                                                                                                 | lamination process | -/-          | 0.860 | 16.7  | 0.440 | 6.29  | 490 |  |
| FTO/c-TiO <sub>2</sub> /m-TiO <sub>2</sub> /MAPbI <sub>3</sub> /CNTs                                                                                                                                 | lamination process | -/-          | 0.850 | 9.9   | 0.460 | 3.88* | 490 |  |

Abbreviations: FTO, fluorine-doped tin oxide; MW, multi-walled; SW, single-walled. \*Indicates the efficiency from back side containing semi-transparent CNT electrode

### 3.3.3. Graphene for PSCs

Graphene, a 2D material, possesses excellent electric conductivity and high mobility, transparency, mechanical flexibility, and specific surface area. Thus, graphene is also considered to be an ideal BE with transparency for C-PSCs. Yan *et al.*<sup>499</sup> prepared a semi-transparent PSC by employing stacked multilayer graphene as a transparent BE onto a PEDOT:PSS layer (**Fig. 31a–d**). They deposited the transparent graphene BE on perovskite films by a facile lamination process under pressure at low temperature ( $\approx 60^{\circ}\text{C}$ ), which is compatible with printing and roll-to-roll processing. After optimization, the device with a double-layer graphene BE exhibits the maximum PCE of  $12.02\% \pm 0.32\%$  under illumination from the FTO side and  $11.65\% \pm 0.35\%$  under illumination from the graphene side. Their work indicates that graphene may be an ideal transparent BE material for metal electrode free-based PSCs and tandem photovoltaic devices that utilize perovskite.<sup>500</sup>

Zhu *et al.*<sup>501</sup> developed nitrogen-doped graphene frameworks (N-GFs) as an excellent carbon BE for an HTM-free C-PSC. The WF of the graphene frameworks are decreased from 5.22 eV of GF to 4.92 eV of N-GF, and thus leading to a more efficient hole extraction from the perovskite film to the carbon BE. A C-PSC with a N-GF-based BE shows a PCE of 10.32%, higher than the PCE of a C-PSC using an undoped graphene frameworks (**Fig. 31e–h**). This enhanced performance is probably due to the superiority of N-GFs in enabling increased charge extraction and transport with reduced charge recombination. This work demonstrates that an N-GF may be a potential BE material to replace expensive organic HTM and noble metal electrodes (Au/Ag) for constructing efficient and low-cost HTM-free C-PSC devices.

Considering the difficult deposition of large scale CVD graphene, rGO is another potential carbon BE material for C-PSCs. Yang *et al.*<sup>502</sup> employed rGO to investigate the effects of WF of graphene on device performance (**Fig. 31i–l**). First, GO is chemically cleaved from expanded natural graphite flakes, and then single-layer graphene (SG), with a WF of 4.8 eV, and multilayer graphene (MG), with WF of 5.0 eV, are synthesized from the reduction of their oxide (SGO and MGO, respectively) at 1000°C under an argon atmosphere. Notably, there is a Schottky junction with a rectifying characteristic formed at the MG/perovskite interface that enables effective hole extraction and electron blocking. However, the SG/perovskite interface contact exhibits an ohmic contact behavior with recombination. Thus, the PSC based on a MG BE shows a much high PCE of 11.5%, with a  $J_{sc}$  of 16.7 mA cm<sup>-2</sup>, a FF of 0.73, and a  $V_{oc}$  of 0.943 V, compared to a SG-based PSC, with a PCE of 6.7%, a  $J_{sc}$  of 14.2 mA cm<sup>-2</sup>, a FF of 0.54, and a  $V_{oc}$  of 0.878 V.

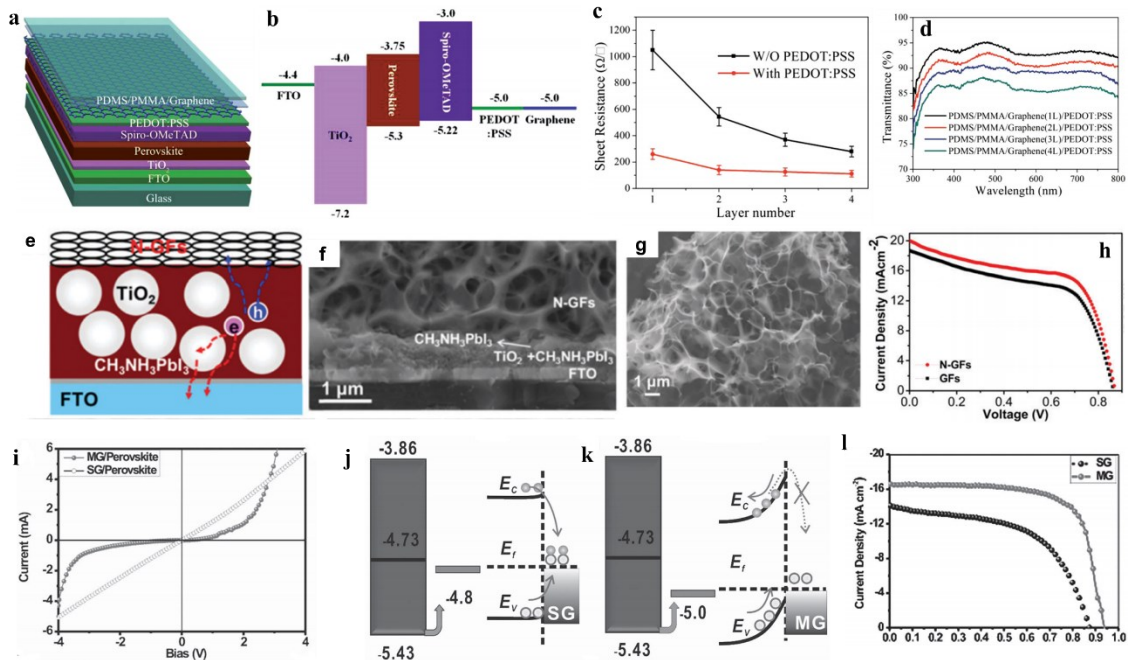

**Fig. 31** a) A schematic for a semitransparent carbon-based perovskite solar cell (C-PSC) and b) the energy level diagram of each related layer. c) The  $R_{sh}$  of one to four layers of

stacked graphene films before and after poly(3,4-ethylenedioxythiophene) polystyrene sulfonate (PEDOT:PSS) doping. d) The UV-Vis transmittance spectra of PEDOT:PSS-doped transparent stacked graphene electrodes that vary in the number of graphene layers. Copyright 2015, WILEY-VCH; reprinted with permission.<sup>499</sup> e) A schematic for a  $\text{TiO}_2/\text{CH}_3\text{NH}_3\text{PbI}_3/\text{N-GF}$  structure layer, a f) cross-sectional scanning electron microscopy (SEM) image of  $\text{TiO}_2/\text{CH}_3\text{NH}_3\text{PbI}_3/\text{N-GF}$  cells, and a g) surface SEM image of nitrogen-doped graphene framework (N-GF) on top of  $\text{TiO}_2/\text{CH}_3\text{NH}_3\text{PbI}_3$ . h) J-V curves of PSCs based on N-GF and GF BEs. Copyright 2018, The Royal Society of Chemistry; reprinted with permission.<sup>501</sup> i) Transport characterization of interface between graphene and perovskite. j) A schematic diagram of ohmic contact in single-layer graphene (SG)/perovskite with possible recombination. k) A schematic diagram of a Schottky junction in multi-layer graphene (MG)/perovskite with directional charge transfer. l) J-V curves for SG- and MG-based PSCs. Copyright 2015, WILEY-VCH; reprinted with permission.<sup>502</sup>

Hu *et al.* prepared a 3D honeycomb-like structured graphene (3DHG) by the reaction of potassium with  $\text{CO}_2$  and employed it as a BE for HTM-free C-PSCs.<sup>503</sup> They deposited the 3DHG on top of perovskite layer by doctor blading. The 3DHG exhibits excellent performance as a BE for an HTM-free C-PSC device, leading to a PCE of 10.06% (**Fig. 32a–f**). Shi *et al.* proposed an innovative modular architecture design for C-PSCs by stacking a semi-cell A and charge collector B together (**Fig. 32g–k**). The individual semi-cell A consisted of  $\text{FTO}/\text{SnO}_2/\text{perovskite}/\text{spiro-OMeTAD}$  and the charge collector B fabricated by spraying a carbon source in isopropyl alcohol onto an FTO substrate.<sup>504</sup> They

compared commercial CB, graphite sheet (GS), and graphene. With graphene, there is sufficient interfacial contact of graphene with adjacent layers through deformation to fit the surface fluctuation of the adjacent functional layers. Thus, graphene is the best carbon BE for C-PSC in this experiment. Based on a graphene BE, a C-PSC device fabricated at low temperatures ( $\leq 85^{\circ}\text{C}$ ) shows the best PCE (up to 18.65%). The prepared device also has excellent stability when exposed to humidity and heating. Moreover, it shows prominent structural flexibility with negligible degradation in efficiency even after repeated disassembly and reassembly (more than 500 times). **Table 11** shows the summary information of carbon-based perovskite solar cells with conventional device configuration and using graphene as a back electrode.

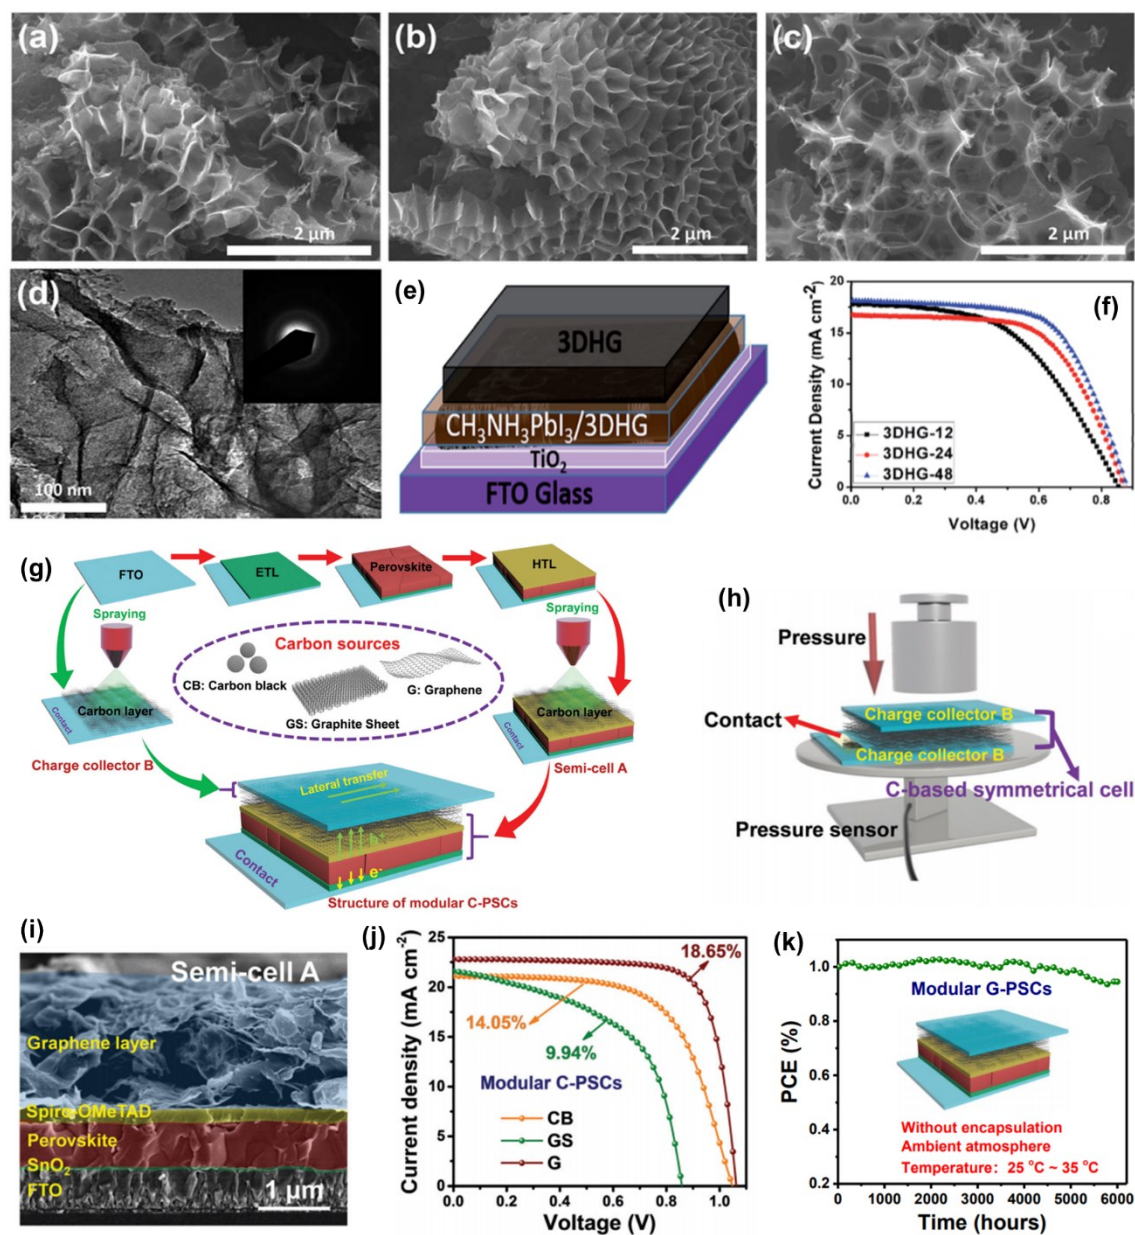

**Fig. 32** Scanning electron microscopy (SEM) images of three-dimensional (3D) graphene sheets prepared using a) 12 h, b) 24 h, and c) 48 h reaction times. (d) A transmission electron microscopy (TEM) image of graphene sheets with the electron diffraction pattern. (e) A device with a 3D honeycomb-like structured graphene (3DHG) back electrode (BE). (f) J-V curves of carbon-based perovskite solar cells (C-PSCs) with different 3DHG BEs. Copyright 2017, The Royal Society of Chemistry; reprinted with permission.<sup>503</sup> (g)

Schematic of the device fabrication process for the modular C-PSCs. The insets show the three carbon source materials. (h) A diagram for testing electromechanical contact properties for stacked symmetrical cell (by stacking two charge collectors B together). (i) Cross-sectional SEM image of graphene-based semi-cell A. (j) J-V curves measured under solar simulator AM 1.5 for modular C-PSCs based on different carbon sources. (k) Long-term stability of modular G-PSC without encapsulation stored in the ambient air (25–35°C and 40–80% humidity). Copyright 2019, The Royal Society of Chemistry; reprinted with permission.<sup>504</sup>

905 **Table 11** Summary of photovoltaic parameters on carbon-based perovskite solar cells with a conventional device configuration and using graphene  
906 as a back electrode.

| Device configuration                                                                                                                                                                   | Deposition method            | Thermal treatment | $V_{OC}$<br>(mV) | $J_{SC}$<br>(mA cm <sup>-2</sup> ) | FF    | $\eta$<br>(%) | Ref. |
|----------------------------------------------------------------------------------------------------------------------------------------------------------------------------------------|------------------------------|-------------------|------------------|------------------------------------|-------|---------------|------|
| FTO/c-TiO <sub>2</sub> /mp-TiO <sub>2</sub> /MAPbI <sub>3</sub> /single-layer graphene                                                                                                 | drop-casting                 | 120°C/60 min      | 0.878            | 14.2                               | 0.54  | 6.7%          | 502  |
| FTO/c-TiO <sub>2</sub> /mp-TiO <sub>2</sub> /MAPbI <sub>3</sub> /multi-layer graphene                                                                                                  | drop-casting                 | 120°C/60 min      | 0.943            | 16.7                               | 0.73  | 11.5%         | 502  |
| FTO/c-TiO <sub>2</sub> /mp-TiO <sub>2</sub> /MAPbI <sub>3</sub> /three-dimensional mesoporous graphene                                                                                 | doctor-blading               | 80°C/240 min      | 0.78             | 18.00                              | 0.58  | 8.18%         | 502  |
| FTO/c-TiO <sub>2</sub> /mp-TiO <sub>2</sub> /MAPbI <sub>3</sub> /N-GFs                                                                                                                 | drop-casting                 | 100°C/5min        | 0.87             | 20.02                              | 0.59  | 10.32         | 501  |
| FTO/c-TiO <sub>2</sub> /mp-TiO <sub>2</sub> /MAPbI <sub>3</sub> /GFs                                                                                                                   | drop-casting                 | 100°C/5 min       | 0.86             | 18.69                              | 0.56  | 8.98          | 501  |
| FTO/SnO <sub>2</sub> /Cs <sub>5</sub> (MA <sub>0.17</sub> FA <sub>0.83</sub> ) <sub>95</sub> Pb(I <sub>0.83</sub> Br <sub>0.17</sub> ) <sub>3</sub> /doped spiro-OMeTAD/CB             | Spraying & physical stacking | 85°C/-            | 1.04             | 21.11                              | 0.64  | 14.05         | 504  |
| FTO/SnO <sub>2</sub> /Cs <sub>5</sub> (MA <sub>0.17</sub> FA <sub>0.83</sub> ) <sub>95</sub> Pb(I <sub>0.83</sub> Br <sub>0.17</sub> ) <sub>3</sub> /doped spiro-OMeTAD/graphene sheet | Spraying & physical stacking | 85°C/-            | 0.84             | 21.52                              | 0.55  | 9.94          | 504  |
| FTO/SnO <sub>2</sub> /Cs <sub>5</sub> (MA <sub>0.17</sub> FA <sub>0.83</sub> ) <sub>95</sub> Pb(I <sub>0.83</sub> Br <sub>0.17</sub> ) <sub>3</sub> /doped spiro-OMeTAD/graphene       | Spraying & physical stacking | 85°C/-            | 1.05             | 22.78                              | 0.78  | 18.65         | 504  |
| FTO/c-TiO <sub>2</sub> /MAPbI <sub>3</sub> /3DHG-12                                                                                                                                    | doctor-blade                 | 120°C/60 min      | 0.87             | 17.79                              | 0.50  | 7.71          | 503  |
| FTO/c-TiO <sub>2</sub> /MAPbI <sub>3</sub> /3DHG-24                                                                                                                                    | doctor-blade                 | 120°C/60 min      | 0.87             | 16.75                              | 0.62  | 9.01          | 503  |
| FTO/c-TiO <sub>2</sub> /MAPbI <sub>3</sub> /3DHG-48                                                                                                                                    | doctor-blade                 | 120°C/60 min      | 0.89             | 18.11                              | 0.63  | 10.06         | 503  |
| FTO/c-TiO <sub>2</sub> /MAPbI <sub>3</sub> /spiro-OMeTAD/PEDOT:PSS/graphene (2 layer)                                                                                                  | lamination process           | 65°C/-            | 0.96             | 19.17                              | 0.672 | 12.37         | 499  |

|                                                                                          |                    |        |       |       |       |        |     |
|------------------------------------------------------------------------------------------|--------------------|--------|-------|-------|-------|--------|-----|
| FTO/c-TiO <sub>2</sub> /MAPbI <sub>3</sub> /spiro-OMeTAD/PEDOT:PSS/graphene (2<br>layer) | lamination process | 65°C/- | 0.945 | 17.75 | 0.717 | 12.03* | 499 |
|------------------------------------------------------------------------------------------|--------------------|--------|-------|-------|-------|--------|-----|

907 Abbreviations: 3DHG, three-dimensional honeycomb-like structured graphene; FTO, fluorine-doped tin oxide; N-GF, nitrogen-doped graphene framework; PEDOT:SS,  
908 poly(3,4-ethylenedioxythiophene) polystyrene sulfonate. \*Indicates the efficiency from back side containing semi-transparent graphene electrode.

**4. Conclusions and Outlooks:** The CE/BE is a key component in DSSCs and PSCs and plays a critical role in the photovoltaic efficiency of the devices. The CE in DSSCs must possess high electrocatalytic ability, high conductivity, high electrochemical and mechanical stability, and good adhesivity with FTO. These properties may increase  $V_{OC}$ ,  $J_{SC}$ , and FF and, consequently, the PCE of the DSSC. Pt satisfies most of the properties and has been widely employed as the standard CE in DSSCs; however, Pt is a costly and scarce noble metal, and it is thus difficult to use for large-scale applications. Carbon-based materials are promising substitutes for a Pt CE due to their low cost, scalability, and long-term stability. Numerous carbon-based materials, like CB, porous carbon, graphite, graphene, CNTs, and CNFs, have been successfully employed as CEs in DSSCs. The main disadvantages of carbon-based CEs are their low catalytic activity and conductivity compared to a Pt CE, as well as the large quantity required to obtain the desired catalytic activity. Therefore, researchers have attempted to increase the surface area and modify the surface of carbon-based materials through heteroatom doping (N, O, S, B, and P), as well as the incorporation of metals, metalloids, metal oxides, alloy, and polymer to achieve the anticipated performance of the devices.

Among the different types of amorphous carbons, N-doped mesoporous carbon is one of the best choices for a CE in DSSCs. A large surface area increases the catalytic active sites, while heteroatom doping redistributes the spin and charge density of the carbon network and creates highly efficient active sites, where reactant molecules interact more competently. Besides, different defect positions or heteroatoms in carbon substrate may be exploited as active sites for nucleation and growth of metal NPs, which can stabilize the deposited metal NPs that have a small size and narrow distribution.<sup>54</sup> Additionally, a doped carbon substrate enhances the surface roughness and oxygen vacancies of metal NPs and metal oxides, factors that also improve the catalytic activity of carbon composites.

Notably, functionalized graphene shows the best catalytic activity toward the iodine and cobalt reduction reaction in DSSCs. Topological defects and the dangling bonds located at the edge of  $sp^2$ -hybridized carbon basal planes usually render high-energy sites and catalytic centers. Graphene nanoplatelet (GNP) composites, where edge sites are only catalytic sites, as CE in DSSCs, show the highest efficiency.<sup>214,218,505,506</sup> Conversely, CNTs and CNFs show lower efficiency compared to functionalized graphene due to fewer active sites and limited capability for functionalization. Due to their higher flexibility and mechanical stability, CNTs and CNFs are the only choice for flexible, stretchable, or wire-shaped DSSCs.<sup>309,310,368</sup> However, engineering specific catalytic sites in different carbon materials remains challenging. Thus, more investigations are required to develop a synthetic approach to create well-defined active sites in various carbon-based catalysts. Furthermore, researchers should consider the adjustability of designed CE materials for different electrolytes employed in DSSCs.

Unlike the CE in DSSCs, the catalytic activity of a carbon CE is not required for a BE in PSCs. Carbon materials are cost effective, highly stable, and have a Fermi energy level that is close to an Au electrode. Considering these aspects, carbon materials may be the ideal BE materials for PSCs. However, the efficiency of C- PSCs is relatively low, and there is a gap of over 25% comparing with metal BE-based PSCs, as summarized in **Tables 8–11**. To minimize this large gap, the following aspects should be considered for developing efficient carbon BEs for C-PSCs. For mesoscopic triple layer type of C-PSCs: 1) a carbon BE must have good conductivity; 2) a carbon BE must have a suitable WF for a better energy level alignment of carbon-based materials with perovskite to ensure efficient hole selectively extraction; 3) the mesoporous carbon layer should have a suitable morphology to allow for efficient perovskite precursor filtration and interfacial contact in perovskite/carbon film; 4) there should be an efficient insulating layer with a wide bandgap, high porosity, and pore size >100 nm with ultra-film thickness.<sup>425</sup> For conventional insulating layer-free C-PSCs: 1) a carbon BE must have

good conductivity; 2) the carbon BE must have a suitable WF for a better energy level alignment; 3) the processing solvent for carbon paste should not damage the perovskite film; and 4) a suitable organic and inorganic HTM should be inserted to enhance the HTM/carbon composite hole selectively extraction and collection. Furthermore, to improve heterogeneous contact at the carbon BE/perovskite or BE/HTM/perovskite interface, chemical binding, different solvent engineering, and fabrication processes should be investigated, all of which may decrease interfacial recombination. Finally, CNT and CVD graphene may be a potential transparent BE for a bifacial C-PSC<sup>490,499</sup> or as a metal-free transparent electrode for a tandem solar cells that involve perovskite.<sup>500</sup> In addition, a low-processing temperature for C-PSCs allows their application in flexible devices.

## **Conflicts of interest**

The authors declare no conflicts of interest.

## **Acknowledgements**

This work was supported by the Korean government (Ministry of Science, ICT, and Future Planning) through the Mid-career Researcher Program (NRF-2017R1A2A1A17069374). The Human Resources Program in Energy Technology of the Korea Institute of Energy Technology Evaluation and Planning (KETEP) granted financial resources from the Ministry of Trade, Industry & Energy, Republic of Korea (KETEP-20204030200070).

## References

- 1 D. Spencer, *Ed. BP Stat. Rev. World Energy*, 2019, 1–69.
- 2 U.S. Energy Information Administration, *International Energy Outlook 2016*, 2016, vol. 0484(2016).
- 3 F. S. Fabiani Appavou, Adam Brown, Bärbel Epp, Duncan Gibb, Bozhil Kondev, Angus McCrone, Hannah E. Murdock, Evan Musolino, Lea Ranalder, Janet L. Sawin, Kristin Seyboth, Jonathan Skeen, *REN21 - 2019 Global Status Report*, 2019.
- 4 United Nations Development Programme, *World Energy Assessment. Energy and the challenge of Sustainability*, 2000.
- 5 V. Smil, *General Energetics: Energy in the Biosphere and Civilization*, John Wiley, New York, 1991.
- 6 D. M. Bagnall and M. Boreland, *Energy Policy*, 2008, **36**, 4390–4396.
- 7 A. Polman, M. Knight, E. C. Garnett, B. Ehrler and W. C. Sinke, *Science*, 2016, **352**, 4424–4424.
- 8 S. Sharma, Bulkesh Siwach, S. K. Ghoshal and D. Mohan, *Renew. Sustain. Energy Rev.*, 2017, **70**, 529–537.
- 9 M. A. Green, Y. Hishikawa, W. Warta, E. D. Dunlop, D. H. Levi, J. Hohl-Ebinger and A. W. H. Ho-Baillie, *Prog. Photovoltaics Res. Appl.*, 2017, **25**, 668–676.
- 10 M. A. Green, *Sol. Energy*, 2004, **76**, 3–8.
- 11 M. A. Green, *Prog. Photovoltaics Res. Appl.*, 2001, **9**, 123–135.
- 12 K. Yoshikawa, H. Kawasaki, W. Yoshida, T. Irie, K. Konishi, K. Nakano, T. Uto, D. Adachi, M. Kanematsu, H. Uzu and K. Yamamoto, *Nat. Energy*, 2017, **2**, 17032.

- 13 J. M. Ji, H. Zhou, Y. K. Eom, C. H. Kim and H. K. Kim, *Adv. Energy Mater.*, 2020, **10**, 1–12.
- 14 K. Kakiage, Y. Aoyama, T. Yano, K. Oya, J. Fujisawa and M. Hanaya, *Chem. Commun.*, 2015, **51**, 15894–15897.
- 15 M. A. Green, E. D. Dunlop, J. Hohl-Ebinger, M. Yoshita, N. Kopidakis and A. W. Y. Ho-Baillie, *Prog. Photovoltaics Res. Appl.*, 2020, **28**, 3–15.
- 16 Y. R. and K. H. Komiya R, Fukui A, Murofushi N, Koide N, *Tech. Dig.*, 2011, **21st Inter**, 2C-5O-08.
- 17 Q. Zhang, K. Park, J. Xi, D. Myers and G. Cao, *Adv. Energy Mater.*, 2011, **1**, 988–1001.
- 18 A. Hagfeldt, G. Boschloo, L. Sun, L. Kloo and H. Pettersson, *Chem. Rev.*, 2010, **110**, 6595–6663.
- 19 H. Michaels, M. Rinderle, R. Freitag, I. Benesperi, T. Edvinsson, R. Socher, A. Gagliardi and M. Freitag, *Chem. Sci.*, 2020, **11**, 2895–2906.
- 20 M. Freitag, J. Teuscher, Y. Saygili, X. Zhang, F. Giordano, P. Liska, J. Hua, S. M. Zakeeruddin, J. E. Moser, M. Grätzel and A. Hagfeldt, *Nat. Photonics*, 2017, **11**, 372–378.
- 21 S. Yoon, S. Tak, J. Kim, Y. Jun, K. Kang and J. Park, *Build. Environ.*, 2011, **46**, 1899–1904.
- 22 Y. Cao, Y. Liu, S. M. Zakeeruddin, A. Hagfeldt and M. Grätzel, *Joule*, 2018, **2**, 1108–1117.

- 23 File:Breakdown of the incoming solar energy.jpg - Wikipedia,  
[https://en.wikipedia.org/wiki/File:Breakdown\\_of\\_the\\_incoming\\_solar\\_energy.jpg](https://en.wikipedia.org/wiki/File:Breakdown_of_the_incoming_solar_energy.jpg),  
(accessed 2 April 2020).
- 24 J. K. B. Bishop, *J. Geophys. Res.*, 1991, **96**, 839–858.
- 25 Best Research-Cell Efficiency Chart, <https://www.nrel.gov/pv/assets/pdfs/best-research-cell-efficiencies.20200406.pdf>, (accessed 13 July 2020).
- 26 M. Aftabuzzaman and H. K. Kim, *Emerg. Sol. Energy Mater.*, 2018,  
DOI:10.5772/intechopen.75398.
- 27 M. Wu, M. Sun, H. Zhou, J. Y. Ma and T. Ma, *Adv. Funct. Mater.*, 2019, **1906451**, 1–34.
- 28 L. Fagiolari and F. Bella, *Energy Environ. Sci.*, 2019, **12**, 3437–3472.
- 29 C. Zhou and S. Lin, *Sol. RRL*, 2020, **4**, 1900190.
- 30 J. Theerthagiri, A. R. Senthil, J. Madhavan and T. Maiyalagan, *ChemElectroChem*, 2015, **2**, 928–945.
- 31 G. Grancini, C. Roldán-Carmona, I. Zimmermann, E. Mosconi, X. Lee, D. Martineau, S. Narbey, F. Oswald, F. De Angelis, M. Graetzel and M. K. Nazeeruddin, *Nat. Commun.*, 2017, **8**, 15684.
- 32 J. Wu, Y. Li, Q. Tang, G. Yue, J. Lin, M. Huang and L. Meng, *Sci. Rep.*, 2015, **4**, 4028.
- 33 T. N. Murakami and M. Grätzel, *Inorganica Chim. Acta*, 2008, **361**, 572–580.
- 34 J. B. Baxter, *J. Vac. Sci. Technol. A Vacuum, Surfaces, Film.*, 2012, **30**, 020801.
- 35 K. Li, Z. Yu, Y. Luo, D. Li and Q. Meng, *J. Mater. Sci. Technol.*, 2007, **23**, 577.

- 36 F. Fabregat-Santiago, J. Bisquert, E. Palomares, L. Otero, D. Kuang, S. M. Zakeeruddin and M. Grätzel, *J. Phys. Chem. C*, 2007, **111**, 6550–6560.
- 37 B. Zhang, D. Wang, Y. Hou, S. Yang, X. H. Yang, J. H. Zhong, J. Liu, H. F. Wang, P. Hu, H. J. Zhao and H. G. Yang, *Sci. Rep.*, 2013, **3**, 1836.
- 38 J. Wu, Y. Li, Q. Tang, G. Yue, J. Lin, M. Huang and L. Meng, , DOI:10.1038/srep04028.
- 39 K. Kalyanasundaram and M. Grätzel, *Coord. Chem. Rev.*, 1998, **77**, 347–414.
- 40 S. Thomas, T. G. Deepak, G. S. Anjusree, T. A. Arun, S. V Nair and A. S. Nair, *J. Mater. Chem. A*, 2014, **2**, 4474–4490.
- 41 L. Wang, M. Al-Mamun, P. Liu, Y. Wang, H. G. Yang, H. F. Wang and H. Zhao, *NPG Asia Mater.*, **7**, e226.
- 42 M. Seo, K. Fushimi, H. Takahashi, K. Aotsuka, K. Fujimoto, M. Nagayama, H. Konno, K. Kobayashi, K. Shimizu, D. Teranishi, J. Mater, K. Fujiwara, F. Takashima, M. Al-Odan, W. H. Smyrl, N. Papageorgiou, W. F. Maier and M. Grätzel, *J. Electrochem. Soc.*, 1997, **144**, 257–1349.
- 43 N. Papageorgiou, *Coord. Chem. Rev.*, 2004, **248**, 1421–1446.
- 44 G. Veerappan, K. Bojan and S. W. Rhee, *ACS Appl. Mater. Interfaces*, 2011, **3**, 857–862.
- 45 Y. S. Wei, Q. Q. Jin and T. Z. Ren, *Solid. State. Electron.*, 2011, **63**, 76–82.
- 46 L. Kavan, J. H. Yum and M. Grätzel, *Nano Lett.*, 2011, **11**, 5501–5506.
- 47 L. Kavan, J. H. Yum, M. K. Nazeeruddin and M. Grätzel, *ACS Nano*, 2011, **5**, 9171–9178.

- 48 K. Gao, B. Wang, L. Tao, B. V. Cuning, Z. Zhang, S. Wang, R. S. Ruoff and L. Qu, *Adv. Mater.*, 2019, **31**, 1–11.
- 49 Y. Xu, M. Kraft and R. Xu, *Chem. Soc. Rev.*, 2016, **45**, 3039–3052.
- 50 W. C. Oh and Y. Areerob, *ACS Appl. Mater. Interfaces*, 2019, **11**, 38859–38867.
- 51 M. S. Mahmoud, M. Motlak and A. M. Barakat, *Catalysts*, 2019, **9**, 139.
- 52 C. K. Kim, H. Zhou, T. Kowalewski, K. Matyjaszewski and H. K. Kim, *ACS Appl. Mater. Interfaces*, 2019, **11**, 2093–2102.
- 53 W. Yang, Z. Li, X. Xu, L. Hou, Y. Tang, B. Deng, F. Yang, Y. Wang and Y. Li, *Chem. Eng. J.*, 2018, **349**, 782–790.
- 54 Y. Cao, S. Mao, M. Li, Y. Chen and Y. Wang, *ACS Catal.*, 2017, **7**, 8090–8112.
- 55 File:Eight Allotropes of Carbon.png - Wikipedia,  
[https://en.wikipedia.org/wiki/File:Eight\\_Allotropes\\_of\\_Carbon.png](https://en.wikipedia.org/wiki/File:Eight_Allotropes_of_Carbon.png), (accessed day month year).
- 56 J. Lim, S. Y. Ryu, J. Kim and Y. Jun, *Nanoscale Res. Lett.*, 2013, **8**, 227.
- 57 A. Kay and M. Grätzel, *Sol. Energy Mater. Sol. Cells*, 1996, **44**, 99–117.
- 58 T. N. Murakami, S. Ito, Q. Wang, M. K. Nazeeruddin, T. Bessho, I. Cesar, P. Liska, R. Humphry-Baker, P. Comte, P. Péchy and M. Grätzel, *J. Electrochem. Soc.*, 2006, **153**, A2255.
- 59 C.-S. Wu, T.-W. Chang, H. Teng and Y.-L. Lee, *Energy*, 2016, **115**, 513–518.
- 60 I. P. Liu, Y. C. Hou, C. W. Li and Y. L. Lee, *J. Mater. Chem. A*, 2017, **5**, 240–249.
- 61 M. Bagavathi, A. Ramar and R. Saraswathi, *Ceram. Int.*, 2016, **42**, 13190–13198.

- 62 C.-T. Li, C.-T. Lee, S.-R. Li, C.-P. Lee, I.-T. Chiu, R. Vittal, N.-L. Wu, S.-S. Sun and K.-C. Ho, *J. Power Sources*, 2016, **302**, 155–163.
- 63 C.-S. Wu, S. Venkatesan, T.-W. Chang and Y.-L. Lee, *J. Solid State Electrochem.*, 2018, **22**, 255–262.
- 64 B. C. Nath, K. J. Mohan, R. Barua, G. A. Ahmed and S. K. Dolui, *J. Photochem. Photobiol. A Chem.*, 2017, **348**, 33–40.
- 65 A. Bora, K. Mohan, P. Phukan and S. K. Dolui, *Electrochim. Acta*, 2018, **259**, 233–244.
- 66 J. Zhang, H. Long, S. G. Miralles, J. Bisquert, F. Fabregat-Santiago and M. Zhang, *Phys. Chem. Chem. Phys.*, 2012, **14**, 7131.
- 67 G. Kang, J. Choi and T. Park, *Sci. Rep.*, 2016, **6**, 22987.
- 68 C. S. Wu, S. Venkatesan, T. W. Chang and Y. L. Lee, *J. Solid State Electrochem.*, 2018, **22**, 255–262.
- 69 W. R. Lee, Y. S. Jun, J. Park and G. D. Stucky, *J. Mater. Chem. A*, 2015, **3**, 24232–24236.
- 70 M. Li, C. Yu, C. Hu, C. Zhao, M. Zhang, Y. Ding, X. Wang and J. Qiu, *Green Chem.*, 2018, **20**, 250–254.
- 71 S. Q. Guo, L. C. Wang, C. G. Zhang, G. C. Qi, B. C. Gu, L. Liu and Z. H. Yuan, *Nanoscale*, 2017, **9**, 6837–6845.
- 72 J. Li, X. Li, T. Wang, P. He, F. Li, W. Chen and E. Wang, *ACS Appl. Energy Mater.*, 2019, **2**, 5824–5834.

- 73 C. F. Lin, Y. C. Chou, J. F. Haung, P. H. Chen, H. C. Han, K. Y. Chiu and Y. O. Su, *Jpn. J. Appl. Phys.*, 2016, **55**, 1–6.
- 74 I.-P. Liu, Y.-C. Hou, C.-W. Li and Y.-L. Lee, *J. Mater. Chem. A*, 2017, **5**, 240–249.
- 75 W. Ahmad, L. Chu, M. R. Al-Bahrani, Z. Yang, S. Wang, L. Li and Y. Gao, *RSC Adv.*, 2015, **5**, 35635–35642.
- 76 G. Wang, J. Zhang and S. Hou, *Mater. Res. Bull.*, 2016, **76**, 454–458.
- 77 Y. Wang, N. Fu, P. Ma, Y. Fang, L. Peng, X. Zhou and Y. Lin, *Appl. Surf. Sci.*, 2017, **419**, 670–677.
- 78 A. Bora, K. Mohan, P. Phukan and S. K. Dolui, *Electrochim. Acta*, 2018, **259**, 233–244.
- 79 A. S. A. Ahmed, W. Xiang, A. Gu, X. Hu, I. A. Saana and X. Zhao, *New J. Chem.*, 2018, **42**, 11715–11723.
- 80 M. U. Rahman, F. Xie, X. Sun and M. Wei, *J. Electroanal. Chem.*, 2019, **848**, 113317.
- 81 H. Jing, D. Wu, S. Liang, X. Song, Y. An, C. Hao and Y. Shi, *J. Energy Chem.*, 2019, **31**, 89–94.
- 82 K. D. M. S. P. K. Kumarasinghe, G. R. A. Kumara, R. M. G. Rajapakse, D. N. Liyanage and K. Tennakone, *Org. Electron.*, 2019, **71**, 93–97.
- 83 K. Lee, S. Cho, M. Kim, J. Kim, J. Ryu, K. Y. Shin and J. Jang, *J. Mater. Chem. A*, 2015, **3**, 19018–19026.
- 84 C. T. Li, Y. F. Lin, I. T. Chiu and K. C. Ho, *J. Mater. Chem. A*, 2015, **3**, 24479–24486.
- 85 I. T. Chiu, C. T. Li, C. P. Lee, P. Y. Chen, Y. H. Tseng, R. Vittal and K. C. Ho, *Nano Energy*, 2016, **22**, 594–606.

- 86 X. Cui, Z. Xie and Y. Wang, *Nanoscale*, 2016, **8**, 11984–11992.
- 87 C. Zhu, F. Xu, J. Chen, H. Min, H. Dong, L. Tong, K. Qasim, S. Li and L. Sun, *J. Power Sources*, 2016, **303**, 159–167.
- 88 P. Sun, M. Zhang, C. Ai, Z. Wu, S. Lu, X. Zhang, N. Huang, Y. Sun and X. Sun, *J. Power Sources*, 2016, **319**, 219–226.
- 89 C. Xiang, T. Lv, C. A. Okonkwo, M. Zhang, L. Jia and W. Xia, *J. Electrochem. Soc.*, 2017, **164**, H203–H210.
- 90 Y. Duan, N. Fu, S. Li, X. Yang, J. Zheng, Y. Lin and F. Pan, *J. Mater. Chem. A*, 2017, **5**, 6884–6892.
- 91 W. Zhu, Y. Zhao, J. Duan, Y. Duan, Q. Tang and B. He, *Chem. Commun.*, 2017, **53**, 9894–9897.
- 92 C. Gao, H. Wang, Q. Han, Z. Hu and M. Wu, *Electrochim. Acta*, 2018, **264**, 312–318.
- 93 Y. Ding, N. Huang, S. Yan, R. Peng, P. Sun, X. Sun and C. Huang, *J. Alloys Compd.*, 2018, **767**, 848–855.
- 94 Y. Zhang, Y. Zhao, J. Duan and Q. Tang, *Electrochim. Acta*, 2018, **261**, 588–595.
- 95 Y. Di, S. Jia, N. Li, C. Hao, H. Zhang and S. Hu, *Org. Electron.*, 2020, **76**, 105395.
- 96 M. Chen, L.-L. Shao, X. Qian, L. Liu, T.-Z. Ren and Z.-Y. Yuan, *Chem. Eng. J.*, 2014, **256**, 23–31.
- 97 Q. W. Jiang, G. R. Li, F. Wang and X. P. Gao, *Electrochem. Commun.*, 2010, **12**, 924–927.
- 98 H. K. Kim, M. Aftabuzzaman, C. K. Kim, T. Kowalewski and K. Matyjaszewski, *J. Mater. Chem. A*, 2019, **7**, 20208–20222.

- 99 Z. Huang, X. Liu, K. Li, D. Li, Y. Luo, H. Li, W. Song, L. Q. Chen and Q. Meng, *Electrochem. commun.*, 2007, **9**, 596–598.
- 100 K. Imoto, K. Takahashi, T. Yamaguchi, T. Komura, J. I. Nakamura and K. Murata, *Sol. Energy Mater. Sol. Cells*, 2003, **79**, 459–469.
- 101 B. Fang, S. Q. Fan, J. H. Kim, M. S. Kim, M. Kim, N. K. Chaudhari, J. Ko and J. S. Yu, *Langmuir*, 2010, **26**, 11238–11243.
- 102 E. Ramasamy and J. Lee, *Chem. Commun.*, 2010, **46**, 2136.
- 103 B. Zhao, H. Huang, P. Jiang, H. Zhao, X. Huang, P. Shen, D. Wu, R. Fu and S. Tan, *J. Phys. Chem. C*, 2011, **115**, 22615–22621.
- 104 L. L. Shao, M. Chen and Z. Y. Yuan, *J. Power Sources*, 2014, **272**, 1091–1099.
- 105 D. Y. Chung, Y. J. Son, J. M. Yoo, J. S. Kang, C.-Y. Ahn, S. Park and Y.-E. Sung, *ACS Appl. Mater. Interfaces*, 2017, **9**, 41303–41313.
- 106 C. Wang, F. Meng, M. Wu, X. Lin, T. Wang, J. Qiu and T. Ma, *Phys. Chem. Chem. Phys.*, 2013, **15**, 14182.
- 107 R. Gokhale, S. Agarkar, J. Debgupta, D. Shinde, B. Lefez, A. Banerjee, J. Jog, M. More, B. Hannoyer and S. Ogale, *Nanoscale*, 2012, **4**, 6730.
- 108 A. S. Mestre, E. Tyszkowski, M. A. Andrade, M. Galhetas, C. Freire and A. P. Carvalho, *RSC Adv.*, 2015, **5**, 19696–19707.
- 109 H. Marsh and F. Rodríguez-Reinoso, *Activated Carbon*, Elsevier Science, Amsterdam, 2006.
- 110 E. Raymundo-Piñero, P. Azaïs, T. Cacciaguerra, D. Cazorla-Amorós, A. Linares-Solano and F. Béguin, *Carbon N. Y.*, 2005, **43**, 786–795.

- 111 A. J. Romero-Anaya, M. Ouzzine, M. A. Lillo-Ródenas and A. Linares-Solano, *Carbon N. Y.*, 2014, **68**, 296–307.
- 112 X. Liu, *Nano Adv.*, 2016, **1**, 90–103.
- 113 S. Fajardo, García-Galvan, F. R., V. Barranco, J. C. Galvan and S. F. Batlle, *Intech*, 2016, **i**, 13.
- 114 K. Yajima, H. Matsuura and F. Tsukihashi, *ISIJ Int.*, 2009, **49**, 10–16.
- 115 M. Sevilla and A. B. Fuertes, *ChemSusChem*, 2016, **9**, 1880–1888.
- 116 J. Wang and S. Kaskel, *J. Mater. Chem.*, 2012, **22**, 23710.
- 117 X. Liu and M. Antonietti, *Adv. Mater.*, 2013, **25**, 6284–6290.
- 118 D. Y. Chung, Y. J. Son, J. M. Yoo, J. S. Kang, C. Y. Ahn, S. Park and Y. E. Sung, *ACS Appl. Mater. Interfaces*, 2017, **9**, 41303–41313.
- 119 C. K. Kim, I. T. Choi, S. H. Kang and H. K. Kim, *RSC Adv.*, 2017, **7**, 35565–35574.
- 120 G. Hasegawa, T. Deguchi, K. Kanamori, Y. Kobayashi, H. Kageyama, T. Abe and K. Nakanishi, *Chem. Mater.*, 2015, **27**, 4703–4712.
- 121 L. Wang, Z. Gao, J. Chang, X. Liu, D. Wu, F. Xu, Y. Guo and K. Jiang, *ACS Appl. Mater. Interfaces*, 2015, **7**, 20234–20244.
- 122 C. Wang, S. Yun, Q. Fan, Z. Wang, Y. Zhang, F. Han, Y. Si and A. Hagfeldt, *J. Mater. Chem. A*, 2019, **7**, 14864–14875.
- 123 M. Baro, Jaidev and S. Ramaprabhu, *RSC Adv.*, 2016, **6**, 96109–96120.
- 124 G. Nagaraju, J. H. Lim, S. M. Cha and J. S. Yu, *J. Alloys Compd.*, 2017, **693**, 1297–1304.

- 125 G. Wang, C. Yan, S. Hou and W. Zhang, *Mater. Sci. Semicond. Process.*, 2017, **63**, 190–195.
- 126 P. Ma, W. Lu, X. Yan, W. Li, L. Li, Y. Fang, X. Yin, Z. Liu and Y. Lin, *RSC Adv.*, 2018, **8**, 18427–18433.
- 127 S. M. Cha, G. Nagaraju, S. C. Sekhar, L. K. Bharat and J. S. Yu, *J. Colloid Interface Sci.*, 2018, **513**, 843–851.
- 128 M. Baro, J. Harjwani and S. Ramaprabhu, *IEEE J. Photovoltaics*, 2019, **9**, 700–709.
- 129 C. Wang, S. Yun, H. Xu, Z. Wang, F. Han, Y. Zhang, Y. Si and M. Sun, *Ceram. Int.*, 2019, **46**, 3292–3303.
- 130 M. Baro, Jaidev and S. Ramaprabhu, *Appl. Surf. Sci.*, 2020, **503**, 144069.
- 131 G. Wang, W. Dong, P. Ma, C. Yan, W. Zhang and J. Liu, *Electrochim. Acta*, 2018, **290**, 273–281.
- 132 L. Wang, Z. Gao, J. Chang, X. Liu, D. Wu, F. Xu, Y. Guo and K. Jiang, *ACS Appl. Mater. Interfaces*, 2015, **7**, 20234–20244.
- 133 A. A. Memon, A. A. Arbab, I. A. Sahito, N. Mengal, K. C. Sun, M. B. Qadir, Y. S. Choi and S. H. Jeong, *Electrochim. Acta*, 2017, **234**, 53–62.
- 134 A. A. Memon, A. A. Arbab, I. A. Sahito, K. C. Sun, N. Mengal and S. H. Jeong, *Sol. Energy*, 2017, **150**, 521–531.
- 135 Y. Zhang, S. Yun, C. Wang, Z. Wang, F. Han and Y. Si, *J. Power Sources*, 2019, **423**, 339–348.
- 136 K. Wu, Z. Liu, M. Wu, B. Ruan, R. Wu, H. Zhou and M. Wu, *J. Electroanal. Chem.*, 2019, **835**, 150–155.

- 137 S. Yun, X. Zhou, Y. Zhang, C. Wang and Y. Hou, *Electrochim. Acta*, 2019, **309**, 371–381.
- 138 L. Li, C. L. Wang, J. Y. Liao and A. Manthiram, *J. Power Sources*, 2015, **300**, 254–260.
- 139 M. Wu, Y. nan Lin, H. Guo, W. Li, Y. Wang and X. Lin, *Nano Energy*, 2015, **11**, 540–549.
- 140 X. Liu, C. Giordano and M. Antonietti, *Small*, 2014, **10**, 193–200.
- 141 Z. Sun, W. Wang, J. Zhang, G. Wang, K. Wang, X. Liu, G. Ni and Y. Jiang, *New J. Chem.*, 2019, **43**, 1864–1873.
- 142 T. Morishita, T. Tsumura, M. Toyoda, J. Przepiórski, A. W. Morawski, H. Konno and M. Inagaki, *Carbon N. Y.*, 2010, **48**, 2690–2707.
- 143 C. Zhu and T. Akiyama, *Green Chem.*, 2016, **18**, 2106–2114.
- 144 Z. Li, W. Yang, X. Xu, Y. Tang, Z. Zeng, F. Yang, L. Zhang, G. Ning, C. Xu and Y. Li, *J. Power Sources*, 2016, **327**, 289–296.
- 145 J. Li, Q. Jiang, L. Wei, L. Zhong and X. Wang, *J. Mater. Chem. A*, 2020, **8**, 1469–1479.
- 146 L. Kong, M. Liu, Z. Diao, D. Chen, X. Chang and Y. Xiong, *Sci. Rep.*, 2016, **6**, 1–9.
- 147 J. Wang, C. Zhang, Y. Shen, Z. Zhou, J. Yu, Y. Li, W. Wei, S. Liu and Y. Zhang, *J. Mater. Chem. A*, 2015, **3**, 5126–5131.
- 148 N. Xiao, J. Song, Y. Wang, C. Liu, Y. Zhou, Z. Liu, M. Li and J. Qiu, *Carbon N. Y.*, 2018, **128**, 201–204.

- 149 M. Chen, L.-L. Shao, X. Qian, T.-Z. Ren and Z.-Y. Yuan, *J. Mater. Chem. C*, 2014, **2**, 10312–10321.
- 150 M. J. Ju, I. T. Choi, M. Zhong, K. Lim, J. Ko, J. Mohin, M. Lamson, T. Kowalewski, K. Matyjaszewski and H. K. Kim, *J. Mater. Chem. A*, 2015, **3**, 4413–4419.
- 151 L. Li, H. Sui, W. Zhang, X. Li, K. Yang, A. Hagfeldt and M. Wu, *J. Mater. Chem. C*, 2016, **4**, 6778–6783.
- 152 M. H. Selamat and A. H. Ahmad, 2016, **10**, 2–4.
- 153 L.-L. Shao, M. Chen, T.-Z. Ren and Z.-Y. Yuan, *J. Power Sources*, 2015, **274**, 791–798.
- 154 S.-H. Park, H.-R. Jung, B.-K. Kim and W.-J. Lee, *J. Photochem. Photobiol. A Chem.*, 2012, **246**, 45–49.
- 155 W. Li, P. Ma, F. Chen, R. Xu, Z. Cheng, X. Yin, Y. Lin and L. Wang, *Inorg. Chem. Front.*, 2019, **6**, 2550–2557.
- 156 M. Aftabuzzaman, C. K. Kim, H. Zhou and H. K. Kim, *Nanoscale*, 2020, **12**, 1602–1616.
- 157 C. K. Kim, J. M. Ji, H. Zhou, C. Lu and H. K. Kim, *Nanomaterials*, , DOI:10.3390/nano10010029.
- 158 M. Chen, L. L. Shao, Y. Xia, Z. Y. Huang, D. L. Xu, Z. W. Zhang, Z. X. Chang and W. J. Pei, *ACS Appl. Mater. Interfaces*, 2016, **8**, 26030–26040.
- 159 W. Yang, X. Ma, X. Xu, Y. Li, S. I. Raj, G. Ning, A. Wang and S. Chen, *J. Power Sources*, 2015, **282**, 228–234.

- 160 M. J. Ju, I. T. Choi, M. Zhong, K. Lim, J. Ko, J. Mohin, M. Lamson, T. Kowalewski, K. Matyjaszewski and H. K. Kim, *J. Mater. Chem. A*, 2015, **3**, 4413–4419.
- 161 C. L. Wang, J. Y. Liao, S. H. Chung and A. Manthiram, *Adv. Energy Mater.*, 2015, **5**, 1–4.
- 162 G. Wang, J. Zhang, S. Kuang and S. Zhuo, *Mater. Sci. Semicond. Process.*, 2015, **38**, 234–239.
- 163 X. Li, R. Chen, L. Li, S. Wang, W. Zhang, K. Wu, W. Li and M. Wu, *Electrochim. Acta*, 2016, **200**, 168–173.
- 164 X. Sun, Y. Li, J. Dou, D. Shen and M. Wei, *J. Power Sources*, 2016, **322**, 93–98.
- 165 H. Jing, X. Song, S. Ren, Y. Shi, Y. An, Y. Yang, M. Feng, S. Ma and C. Hao, *Electrochim. Acta*, 2016, **213**, 252–259.
- 166 Y. Zhu, H. Guo, H. Zheng, Y. nan Lin, C. Gao, Q. Han and M. Wu, *Nano Energy*, 2016, **21**, 1–18.
- 167 S. Y. Bae, D. H. Kweon, J. Mahmood, M. J. Kim, S. Y. Yu, S. M. Jung, S. H. Shin, M. J. Ju and J. B. Baek, *Nano Energy*, 2017, **34**, 533–540.
- 168 Q. Han, H. Wang, Y. Liu, Y. Yan and M. Wu, *J. Colloid Interface Sci.*, 2017, **506**, 518–523.
- 169 N. Xiao, J. Song, Y. Wang, C. Liu, Y. Zhou, Z. Liu, M. Li and J. Qiu, *Carbon N. Y.*, 2018, **128**, 201–204.
- 170 H. Jing, Y. Shi, D. Wu, S. Liang, X. Song, Y. An and C. Hao, *Electrochim. Acta*, 2018, **281**, 646–653.

- 171 X. Meng, C. Yu, X. Zhang, L. Huang, M. Rager, J. Hong, J. Qiu and Z. Lin, *Nano Energy*, 2018, **54**, 138–147.
- 172 Y. J. Huang, Y. J. Lin, H. J. Chien, Y. F. Lin and K. C. Ho, *Nanoscale*, 2019, **11**, 12507–12516.
- 173 H. Guo, Q. Han, C. Gao, H. Zheng, Y. Zhu and M. Wu, *J. Power Sources*, 2016, **332**, 399–405.
- 174 P. Hasin, V. Amornkitbamrung and N. Chanlek, *J. Catal.*, 2017, **351**, 19–32.
- 175 H. Li, Q. Xie, J. Li, Z. Xie and H. Tang, *J. Alloys Compd.*, 2018, **742**, 641–647.
- 176 W. Wang, J. Yao, X. Zuo and G. Li, *Mater. Lett.*, 2018, **227**, 172–175.
- 177 S. Lu, S. Jin, Y. Meng, J. Chen, W. Wang, J. Yao and G. Li, *Mater. Lett.*, 2019, **250**, 84–87.
- 178 J. Yao, W. Wang, X. Zuo, Q. Yang, M. W. Khan, M. Wu, H. Tang, S. Jin and G. Li, *Appl. Catal. B Environ.*, 2019, **256**, 117857.
- 179 J. Chang, X. Song, C. Yu, H. Huang, J. Hong, Y. Ding, H. Huang, J. Yu, X. Tan, Z. Zhao and J. Qiu, *Nano Energy*, 2020, **69**, 104377.
- 180 K. S. Novoselov, S. V. Morozov, D. Jiang, Y. Zhang, S. V. Dubonos, I. V. Grigorieva, A. A. Firsov and A. K. Geim, *Science*, 2004, **306**, 666–669.
- 181 X. Du, I. Skachko, A. Barker and E. Y. Andrei, *Nat. Nanotechnol.*, 2008, **3**, 491–495.
- 182 Y. Zhu, S. Murali, W. Cai, X. Li, J. W. Suk, J. R. Potts and R. S. Ruoff, *Adv. Mater.*, 2010, **22**, 3906–3924.
- 183 A. Peigney, C. Laurent, E. Flahaut, R. R. Bacsa and A. Rousset, *Carbon N. Y.*, 2001, **39**, 507–514.

- 184 M. J. McAllister, J. L. Li, D. H. Adamson, H. C. Schniepp, A. A. Abdala, J. Liu, M. Herrera-Alonso, D. L. Milius, R. Car, R. K. Prud'homme and I. A. Aksay, *Chem. Mater.*, 2007, **19**, 4396–4404.
- 185 S. Stankovich, D. A. Dikin, G. H. B. Dommett, K. M. Kohlhaas, E. J. Zimney, E. A. Stach, R. D. Piner, S. T. Nguyen and R. S. Ruoff, *Nature*, 2006, **442**, 282–286.
- 186 C. Lee, X. Wei, J. W. Kysar and J. Hone, *Science*, 2008, **321**, 385–388.
- 187 R. R. Nair, P. Blake, A. N. Grigorenko, K. S. Novoselov, T. J. Booth, T. Stauber, N. M. R. Peres and A. K. Geim, *Science*, 2008, **320**, 1308–1308.
- 188 C. Te Hsieh, B. H. Yang and Y. F. Chen, *Diam. Relat. Mater.*, 2012, **27–28**, 68–75.
- 189 H. Kim, H. Choi, S. Hwang, Y. Kim and M. Jeon, *Nanoscale Res. Lett.*, 2012, **7**, 53.
- 190 A. Bianco, H. M. Cheng, T. Enoki, Y. Gogotsi, R. H. Hurt, N. Koratkar, T. Kyotani, M. Monthieux, C. R. Park, J. M. D. Tascon and J. Zhang, *Carbon N. Y.*, 2013, **65**, 1–6.
- 191 C. Berger, X. Wu, N. Brown, C. Naud, X. Li, Z. Song, D. Mayou, T. Li, J. Hass, A. Marchenkov, E. H. Conrad, P. N. First and W. a. De Heer, *Science*, 2006, **312**, 1191–1196.
- 192 C. Huang, C. Li and G. Shi, *Energy Environ. Sci.*, 2012, **5**, 8848–8868.
- 193 A. K. Geim and K. S. Novoselov, *Nat. Mater.*, 2007, **6**, 183–191.
- 194 Y.-Y. Li, C.-T. Li, M.-H. Yeh, K.-C. Huang, P.-W. Chen, R. Vittal and K.-C. Ho, *Electrochim. Acta*, 2015, **179**, 211–219.
- 195 S. S. Nemala, P. Kartikay, S. Prathapani, H. L. M. Bohm, P. Bhargava, S. Bohm and S. Mallick, *J. Colloid Interface Sci.*, 2017, **499**, 9–16.

- 196 W. Yang, X. Xu, Y. Gao, Z. Li, C. Li, W. Wang, Y. Chen, G. Ning, L. Zhang, F. Yang, S. Chen, A. Wang, J. Kong and Y. Li, *Nanoscale*, 2016, **8**, 13059–13066.
- 197 Y. Hernandez, V. Nicolosi, M. Lotya, F. M. Blighe, Z. Sun, S. De, I. T. McGovern, B. Holland, M. Byrne, Y. K. Gun'Ko, J. J. Boland, P. Niraj, G. Duesberg, S. Krishnamurthy, R. Goodhue, J. Hutchison, V. Scardaci, A. C. Ferrari and J. N. Coleman, *Nat. Nanotechnol.*, 2008, **3**, 563–568.
- 198 Y.-M. Lin, C. Dimitrakopoulos, K. A. Jenkins, D. B. Farmer, H.-Y. Chiu, A. Grill and P. Avouris, *Science*, 2010, **327**, 662–662.
- 199 Q. Yu, L. A. Jauregui, W. Wu, R. Colby, J. Tian, Z. Su, H. Cao, Z. Liu, D. Pandey, D. Wei, T. F. Chung, P. Peng, N. P. Guisinger, E. A. Stach, J. Bao, S.-S. Pei and Y. P. Chen, *Nat. Mater.*, 2011, **10**, 443–449.
- 200 D. C. Marcano, D. V. Kosynkin, J. M. Berlin, A. Sinitskii, Z. Sun, A. Slesarev, L. B. Alemany, W. Lu and J. M. Tour, *ACS Nano*, 2010, **4**, 4806–4814.
- 201 W. S. Hummers and R. E. Offeman, *J. Am. Chem. Soc.*, 1958, **80**, 1339.
- 202 Y. Xu, H. Bai, G. Lu, C. Li and G. Shi, *J. Am. Chem. Soc.*, 2008, **130**, 5856–5857.
- 203 C. Punckt, J. D. Roy-mayhew, D. J. Bozym, C. Punckt and I. A. Aksay, *ACS Nano*, 2010, **4**, 6203–6211.
- 204 D. Deng, X. Pan, L. Yu, Y. Cui, Y. Jiang, J. Qi, W. X. Li, Q. Fu, X. Ma, Q. Xue, G. Sun and X. Bao, *Chem. Mater.*, 2011, **23**, 1188–1193.
- 205 C. A. Tseng, C. P. Lee, Y. J. Huang, H. W. Pang, K. C. Ho and Y. T. Chen, *Mater. Today Energy*, 2018, **8**, 15–21.
- 206 C. Yu, Z. Liu, X. Meng, B. Lu, D. Cui and J. Qiu, *Nanoscale*, 2016, **8**, 17458–17464.

- 207 H. M. Kim, I.-Y. Jeon, I. T. Choi, S. H. Kang, S.-H. Shin, H. Y. Jeong, M. J. Ju, J.-B. Baek and H. K. Kim, *J. Mater. Chem. A*, 2016, **4**, 9029–9037.
- 208 W. Yang, X. Xu, L. Hou, X. Ma, F. Yang, Y. Wang and Y. Li, *J. Mater. Chem. A*, 2017, **5**, 5952–5960.
- 209 Y. C. Chang, C. A. Tseng, C. P. Lee, S. B. Ann, Y. J. Huang, K. C. Ho and Y. T. Chen, *J. Power Sources*, 2020, **449**, 227470.
- 210 D. Wu, C. Zhu, Y. Shi, H. Jing, J. Hu, X. Song, D. Si, S. Liang and C. Hao, *ACS Sustain. Chem. Eng.*, 2019, **7**, 1137–1145.
- 211 A. Rani, K. Chung, J. Kwon, S. J. Kim, Y. H. Jang, Y. J. Jang, L. N. Quan, M. Yoon, J. H. Park and D. H. Kim, *ACS Appl. Mater. Interfaces*, 2016, **8**, 11488–11498.
- 212 Z. Yu, Y. Bai, Y. Wang, Y. Liu, Y. Zhao, Y. Liu and K. Sun, *Chem. Eng. J.*, 2017, **311**, 302–309.
- 213 K. Y. Lin, M. T. Nguyen, K. Waki and J. C. Jiang, *J. Phys. Chem. C*, 2018, **122**, 26385–26392.
- 214 C. K. Kim, H. M. Kim, M. Aftabuzzaman, I. Y. Jeon, S. H. Kang, Y. K. Eom, J. B. Baek and H. K. Kim, *Mater. Today Energy*, 2018, **9**, 67–73.
- 215 M. J. Ju, J. C. Kim, H. J. Choi, I. T. Choi, S. G. Kim, K. Lim, J. Ko, J. J. Lee, I. Y. Jeon, J. B. Baek and H. K. Kim, *ACS Nano*, 2013, **7**, 5243–5250.
- 216 I.-Y. Jeon, H.-J. Choi, M. J. Ju, I. T. Choi, K. Lim, J. Ko, H. K. Kim, J. C. Kim, J.-J. Lee, D. Shin, S.-M. Jung, J.-M. Seo, M.-J. Kim, N. Park, L. Dai and J.-B. Baek, *Sci. Rep.*, 2013, **3**, 2260.

- 217 I. Y. Jeon, H. M. Kim, D. H. Kweon, S. M. Jung, J. M. Seo, S. H. Shin, I. T. Choi, Y. K. Eom, S. H. Kang, H. K. Kim, M. J. Ju and J. B. Baek, *Nano Energy*, 2016, **30**, 867–876.
- 218 M. J. Ju, I.-Y. Jeon, H. M. Kim, J. I. Choi, S.-M. Jung, J.-M. Seo, I. T. Choi, S. H. Kang, H. S. Kim, M. J. Noh, J.-J. Lee, H. Y. Jeong, H. K. Kim, Y.-H. Kim and J.-B. Baek, *Sci. Adv.*, 2016, **2**, e1501459–e1501459.
- 219 I. Y. Jeon, H. M. Kim, I. T. Choi, K. Lim, J. Ko, J. C. Kim, H. J. Choi, M. J. Ju, J. J. Lee, H. K. Kim and J. B. Baek, *Nano Energy*, 2015, **13**, 336–345.
- 220 I. Y. Jeon, M. J. Ju, J. Xu, H. J. Choi, J. M. Seo, M. J. Kim, I. T. Choi, H. M. Kim, J. C. Kim, J. J. Lee, H. K. Liu, H. K. Kim, S. Dou, L. Dai and J. B. Baek, *Adv. Funct. Mater.*, 2015, **25**, 1170–1179.
- 221 J. Xu, I. Y. Jeon, J. M. Seo, S. Dou, L. Dai and J. B. Baek, *Adv. Mater.*, 2014, **26**, 7317–7323.
- 222 M. J. Ju, I. Y. Jeon, J. C. Kim, K. Lim, H. J. Choi, S. M. Jung, I. T. Choi, Y. K. Eom, Y. J. Kwon, J. Ko, J. J. Lee, H. K. Kim and J. B. Baek, *Adv. Mater.*, 2014, **26**, 3055–3062.
- 223 M. J. Ju, I.-Y. Jeon, K. Lim, J. C. Kim, H.-J. Choi, I. T. Choi, Y. K. Eom, Y. J. Kwon, J. Ko, J.-J. Lee, J.-B. Baek and H. K. Kim, *Energy Environ. Sci.*, 2014, **7**, 1044–1052.
- 224 S. M. Jung, I. T. Choi, K. Lim, J. Ko, J. C. Kim, J. J. Lee, M. J. Ju, H. K. Kim and J. B. Baek, *Chem. Mater.*, 2014, **26**, 3586–3591.
- 225 Z. Zhao, C. Y. Lin, J. Tang and Z. Xia, *Nano Energy*, 2018, **49**, 193–199.
- 226 X. Meng, C. Yu, X. Song, Y. Liu, S. Liang, Z. Liu, C. Hao and J. Qiu, *Adv. Energy Mater.*, 2015, **5**, 1500180.

- 227 D. Pan, C. Feng, L. Wang, Y. Liu, Z. Chen, W. Shi and Z. Li, *Electrochim. Acta*, 2016, **191**, 946–953.
- 228 J. Gong, Z. Zhou, K. Sumathy, H. Yang and Q. Qiao, *J. Appl. Phys.*, 2016, **119**, 135501.
- 229 G. Wang, J. Zhang, S. Hou, W. Zhang and Z. Zhao, *Nanoscale*, 2016, **8**, 9676–9681.
- 230 W. Wei, K. Sun and Y. H. Hu, *J. Mater. Chem. A*, 2016, **4**, 12054–12057.
- 231 X. Xu, W. Yang, B. Chen, C. Zhou, X. Ma, L. Hou, Y. Tang, F. Yang, G. Ning, L. Zhang and Y. Li, *Appl. Surf. Sci.*, 2017, **405**, 308–315.
- 232 W. Wei, D. J. Stacchiola and Y. H. Hu, *Int. J. Energy Res.*, 2017, 40–42.
- 233 X. Meng, C. Yu, X. Song, Z. Liu, B. Lu, C. Hao and J. Qiu, *J. Mater. Chem. A*, 2017, **5**, 2280–2287.
- 234 S. S. Nemala, K. S. Aneja, P. Bhargava, H. L. M. Bohm, S. Mallick and S. Bohm, *Electrochim. Acta*, 2018, **285**, 86–93.
- 235 Y. C. Chang, C. A. Tseng, C. P. Lee, S. B. Ann, Y. J. Huang, K. C. Ho and Y. T. Chen, *J. Power Sources*, 2019, 227470.
- 236 B. Yang, X. Zuo, P. Chen, L. Zhou, X. Yang, H. Zhang, G. Li, M. Wu, Y. Ma, S. Jin and X. Chen, *ACS Appl. Mater. Interfaces*, 2015, **7**, 137–143.
- 237 S. Q. Guo, X. Chen, F. Z. Hu, Q. C. Zhang and L. Liu, *ACS Appl. Mater. Interfaces*, 2015, **7**, 20164–20169.
- 238 C. Zhu, H. Min, F. Xu, J. Chen, H. Dong, L. Tong, Y. Zhu and L. Sun, *RSC Adv.*, 2015, **5**, 85822–85830.

- 239 C. P. Lee, C. A. Lin, T. C. Wei, M. L. Tsai, Y. Meng, C. T. Li, K. C. Ho, C. I. Wu, S. P. Lau and J. H. He, *Nano Energy*, 2015, **18**, 109–117.
- 240 P. Y. Chen, C. T. Li, C. P. Lee, R. Vittal and K. C. Ho, *Nano Energy*, 2015, **12**, 374–385.
- 241 J. Huo, J. Wu, M. Zheng, Y. Tu and Z. Lan, *J. Power Sources*, 2015, **293**, 570–576.
- 242 H. Elbohy, A. Aboagye, S. Sigdel, Q. Wang, M. H. Sayyad, L. Zhang and Q. Qiao, *J. Mater. Chem. A*, 2015, **3**, 17721–17727.
- 243 J. Ma, W. Shen, C. Li and F. Yu, *J. Mater. Chem. A*, 2015, **3**, 12307–12313.
- 244 J. Jia, J. Wu, J. Dong and J. Lin, *Electrochim. Acta*, 2015, **185**, 184–189.
- 245 H. Ren, H. Shao, L. Zhang, D. Guo, Q. Jin, R. Yu, L. Wang, Y. Li, Y. Wang, H. Zhao and D. Wang, *Adv. Energy Mater.*, 2015, **5**, 1–6.
- 246 Z. Lan, S. Gao, J. Wu and J. Lin, *J. Appl. Polym. Sci.*, 2015, **132**, 1–5.
- 247 I.-Y. Jeon, M. J. Ju, J. Xu, H.-J. Choi, J.-M. Seo, M.-J. Kim, I. T. Choi, H. M. Kim, J. C. Kim, J.-J. Lee, H. K. Liu, H. K. Kim, S. Dou, L. Dai and J.-B. Baek, *Adv. Funct. Mater.*, 2015, **25**, 1170–1179.
- 248 M. R. Al-bahrani, W. Ahmad, H. F. Mehnane, Y. Chen, Z. Cheng and Y. Gao, *Nano-Micro Lett.*, 2015, **7**, 298–306.
- 249 X. Meng, C. Yu, B. Lu, J. Yang and J. Qiu, *Nano Energy*, 2016, **22**, 59–69.
- 250 C. Yu, H. Fang, Z. Liu, H. Hu, X. Meng and J. Qiu, *Nano Energy*, 2016, **25**, 184–192.
- 251 Z. Zhou, S. Sigdel, J. Gong, B. Vaagensmith, H. Elbohy, H. Yang, S. Krishnan, X. F. Wu and Q. Qiao, *Nano Energy*, 2016, **22**, 558–563.

- 252 X. Cui, J. Xiao, Y. Wu, P. Du, R. Si, H. Yang, H. Tian, J. Li, W. H. Zhang, D. Deng and X. Bao, *Angew. Chemie - Int. Ed.*, 2016, **55**, 6708–6712.
- 253 I. A. Sahito, K. C. Sun, A. A. Arbab, M. B. Qadir, Y. S. Choi and S. H. Jeong, *J. Power Sources*, 2016, **319**, 90–98.
- 254 C. Yu, X. Meng, X. Song, S. Liang, Q. Dong, G. Wang, C. Hao, X. Yang, T. Ma, P. M. Ajayan and J. Qiu, *Carbon N. Y.*, 2016, **100**, 474–483.
- 255 S. Li, H. Min, F. Xu, L. Tong, J. Chen, C. Zhu and L. Sun, *RSC Adv.*, 2016, **6**, 34546–34552.
- 256 W. Yang, X. Xu, Z. Li, F. Yang, L. Zhang, Y. Li, A. Wang and S. Chen, *Carbon N. Y.*, 2016, **96**, 947–954.
- 257 F. Du, X. Zuo, Q. Yang, G. Li, Z. Ding, M. Wu, Y. Ma and K. Zhu, *J. Mater. Chem. C*, 2016, **4**, 10323–10328.
- 258 B. Kilic, S. Turkdogan, O. C. Ozer, M. Asgin, O. Bayrakli, G. Surucu, A. Astam and D. Ekinici, *Mater. Lett.*, 2016, **185**, 584–587.
- 259 G. Wang, J. Zhang, S. Kuang and W. Zhang, *Chem. - A Eur. J.*, 2016, **22**, 11763–11769.
- 260 K. S. Anuratha, M. Ramaprakash, S. K. Panda and S. Mohan, *Ceram. Int.*, 2017, **43**, 10174–10182.
- 261 H. Yuan, Q. Jiao, J. Liu, X. Liu, Y. Li, D. Shi, Q. Wu, Y. Zhao and H. Li, *Carbon N. Y.*, 2017, **122**, 381–388.
- 262 T. Liu, K. Yu, L. Gao, H. Chen, N. Wang, L. Hao, T. Li, H. He and Z. Guo, *J. Mater. Chem. A*, 2017, **5**, 17848–17855.

- 263 Z. Wang, B. Lu, X. Meng, C. Zhao, L. Huang, Z. Liu, C. Yu and J. Qiu, *Electrochim. Acta*, 2017, **252**, 84–90.
- 264 V. Murugadoss, N. Wang, S. Tadakamalla, B. Wang, Z. Guo and S. Angaiah, *J. Mater. Chem. A*, 2017, **5**, 14583–14594.
- 265 C. P. Lee, K. Y. Lai, C. A. Lin, C. T. Li, K. C. Ho, C. I. Wu, S. P. Lau and J. H. He, *Nano Energy*, 2017, **36**, 260–267.
- 266 M. Batmunkh, A. Shrestha, G. Gao, L. Yu, J. Zhao, M. J. Biggs, C. J. Shearer and J. G. Shapter, *Sol. RRL*, 2017, **1**, 1700011.
- 267 G. S. Shanker, G. B. Markad, M. Jagadeeswararao, U. Bansode and A. Nag, *ACS Energy Lett.*, 2017, **2**, 2251–2256.
- 268 M. Zhang, J. Zai, J. Liu, M. Chen, Z. Wang, G. Li, X. Qian, L. Qian and X. Yu, *Dalt. Trans.*, 2017, **46**, 9511–9516.
- 269 S. Sui, Y. Liao, Y. Xie, X. Wang, L. Li, Z. Luo, W. Zhou, G. Wang, K. Pan and A. Cabot, *ChemistrySelect*, 2017, **2**, 8927–8935.
- 270 V. D. Dao, L. L. Larina, Q. C. Tran, V. T. Bui, V. T. Nguyen, T. D. Pham, I. M. A. Mohamed, N. A. M. Barakat, B. T. Huy and H. S. Choi, *Carbon N. Y.*, 2017, **116**, 294–302.
- 271 J. Yao, K. Zhang, W. Wang, X. Zuo, Q. Yang, H. Tang, M. Wu and G. Li, *ACS Appl. Mater. Interfaces*, 2018, **10**, 19564–19572.
- 272 F. Yu, Y. Shi, X. Shen, W. Yao, S. Han and J. Ma, *ACS Sustain. Chem. Eng.*, 2018, **6**, 17427–17434.

- 273 C.-H. Tsai, C.-J. Shih, Y.-R. Chou, W.-F. Chi, W.-C. Huang and Y.-H. Yu, *Org. Electron.*, 2018, **52**, 51–60.
- 274 J. Ma, S. Yuan, S. Yang, H. Lu and Y. Li, *Appl. Surf. Sci.*, 2018, **440**, 8–15.
- 275 C. H. Tsai, C. J. Shih, W. S. Wang, W. F. Chi, W. C. Huang, Y. C. Hu and Y. H. Yu, *Appl. Surf. Sci.*, 2018, **434**, 412–422.
- 276 T. Jiang, S. Yang, P. Dai, X. Yu, Z. Bai, M. Wu, G. Li and C. Tu, *Electrochim. Acta*, 2018, **261**, 143–150.
- 277 B. Zhou, X. Zhang, P. Jin, X. Li, X. Yuan, J. Wang and L. Liu, *Electrochim. Acta*, 2018, **281**, 746–752.
- 278 H. Yuan, J. Liu, H. Li, Y. Li, X. Liu, D. Shi, Q. Wu and Q. Jiao, *J. Mater. Chem. A*, 2018, **6**, 5603–5607.
- 279 R. Karthick, A. Arulraj, M. Ramesh and M. Selvaraj, *J. Colloid Interface Sci.*, 2018, **530**, 179–188.
- 280 J. Chen, D. Wu, H. Wang, F. Wang, Y. Wang, Z. Gao, F. Xu and K. Jiang, *J. Colloid Interface Sci.*, 2018, **524**, 475–482.
- 281 K. Zhang, J. Yao, X. Zuo, Q. Yang, H. Tang and G. Li, *J. Electrochem. Soc.*, 2018, **165**, H916–H926.
- 282 M. Zhou, J. He, L. Wang, S. Zhao, Q. Wang, S. Cui, X. Qin and R. Wang, *Sol. Energy*, 2018, **166**, 71–79.
- 283 X. Meng, C. Yu, X. Song, J. Iocozzia, J. Hong, M. Rager, H. Jin, S. Wang, L. Huang, J. Qiu and Z. Lin, *Angew. Chemie*, 2018, **130**, 4772–4776.

- 284 V. D. Dao, N. D. Hoa, N. H. Vu, D. V. Quang, N. Van Hieu, T. T. N. Dung, N. X. Viet, C. M. Hung and H. S. Choi, *Sol. Energy*, 2019, **191**, 420–426.
- 285 B. Tang, H. Yu, W. Huang, Y. Sun, X. Li, S. Li and T. Ma, *RSC Adv.*, 2019, **9**, 15678–15685.
- 286 F. Yu, Y. Shi, W. Yao, S. Han and J. Ma, *J. Power Sources*, 2019, **412**, 366–373.
- 287 R. Senthilkumar, M. Balu, S. Ramakrishnan, P. C. Ramamurthy, S. K. Batabyal, D. Kumaresan and N. K. Kothurkar, *J. Electroanal. Chem.*, 2019, **847**, 113236.
- 288 S. Wang, X. Wang, Y. Xie, W. Jiang, X. Wang, Y. Jiang, W. Zhou and K. Pan, *J. Alloys Compd.*, 2019, **803**, 216–223.
- 289 Y. Zhao, J. Wang, L. Zheng, P. Sun, N. Huang, X. Huang and X. Sun, *J. Nanoparticle Res.*, 2019, **21**, 123.
- 290 S. Iijima, *Lett. to Nat.*, 1991, **353**, 737–740.
- 291 J. C. Byers, A. G. Güell and P. R. Unwin, *J. Am. Chem. Soc.*, 2014, **136**, 11252–11255.
- 292 Y. Cheng, J. Zhang and S. P. Jiang, *Chem. Commun.*, 2015, **51**, 13764–13767.
- 293 K. Suzuki, M. Yamaguchi, M. Kumagai and S. Yanagida, *Chem. Lett.*, 2003, **32**, 28–29.
- 294 Y. Cheng, C. Xu, L. Jia, J. D. Gale, L. Zhang, C. Liu, P. K. Shen and S. P. Jiang, *Appl. Catal. B Environ.*, 2015, **163**, 96–104.
- 295 K. Fujisawa, K. Komiyama, H. Muramatsu, D. Shimamoto, T. Tojo, Y. A. Kim, T. Hayashi, M. Endo, K. Oshida, M. Terrones and M. S. Dresselhaus, *ACS Nano*, 2011, **5**, 7547–7554.

- 296 C. Li, E. T. Thostenson and T. W. Chou, *Appl. Phys. Lett.*, 2007, **91**, 223114.
- 297 J. Hong, C. Yu, X. Song, X. Meng, H. Huang, C. Zhao, X. Han, Z. Wang and J. Qiu, *ACS Sustain. Chem. Eng.*, 2019, **7**, 7527–7534.
- 298 M. Wasim Khan, X. Zuo, Q. Yang, H. Tang, K. M. U. Rehman, M. Wu and G. Li, *Nanoscale*, 2020, **12**, 1046–1060.
- 299 M. S. Wu and Z. Z. Ceng, *Electrochim. Acta*, 2016, **191**, 895–901.
- 300 S. Huang, S. Li, Q. He, H. An, L. Xiao and L. Hou, *Appl. Surf. Sci.*, 2019, **476**, 769–777.
- 301 M. W. Khan, J. Yao, K. Zhang, X. Zuo, Q. Yang, H. Tang, K. M. U. Rehman, H. Zhang, G. Li, S. Jin and M. Wu, *J. Electroanal. Chem.*, 2019, **844**, 142–154.
- 302 Y. Li, X. Liu, H. Li, D. Shi, Q. Jiao, Y. Zhao, C. Feng, X. Bai, H. Wang and Q. Wu, *J. Power Sources*, 2019, **422**, 122–130.
- 303 M. Chen, G. C. Wang, L. L. Shao, Z. Y. Yuan, X. Qian, Q. S. Jing, Z. Y. Huang, D. L. Xu and S. X. Yang, *ACS Appl. Mater. Interfaces*, 2018, **10**, 31208–31224.
- 304 X. Wang, Y. Xie, Y. Jiao, K. Pan, B. Bateer, J. Wu and H. Fu, *J. Mater. Chem. A*, 2019, **7**, 10405–10411.
- 305 T. Liu, X. Mai, H. Chen, J. Ren, Z. Liu, Y. Li, L. Gao, N. Wang, J. Zhang, H. He and Z. Guo, *Nanoscale*, 2018, **10**, 4194–4201.
- 306 G. Yue, W. Wu, X. Liu and H. Zheng, *Sol. Energy*, 2018, **167**, 137–146.
- 307 M. Chen, G. C. Wang, W. Q. Yang, Z. Y. Yuan, X. Qian, J. Q. Xu, Z. Y. Huang and A. X. Ding, *ACS Appl. Mater. Interfaces*, 2019, **11**, 42156–42171.

- 308 B. Peng, M. Locascio, P. Zapol, S. Li, S. L. Mielke, G. C. Schatz and H. D. Espinosa, *Nat. Nanotechnol.*, 2008, **3**, 626–631.
- 309 A. Ali, K. Shehzad, F. Ur-Rahman, S. M. Shah, M. Khurram, M. Mumtaz and R. U. R. Sagar, *ACS Appl. Mater. Interfaces*, 2016, **8**, 25353–25360.
- 310 Y. Xue, Y. Ding, J. Niu, Z. Xia, A. Roy, H. Chen, J. Qu, Z. L. Wang and L. Dai, *Sci. Adv.*, 2015, **1**, 1–10.
- 311 Z. Yang, J. Deng, X. Sun, H. Li and H. Peng, *Adv. Mater.*, 2014, **26**, 2643–2647.
- 312 F. Lodermeier, M. Prato, R. D. Costa and D. M. Guldi, *Nanoscale*, 2016, **8**, 7556–7561.
- 313 A. A. Arbab, M. H. Peerzada, I. A. Sahito and S. H. Jeong, *J. Power Sources*, 2017, **343**, 412–423.
- 314 S. G. Hashmi, G. G. Sonai, H. Iftikhar, P. D. Lund and A. F. Nogueira, *Semicond. Sci. Technol.*, 2019, **34**, 105001.
- 315 A. Monreal-Bernal, J. J. Vilatela and R. D. Costa, *Carbon N. Y.*, 2019, **141**, 488–496.
- 316 J. Ma, C. Li, F. Yu and J. Chen, *J. Power Sources*, 2015, **273**, 1048–1055.
- 317 J. Y. Lin, W. Y. Wang and S. W. Chou, *J. Power Sources*, 2015, **282**, 348–357.
- 318 M. R. Al-Bahrani, W. Ahmad, S. Sen Ruan, Z. Yang, Z. Cheng and Y. Gao, *RSC Adv.*, 2015, **5**, 95551–95557.
- 319 L. Qiu, Q. Wu, Z. Yang, X. Sun, Y. Zhang and H. Peng, *Small*, 2015, **11**, 1150–1155.
- 320 M. Raissan Al-Bahrani, L. Liu, W. Ahmad, J. Tao, F. Tu, Z. Cheng and Y. Gao, *Appl. Surf. Sci.*, 2015, **331**, 333–338.

- 321 A. A. Arbab, K. C. Sun, I. A. Sahito, M. B. Qadir and S. H. Jeong, *Appl. Surf. Sci.*, 2015, **349**, 174–183.
- 322 J. Y. Lin, A. L. Su, C. Y. Chang, K. C. Hung and T. W. Lin, *ChemElectroChem*, 2015, **2**, 720–725.
- 323 J. Zhang, M. Yu, S. Li, Y. Meng, X. Wu and J. Liu, *J. Power Sources*, 2016, **334**, 44–51.
- 324 A. A. Arbab, K. C. Sun, I. A. Sahito, M. B. Qadir, Y. S. Choi and S. H. Jeong, *ACS Appl. Mater. Interfaces*, 2016, **8**, 7471–7482.
- 325 W. Hou, Y. Xiao, G. Han and H. Zhou, *Electrochim. Acta*, 2016, **190**, 720–728.
- 326 G. Wang, S. Kuang, J. Zhang, S. Hou and S. Nian, *Electrochim. Acta*, 2016, **187**, 243–248.
- 327 H. Chen, T. Liu, J. Ren, H. He, Y. Cao, N. Wang and Z. Guo, *J. Mater. Chem. A*, 2016, **4**, 3238–3244.
- 328 Z. Yang, W. Ahmad, L. Chu, M. R. Al-Bahrani, F. Tu, Y. Wang, H. Zhang, X. Wang, J. Su, N. Liu, L. Li, C. Yang and Y. Gao, *RSC Adv.*, 2016, **6**, 55071–55078.
- 329 G. Yue, X. Liu, Y. Mao, H. Zheng and W. Zhang, *Mater. Today Energy*, 2017, **4**, 58–65.
- 330 H. Li, Y. Xiao, G. Han and M. Li, *J. Mater. Sci.*, 2017, **52**, 8421–8431.
- 331 C. H. Lin, C. H. Tsai, F. G. Tseng, C. C. M. Ma, H. C. Wu and C. K. Hsieh, *J. Alloys Compd.*, 2017, **692**, 941–949.
- 332 A. Imbrogno, R. Pandiyan, M. Barberio, A. Macario, A. Bonanno and M. A. El khakani, *Mater. Renew. Sustain. Energy*, 2017, **6**, 11.

- 333 Y. A. Leu, M. H. Yeh, L. Y. Lin, T. J. Li, L. Y. Chang, S. Y. Shen, Y. S. Li, G. L. Chen, W. H. Chiang, J. J. Lin and K. C. Ho, *ACS Sustain. Chem. Eng.*, 2017, **5**, 537–546.
- 334 A. Shrestha, M. Batmunkh, C. J. Shearer, Y. Yin, G. G. Andersson, J. G. Shapter, S. Qiao and S. Dai, *Adv. Energy Mater.*, 2017, **7**, 1602276.
- 335 M. Chen, G. Zhao, L. L. Shao, Z. Y. Yuan, Q. S. Jing, K. J. Huang, Z. Y. Huang, X. H. Zhao and G. D. Zou, *Chem. Mater.*, 2017, **29**, 9680–9694.
- 336 Z. Xie, X. Cui, W. Xu and Y. Wang, *Electrochim. Acta*, 2017, **229**, 361–370.
- 337 Y. Liu, Y. Guo, M. Li, L. Wang, B. Geng, Z. Chen, Z. Li and D. Pan, *Electrochim. Acta*, 2017, **245**, 318–326.
- 338 Y. C. Shih, H. L. Lin and K. F. Lin, *J. Electroanal. Chem.*, 2017, **794**, 112–119.
- 339 E. Demir, B. Sen and F. Sen, *Nano-Structures and Nano-Objects*, 2017, **11**, 39–45.
- 340 X. Liu, L. Gao, G. Yue, H. Zheng and W. Zhang, *Sol. Energy*, 2017, **158**, 952–959.
- 341 L. Zheng, C. Bao, S. Lei, J. Wang, F. Li, P. Sun, N. Huang, L. Fang and X. Sun, *Carbon N. Y.*, 2018, **133**, 423–434.
- 342 M. H. Yeh, Y. A. Leu, W. H. Chiang, Y. S. Li, G. L. Chen, T. J. Li, L. Y. Chang, L. Y. Lin, J. J. Lin and K. C. Ho, *J. Power Sources*, 2018, **375**, 29–36.
- 343 J. W. Chew, M. H. Khanmirzaei, A. Numan, F. S. Omar, K. Ramesh and S. Ramesh, *Mater. Sci. Semicond. Process.*, 2018, **83**, 144–149.
- 344 J. Ou, C. Gong, J. Xiang and J. Liu, *Sol. Energy*, 2018, **174**, 225–230.
- 345 T. K. Chuang, K. S. Anuratha, J. Y. Lin, K. C. Huang, C. H. Su and C. K. Hsieh, *Surf. Coatings Technol.*, 2018, **344**, 534–540.

- 346 D. J. Yun, H. Ra, J. M. Kim, J. H. Lee, S. H. Park, J. Hwang, J. G. Chung, S. H. Kim,  
Y. S. Kim, Y. J. Jeong and S. H. Lee, *Appl. Surf. Sci.*, 2019, **487**, 480–487.
- 347 W. Maiaugree, T. Tansoonton, V. Amornkitbamrung and E. Swatsitang, *Curr. Appl.  
Phys.*, 2019, **19**, 1355–1361.
- 348 U. Mehmood, W. Ahmad and S. Ahmed, *Sustain. Energy Fuels*, 2019, **3**, 3473–3480.
- 349 M. Younas, M. A. Gondal, M. A. Dastageer and K. Harrabi, *Sol. Energy*, 2019, **188**,  
1178–1188.
- 350 D. J. Yun, H. Ra, J. M. Kim, E. Oh, J. Lee, M. H. Jeong, Y. J. Jeong, H. Yang and J.  
Jang, *Org. Electron.*, 2019, **65**, 349–356.
- 351 Y. Di, Z. Xiao, Z. Zhao, G. Ru, B. Chen and J. Feng, *J. Alloys Compd.*, 2019, **788**,  
198–205.
- 352 Q. Ngo, T. Yamada, M. Suzuki, Y. Ominami, A. M. Cassell, M. Meyyappan and C. Y.  
Yang, *IEEE Trans. Nanotechnol.*, 2007, **6**, 688–695.
- 353 E. Zussman, X. Chen, W. Ding, L. Calabri, D. A. Dikin, J. P. Quintana and R. S.  
Ruoff, *Carbon N. Y.*, 2005, **43**, 2175–2185.
- 354 C. Wei and D. Srivastava, *Appl. Phys. Lett.*, 2004, **85**, 2208–2210.
- 355 P. Joshi, L. Zhang, Q. Chen, D. Galipeau, H. Fong and Q. Qiao, *ACS Appl. Mater.  
Interfaces*, 2010, **2**, 3572–3577.
- 356 D. Sebastián, V. Baglio, M. Girolamo, R. Moliner, M. J. Lázaro and A. S. Aricò, *J.  
Power Sources*, 2014, **250**, 242–249.
- 357 G. Bin Zheng, K. Kouda, H. Sano, Y. Uchiyama, Y. F. Shi and H. J. Quan, *Carbon N.  
Y.*, 2004, **42**, 635–640.

- 358 V. I. Merkulov, D. K. Hensley, M. V. Melechko, M. A. Guillorn, D. H. Lowndes and M. L. Simpson, *J. Phys. Chem. B*, 2002, **106**, 10570–10577.
- 359 Y. Zhao, Y. Liu, C. Tong, J. Ru, B. Geng, Z. Ma, H. Liu and L. Wang, *J. Mater. Sci.*, 2018, **53**, 7637–7647.
- 360 Y. H. Wang, H. Q. Fang, Q. Dong, D. H. Si, X. D. Song, C. Yu and J. S. Qiu, *RSC Adv.*, 2018, **8**, 7040–7043.
- 361 A. Yousef, R. M. Brooks, M. H. El-Newehy, S. S. Al-Deyab and H. Y. Kim, *Int. J. Hydrogen Energy*, 2017, **42**, 10407–10415.
- 362 L. Song, X. Yin, X. Xie, P. Du, J. Xiong and F. Ko, *Electrochim. Acta*, 2017, **255**, 256–265.
- 363 K. Xiong, Z. Liu, J. Yuan, K. Li, G. Li, S. Jin, C. Luo, L. Zhu, H. Shi and X. Xiao, *J. Mater. Sci. Mater. Electron.*, 2017, **28**, 1679–1683.
- 364 G. H. Kim, S. H. Park, M. S. Birajdar, J. Lee and S. C. Hong, *J. Ind. Eng. Chem.*, 2017, **52**, 211–217.
- 365 H. Guo, Y. Zhu, W. Li, H. Zheng, K. Wu, K. Ding, B. Ruan, A. Hagfeldt, T. Ma and M. Wu, *Electrochim. Acta*, 2015, **176**, 997–1000.
- 366 L. Li, X. Zhang, Z. Li, S. Liu, X. Li, Y. Zhang and W. Zhang, *Mater. Today Commun.*, 2019, **18**, 1–6.
- 367 A. Aboagye, H. Elbohy, A. D. Kelkar, Q. Qiao, J. Zai, X. Qian and L. Zhang, *Nano Energy*, 2015, **11**, 550–556.
- 368 L. Chen, Y. Zhou, H. Dai, T. Yu, J. Liu and Z. Zou, *Nano Energy*, 2015, **11**, 697–703.

- 369 L. Li, X. Zhang, D. Wang, W. Zhang, X. Li, X. Zhao, Q. Zhang, L. Gu, Z. Yu and M. Wu, *Electrochim. Acta*, 2018, **280**, 94–100.
- 370 L. Song, X. Yin, X. Xie, P. Du, J. Xiong and F. Ko, *Electrochim. Acta*, 2017, **255**, 256–265.
- 371 L. Song, T. Wang, W. Jing, X. Xie, P. Du and J. Xiong, *Mater. Res. Bull.*, 2019, **118**, 110522.
- 372 L. Chen, H. Dai, Y. Zhou, Y. Hu, T. Yu, J. Liu and Z. Zou, *Chem. Commun.*, 2014, **50**, 14321–14324.
- 373 G. Wang, S. Kuang and W. Zhang, *Mater. Lett.*, 2016, **174**, 14–16.
- 374 L. Li, J. Xiao, H. Sui, X. Yang, W. Zhang, X. Li, A. Hagfeldt and M. Wu, *J. Power Sources*, 2016, **326**, 6–13.
- 375 X. Ma, H. Elbohy, S. Sigdel, C. Lai, Q. Qiao and H. Fong, *RSC Adv.*, 2016, **6**, 11481–11487.
- 376 L. Li, M. Wang, J. Xiao, H. Sui, W. Zhang, X. Li, K. Yang, Y. Zhang and M. Wu, *Electrochim. Acta*, 2016, **219**, 350–355.
- 377 J. Xiao, M. Cui, M. Wang, H. Sui, K. Yang, L. Li, W. Zhang, X. Li, G. Fu, A. Hagfeldt and Y. Zhang, *J. Power Sources*, 2016, **328**, 543–550.
- 378 L. Li, Q. Lu, J. Xiao, J. Li, H. Mi, R. Duan, J. Li, W. Zhang, X. Li, S. Liu, K. Yang, M. Wu and Y. Zhang, *J. Power Sources*, 2017, **363**, 9–15.
- 379 J. Qiu, D. He, R. Zhao, B. Sun, H. Ji, N. Zhang, Y. Li, X. Lu and C. Wang, *J. Colloid Interface Sci.*, 2018, **522**, 95–103.

- 380 L. Li, H. Sui, K. Zhao, W. Zhang, X. Li, S. Liu, K. Yang, M. Wu and Y. Zhang, *Electrochim. Acta*, 2018, **259**, 188–195.
- 381 L. Li, Q. Lu, J. Li, X. Liu, G. Shi, F. Liu, S. Liu, W. Ding, X. Zhao and Y. Zhang, *Appl. Surf. Sci.*, 2018, **448**, 522–528.
- 382 L. Li, X. Wang, Z. Ma, L. Liu, H. Wang, W. Zhang and X. Li, *Appl. Surf. Sci.*, 2019, **475**, 109–116.
- 383 L. Li, X. Zhang, L. Fu, Q. Wang, S. Ji, M. Wu, H. Wang and W. Zhang, *Compos. Part B Eng.*, 2019, **173**, 107026.
- 384 K. Zhao, X. Zhang, M. Wang, W. Zhang, X. Li, H. Wang and L. Li, *J. Alloys Compd.*, 2019, **786**, 50–55.
- 385 M. A. Green, E. D. Dunlop, D. H. Levi, J. Hohl-Ebinger, M. Yoshita and A. W. Y. Ho-Baillie, *Prog. Photovoltaics Res. Appl.*, 2019, **27**, 565–575.
- 386 M. M. Lee, J. Teuscher, T. Miyasaka, T. N. Murakami and H. J. Snaith, *Science*, 2012, **338**, 643–647.
- 387 J. S. Manser, M. I. Saidaminov, J. A. Christians, O. M. Bakr and P. V Kamat, *Acc. Chem. Res.*, 2016, **49**, 330–338.
- 388 J.-H. Im, I.-H. Jang, N. Pellet, M. Grätzel and N.-G. Park, *Nat Nano*, 2014, **9**, 927–932.
- 389 S. Y. Sun, T. Salim, N. Mathews, M. Duchamp, C. Boothroyd, G. C. Xing, T. C. Sum and Y. M. Lam, *Energy Environ. Sci.*, 2014, **7**, 399–407.
- 390 C. Wehrenfennig, G. E. Eperon, M. B. Johnston, H. J. Snaith and L. M. Herz, *Adv. Mater.*, 2014, **26**, 1584–1589.

- 391 G. Xing, N. Mathews, S. Sun, S. S. Lim, Y. M. Lam, M. Grätzel, S. Mhaisalkar and T. C. Sum, *Science*, 2013, **342**, 344–347.
- 392 S. D. Stranks, G. E. Eperon, G. Grancini, C. Menelaou, M. J. P. Alcocer, T. Leijtens, L. M. Herz, A. Petrozza and H. J. Snaith, *Science*, 2013, **342**, 341–344.
- 393 V. D’Innocenzo, G. Grancini, M. J. P. Alcocer, A. R. S. Kandada, S. D. Stranks, M. M. Lee, G. Lanzani, H. J. Snaith and A. Petrozza, *Nat. Commun.*, 2014, **5**, 3586.
- 394 A. Guerrero, J. You, C. Aranda, Y. S. Kang, G. Garcia-Belmonte, H. Zhou, J. Bisquert and Y. Yang, *ACS Nano*, 2016, **10**, 218–224.
- 395 T. Leijtens, G. E. Eperon, S. Pathak, A. Abate, M. M. Lee and H. J. Snaith, *Nat. Commun.*, 2013, **4**, 2885.
- 396 C. Besleaga, L. E. Abramiuc, V. Stancu, A. G. Tomulescu, M. Sima, L. Trinca, N. Plugaru, L. Pintilie, G. A. Nemnes, M. Iliescu, H. G. Svavarsson, A. Manolescu and I. Pintilie, *J. Phys. Chem. Lett.*, 2016, **7**, 5168–5175.
- 397 K. Domanski, J.-P. Correa-Baena, N. Mine, M. K. Nazeeruddin, A. Abate, M. Saliba, W. Tress, A. Hagfeldt and M. Grätzel, *ACS Nano*, 2016, **10**, 6306–6314.
- 398 N. N. Shlenskaya, N. A. Belich, M. Grätzel, E. A. Goodilin and A. B. Tarasov, *J. Mater. Chem. A*, 2018, **6**, 1780–1786.
- 399 S. Cacovich, L. Ciná, F. Matteocci, G. Divitini, P. A. Midgley, A. Di Carlo and C. Ducati, *Nanoscale*, 2017, **9**, 4700–4706.
- 400 L. Zhao, R. A. Kerner, Z. Xiao, Y. L. Lin, K. M. Lee, J. Schwartz and B. P. Rand, *ACS Energy Lett.*, 2016, **1**, 595–602.
- 401 Y. Rong, L. Liu, A. Mei, X. Li and H. Han, *Adv. Energy Mater.*, 2015, **5**, 1501066.

- 402 R. L. McCreery, *Chem. Rev.*, 2008, **108**, 2646–2687.
- 403 Y. Cai, L. Liang and P. Gao, *Chinese Phys. B*, 2018, **27**, 18805.
- 404 Y. Rong, Z. Ku, A. Mei, T. Liu, M. Xu, S. Ko, X. Li and H. Han, *J. Phys. Chem. Lett.*, 2014, **5**, 2160–2164.
- 405 T. Liu, L. Liu, M. Hu, Y. Yang, L. Zhang, A. Mei and H. Han, *J. Power Sources*, 2015, **293**, 533–538.
- 406 Z.-L. Yang, Z.-Y. Zhang, W.-L. Fan, C. Hu, L. Zhang and J.-J. Qi, *Sol. Energy*, 2019, **193**, 859–865.
- 407 H. Liu, B. Yang, H. Chen, K. Li, G. Liu, Y. Yuan, Y. Gao and C. Zhou, *Org. Electron.*, 2018, **58**, 69–74.
- 408 M. Hu, L. Liu, A. Mei, Y. Yang, T. Liu and H. Han, *J. Mater. Chem. A*, 2014, **2**, 17115–17121.
- 409 Z. Ku, Y. Rong, M. Xu, T. Liu and H. Han, *Sci. Rep.*, 2013, **3**, 3132.
- 410 K. Cao, Z. Zuo, J. Cui, Y. Shen, T. Moehl, S. M. Zakeeruddin, M. Grätzel and M. Wang, *Nano Energy*, 2015, **17**, 171–179.
- 411 A. Mei, X. Li, L. Liu, Z. Ku, T. Liu, Y. Rong, M. Xu, M. Hu, J. Chen, Y. Yang, M. Grätzel and H. Han, *Science*, 2014, **345**, 295–298.
- 412 L. Xu, F. Wan, Y. Rong, H. Chen, S. He, X. Xu, G. Liu, H. Han, Y. Yuan, J. Yang, Y. Gao, B. Yang and C. Zhou, *Org. Electron.*, 2017, **45**, 131–138.
- 413 Y. Hu, Z. Zhang, A. Mei, Y. Jiang, X. Hou, Q. Wang, K. Du, Y. Rong, Y. Zhou, G. Xu and H. Han, *Adv. Mater.*, 2018, **30**, 1705786.

- 414 L. Zhang, T. Liu, L. Liu, M. Hu, Y. Yang, A. Mei and H. Han, *J. Mater. Chem. A*, 2015, **3**, 9165–9170.
- 415 P. Jiang, T. W. Jones, N. W. Duffy, K. F. Anderson, R. Bennett, M. Grigore, P. Marvig, Y. Xiong, T. Liu, Y. Sheng, L. Hong, X. Hou, M. Duan, Y. Hu, Y. Rong, G. J. Wilson and H. Han, *Carbon N. Y.*, 2018, **129**, 830–836.
- 416 D. L. Carroll, P. Redlich, X. Blase, J. C. Charlier, S. Curran, P. M. Ajayan, S. Roth and M. Rühle, *Phys. Rev. Lett.*, 1998, **81**, 2332–2335.
- 417 Y. A. Kim, K. Fujisawa, H. Muramatsu, T. Hayashi, M. Endo, T. Fujimori, K. Kaneko, M. Terrones, J. Behrends, A. Eckmann, C. Casiraghi, K. S. Novoselov, R. Saito and M. S. Dresselhaus, *ACS Nano*, 2012, **6**, 6293–6300.
- 418 L. S. Panchakarla, K. S. Subrahmanyam, S. K. Saha, A. Govindaraj, H. R. Krishnamurthy, U. V Waghmare and C. N. R. Rao, *Adv. Mater.*, 2009, **21**, 4726–4730.
- 419 P. Jiang, Y. Xiong, M. Xu, A. Mei, Y. Sheng, L. Hong, T. W. Jones, G. J. Wilson, S. Xiong, D. Li, Y. Hu, Y. Rong and H. Han, *J. Phys. Chem. C*, 2018, **122**, 16481–16487.
- 420 M. Duan, C. Tian, Y. Hu, A. Mei, Y. Rong, Y. Xiong, M. Xu, Y. Sheng, P. Jiang, X. Hou, X. Zhu, F. Qin and H. Han, *ACS Appl. Mater. Interfaces*, 2017, **9**, 31721–31727.
- 421 M. Chen, R.-H. Zha, Z.-Y. Yuan, Q.-S. Jing, Z.-Y. Huang, X.-K. Yang, S.-M. Yang, X.-H. Zhao, D.-L. Xu and G.-D. Zou, *Chem. Eng. J.*, 2017, **313**, 791–800.
- 422 C. Tian, A. Mei, S. Zhang, H. Tian, S. Liu, F. Qin, Y. Xiong, Y. Rong, Y. Hu, Y. Zhou, S. Xie and H. Han, *Nano Energy*, 2018, **53**, 160–167.
- 423 T. Liu, Y. Rong, Y. Xiong, A. Mei, Y. Hu, Y. Sheng, P. Jiang, X. Hou, M. Duan, Y. Guan, L. Hong and H. Han, *RSC Adv.*, 2017, **7**, 10118–10123.

- 424 Z. Meng, D. Guo and K. Fan, *Appl. Surf. Sci.*, 2018, **430**, 632–638.
- 425 T. Liu, Y. Xiong, A. Mei, Y. Hu, Y. Rong, M. Xu, Z. Wang, L. Lou, D. Du, S. Zheng, X. Long, S. Xiao, S. Yang and H. Han, *RSC Adv.*, 2019, **9**, 29840–29846.
- 426 S. Bhandari, A. Roy, A. Ghosh, T. K. Mallick and S. Sundaram, *ACS Omega*, 2020, **5**, 422–429.
- 427 L. Zhou, Y. Zuo, T. K. Mallick and S. Sundaram, *Sci. Rep.*, 2019, **9**, 8778.
- 428 S. Guarnera, A. Abate, W. Zhang, J. M. Foster, G. Richardson, A. Petrozza and H. J. Snaith, *J. Phys. Chem. Lett.*, 2015, **6**, 432–437.
- 429 Y. Yang, H. Chen, X. Zheng, X. Meng, T. Zhang, C. Hu, Y. Bai, S. Xiao and S. Yang, *Nano Energy*, 2017, **42**, 322–333.
- 430 G. S. Han, H. S. Chung, B. J. Kim, D. H. Kim, J. W. Lee, B. S. Swain, K. Mahmood, J. S. Yoo, N.-G. Park, J. H. Lee and H. S. Jung, *J. Mater. Chem. A*, 2015, **3**, 9160–9164.
- 431 Y. H. Lee, J. Luo, M.-K. Son, P. Gao, K. T. Cho, J. Seo, S. M. Zakeeruddin, M. Grätzel and M. K. Nazeeruddin, *Adv. Mater.*, 2016, **28**, 3966–3972.
- 432 J. M. Marin-Beloqui, L. Lanzetta and E. Palomares, *Chem. Mater.*, 2016, **28**, 207–213.
- 433 S. F. Shaikh, H.-C. Kwon, W. Yang, H. Hwang, H. Lee, E. Lee, S. Ma and J. Moon, *J. Mater. Chem. A*, 2016, **4**, 15478–15485.
- 434 Y. Xiong, X. Zhu, A. Mei, F. Qin, S. Liu, S. Zhang, Y. Jiang, Y. Zhou and H. Han, *Sol. RRL*, 2018, **2**, 1800002.
- 435 Q. Wang, S. Liu, Y. Ming, Y. Guan, D. Li, C. Zhang, Z. Wang, Y. Rong, Y. Hu and H. Han, *Sustain. Energy Fuels*, 2018, **2**, 2412–2418.

- 436 J. Chen, Y. Rong, A. Mei, Y. Xiong, T. Liu, Y. Sheng, P. Jiang, L. Hong, Y. Guan, X. Zhu, X. Hou, M. Duan, J. Zhao, X. Li and H. Han, *Adv. Energy Mater.*, 2016, **6**, 1502009.
- 437 S. Liu, W. Huang, P. Liao, N. Pootrakulchote, H. Li, J. Lu, J. Li, F. Huang, X. Shai, X. Zhao, Y. Shen, Y.-B. Cheng and M. Wang, *J. Mater. Chem. A*, 2017, **5**, 22952–22958.
- 438 P. Zhang, G. Kapil, K. Hamada, S. S. Pandey, T. Ma and S. Hayase, *ACS Sustain. Chem. Eng.*, 2018, **6**, 10221–10228.
- 439 J. Chen, Y. Xiong, Y. Rong, A. Mei, Y. Sheng, P. Jiang, Y. Hu, X. Li and H. Han, *Nano Energy*, 2016, **27**, 130–137.
- 440 X. Hou, Y. Hu, H. Liu, A. Mei, X. Li, M. Duan, G. Zhang, Y. Rong and H. Han, *J. Mater. Chem. A*, 2017, **5**, 73–78.
- 441 A. M. A. Leguy, Y. Hu, M. Campoy-Quiles, M. I. Alonso, O. J. Weber, P. Azarhoosh, M. van Schilfgaarde, M. T. Weller, T. Bein, J. Nelson, P. Docampo and P. R. F. Barnes, *Chem. Mater.*, 2015, **27**, 3397–3407.
- 442 R. J. Sutton, G. E. Eperon, L. Miranda, E. S. Parrott, B. A. Kamino, J. B. Patel, M. T. Hörantner, M. B. Johnston, A. A. Haghighirad, D. T. Moore and H. J. Snaith, *Adv. Energy Mater.*, 2016, **6**, 1502458.
- 443 B. Conings, J. Drijkoningen, N. Gauquelin, A. Babayigit, J. D’Haen, L. D’Olieslaeger, A. Ethirajan, J. Verbeeck, J. Manca, E. Mosconi, F. De Angelis and H.-G. Boyen, *Adv. Energy Mater.*, 2015, **5**, 1500477.
- 444 N. H. Tiep, Z. Ku and H. J. Fan, *Adv. Energy Mater.*, 2016, **6**, 1501420.
- 445 C. Lu, M. Paramasivam, K. Park, C. H. Kim and H. K. Kim, *ACS Appl. Mater. Interfaces*, 2019, **11**, 14011–14022.

- 446 Y. Rong, X. Hou, Y. Hu, A. Mei, L. Liu, P. Wang and H. Han, *Nat. Commun.*, 2017, **8**, 14555.
- 447 S. Liu, S. Li, J. Wu, Q. Wang, Y. Ming, D. Zhang, Y. Sheng, Y. Hu, Y. Rong, A. Mei and H. Han, *J. Phys. Chem. Lett.*, 2019, **10**, 6865–6872.
- 448 A. Mei, X. Li, L. Liu, Z. Ku, T. Liu, Y. Rong, M. Xu, M. Hu, J. Chen, Y. Yang, M. Grätzel and H. Han, *Science*, 2014, **345**, 295–8.
- 449 X. Jiang, Y. Xiong, Z. Zhang, Y. Rong, A. Mei, C. Tian, J. Zhang, Y. Zhang, Y. Jin, H. Han and Q. Liu, *Electrochim. Acta*, 2018, **263**, 134–139.
- 450 H. Zhou, Y. Shi, Q. Dong, H. Zhang, Y. Xing, K. Wang, Y. Du and T. Ma, *J. Phys. Chem. Lett.*, 2014, **5**, 3241–3246.
- 451 Y. Yang, J. Xiao, H. Wei, L. Zhu, D. Li, Y. Luo, H. Wu and Q. Meng, *RSC Adv.*, 2014, **4**, 52825–52830.
- 452 S. Gholipour, J.-P. Correa-Baena, K. Domanski, T. Matsui, L. Steier, F. Giordano, F. Tajabadi, W. Tress, M. Saliba, A. Abate, A. Morteza Ali, N. Taghavinia, M. Grätzel and A. Hagfeldt, *Adv. Energy Mater.*, 2016, **6**, 1601116.
- 453 L. Gao, Y. Zhou, F. Meng, Y. Li, A. Liu, Y. Li, C. Zhang, M. Fan, G. Wei and T. Ma, *Carbon N. Y.*, 2020, **162**, 267–272.
- 454 Q.-Q. Chu, B. Ding, Q. Qiu, Y. Liu, C.-X. Li, C.-J. Li, G.-J. Yang and B. Fang, *J. Mater. Chem. A*, 2018, **6**, 8271–8279.
- 455 Q.-Q. Chu, B. Ding, Y. Li, L. Gao, Q. Qiu, C.-X. Li, C.-J. Li, G.-J. Yang and B. Fang, *ACS Sustain. Chem. Eng.*, 2017, **5**, 9758–9765.

- 456 H. Wei, J. Xiao, Y. Yang, S. Lv, J. Shi, X. Xu, J. Dong, Y. Luo, D. Li and Q. Meng, *Carbon N. Y.*, 2015, **93**, 861–868.
- 457 S. He, L. Qiu, D.-Y. Son, Z. Liu, E. J. Juarez-Perez, L. K. Ono, C. Stecker and Y. Qi, *ACS Energy Lett.*, 2019, **4**, 2032–2039.
- 458 H. Ye, Z. Liu, X. Liu, B. Sun, X. Tan, Y. Tu, T. Shi, Z. Tang and G. Liao, *Appl. Surf. Sci.*, 2019, **478**, 417–425.
- 459 Y. Lv, Y. Jin, W. Cai, Z. Zhang, X. Zhou and H. Chen, *J. Alloys Compd.*, 2020, **821**, 153272.
- 460 N. Arora, M. I. Dar, S. Akin, R. Uchida, T. Baumeler, Y. Liu, S. M. Zakeeruddin and M. Grätzel, *Small*, 2019, **15**, 1904746.
- 461 A. K. Baranwal, H. Kanda, N. Shibayama and S. Ito, *Sustain. Energy Fuels*, 2018, **2**, 2778–2787.
- 462 F. Zhang, X. Yang, M. Cheng, W. Wang and L. Sun, *Nano Energy*, 2016, **20**, 108–116.
- 463 X. Jiang, Z. Yu, H.-B. Li, Y. Zhao, J. Qu, J. Lai, W. Ma, D. Wang, X. Yang and L. Sun, *J. Mater. Chem. A*, 2017, **5**, 17862–17866.
- 464 F. Zhang, X. Yang, M. Cheng, J. Li, W. Wang, H. Wang and L. Sun, *J. Mater. Chem. A*, 2015, **3**, 24272–24280.
- 465 L. Chu, W. Liu, Z. Qin, R. Zhang, R. Hu, J. Yang, J. Yang and X. Li, *Sol. Energy Mater. Sol. Cells*, 2018, **178**, 164–169.
- 466 H. Chen, Z. Wei, H. He, X. Zheng, K. S. Wong and S. Yang, *Adv. Energy Mater.*, 2016, **6**, 1502087.

- 467 X. Chang, W. Li, H. Chen, L. Zhu, H. Liu, H. Geng, S. Xiang, J. Liu, X. Zheng, Y. Yang and S. Yang, *ACS Appl. Mater. Interfaces*, 2016, **8**, 30184–30192.
- 468 F. Zhang, X. Yang, H. Wang, M. Cheng, J. Zhao and L. Sun, *ACS Appl. Mater. Interfaces*, 2014, **6**, 16140–16146.
- 469 Y. Xiao, N. Cheng, K. K. Kondamareddy, C. Wang, P. Liu, S. Guo and X.-Z. Zhao, *J. Power Sources*, 2017, **342**, 489–494.
- 470 X. Liu, Z. Liu, B. Sun, X. Tan, H. Ye, Y. Tu, T. Shi, Z. Tang and G. Liao, *Nano Energy*, 2018, **50**, 201–211.
- 471 J. Liu, L. Zhu, S. Xiang, H. Wang, H. Liu, W. Li and H. Chen, *ACS Sustain. Chem. Eng.*, 2019, **7**, 16927–16932.
- 472 H. Hu, B. Dong, H. Hu, F. Chen, M. Kong, Q. Zhang, T. Luo, L. Zhao, Z. Guo, J. Li, Z. Xu, S. Wang, D. Eder and L. Wan, *ACS Appl. Mater. Interfaces*, 2016, **8**, 17999–18007.
- 473 Y. Xiao, C. Wang, K. K. Kondamareddy, N. Cheng, P. Liu, Y. Qiu, F. Qi, S. Kong, W. Liu and X.-Z. Zhao, *ACS Appl. Energy Mater.*, 2018, **1**, 5453–5462.
- 474 W. Liu, L. Chu, R. Hu, R. Zhang, Y. Ma, Y. Pu, J. Zhang, J. Yang, X. Li and W. Huang, *Sol. Energy*, 2018, **166**, 42–49.
- 475 Z. Liu, S. Bi, G. Hou, C. Ying and X. Su, *J. Power Sources*, 2019, **430**, 12–19.
- 476 B. Zhang, B. Zhang, S. Wang, S. Yao, H. Bala, G. Sun, J. Cao and Z. Zhang, *Electrochim. Acta*, 2020, **338**, 135884.
- 477 W. Fan, Z. Wei, Z. Zhang, F. Qiu, C. Hu, Z. Li, M. Xu and J. Qi, *Inorg. Chem. Front.*, 2019, **6**, 2767–2775.

- 478 C. Zhang, Q. Luo, X. Deng, J. Zheng, W. Ou-Yang, X. Chen and S. Huang, *Electrochim. Acta*, 2017, **258**, 1262–1272.
- 479 Z. Liu, B. Sun, X. Liu, J. Han, H. Ye, Y. Tu, C. Chen, T. Shi, Z. Tang and G. Liao, *J. Mater. Chem. A*, 2018, **6**, 7409–7419.
- 480 X. Guo, H. Dong, W. Li, N. Li and L. Wang, *ChemPhysChem*, 2015, **16**, 1727–1732.
- 481 S. Lin, B. Yang, X. Qiu, J. Yan, J. Shi, Y. Yuan, W. Tan, X. Liu, H. Huang, Y. Gao and C. Zhou, *Org. Electron.*, 2018, **53**, 235–241.
- 482 X. Wu, L. Xie, K. Lin, J. Lu, K. Wang, W. Feng, B. Fan, P. Yin and Z. Wei, *J. Mater. Chem. A*, 2019, **7**, 12236–12243.
- 483 G. D. M. R. Dabera, K. D. G. I. Jayawardena, M. R. R. Prabhath, I. Yahya, Y. Y. Tan, N. A. Nismy, H. Shiozawa, M. Sauer, G. Ruiz-Soria, P. Ayala, V. Stolojan, A. A. D. T. Adikaari, P. D. Jarowski, T. Pichler and S. R. P. Silva, *ACS Nano*, 2013, **7**, 556–565.
- 484 Y. Jung, X. Li, N. K. Rajan, A. D. Taylor and M. A. Reed, *Nano Lett.*, 2013, **13**, 95–99.
- 485 P. G. Collins, K. Bradley, M. Ishigami and A. Zettl, *Science*, 2000, **287**, 1801–1804.
- 486 P. Liu, Q. Sun, F. Zhu, K. Liu, K. Jiang, L. Liu, Q. Li and S. Fan, *Nano Lett.*, 2008, **8**, 647–651.
- 487 J. Ryu, K. Lee, J. Yun, H. Yu, J. Lee and J. Jang, *Small*, 2017, **13**, 1701225.
- 488 Y. Wang, H. Zhao, Y. Mei, H. Liu, S. Wang and X. Li, *ACS Appl. Mater. Interfaces*, 2019, **11**, 916–923.

- 489 H. Li, K. Cao, J. Cui, S. Liu, X. Qiao, Y. Shen and M. Wang, *Nanoscale*, 2016, **8**, 6379–6385.
- 490 Z. Li, S. A. Kulkarni, P. P. Boix, E. Shi, A. Cao, K. Fu, S. K. Batabyal, J. Zhang, Q. Xiong, L. H. Wong, N. Mathews and S. G. Mhaisalkar, *ACS Nano*, 2014, **8**, 6797–6804.
- 491 Z. Wei, H. Chen, K. Yan, X. Zheng and S. Yang, *J. Mater. Chem. A*, 2015, **3**, 24226–24231.
- 492 X. Zheng, H. Chen, Q. Li, Y. Yang, Z. Wei, Y. Bai, Y. Qiu, D. Zhou, K. S. Wong and S. Yang, *Nano Lett.*, 2017, **17**, 2496–2505.
- 493 K. Aitola, K. Sveinbjörnsson, J.-P. Correa-Baena, A. Kaskela, A. Abate, Y. Tian, E. M. J. Johansson, M. Grätzel, E. I. Kauppinen, A. Hagfeldt and G. Boschloo, *Energy Environ. Sci.*, 2016, **9**, 461–466.
- 494 N. Ahn, I. Jeon, J. Yoon, E. I. Kauppinen, Y. Matsuo, S. Maruyama and M. Choi, *J. Mater. Chem. A*, 2018, **6**, 1382–1389.
- 495 Q. Luo, H. Ma, Q. Hou, Y. Li, J. Ren, X. Dai, Z. Yao, Y. Zhou, L. Xiang, H. Du, H. He, N. Wang, K. Jiang, H. Lin, H. Zhang and Z. Guo, *Adv. Funct. Mater.*, 2018, **28**, 1706777.
- 496 Y. Yang, Z. Liu, W. K. Ng, L. Zhang, H. Zhang, X. Meng, Y. Bai, S. Xiao, T. Zhang, C. Hu, K. S. Wong and S. Yang, *Adv. Funct. Mater.*, 2019, **29**, 1806506.
- 497 X. Zheng, H. Chen, Z. Wei, Y. Yang, H. Lin and S. Yang, *Front. Optoelectron.*, 2016, **9**, 71–80.
- 498 Q. Luo, H. Ma, Y. Zhang, X. Yin, Z. Yao, N. Wang, J. Li, S. Fan, K. Jiang and H. Lin, *J. Mater. Chem. A*, 2016, **4**, 5569–5577.

- 499 P. You, Z. Liu, Q. Tai, S. Liu and F. Yan, *Adv. Mater.*, 2015, **27**, 3632–3638.
- 500 F. Lang, M. A. Gluba, S. Albrecht, J. Rappich, L. Korte, B. Rech and N. H. Nickel, *J. Phys. Chem. Lett.*, 2015, **6**, 2745–2750.
- 501 Y. Zhu, S. Jia, J. Zheng, Y. Lin, Y. Wu and J. Wang, *J. Mater. Chem. C*, 2018, **6**, 3097–3103.
- 502 K. Yan, Z. Wei, J. Li, H. Chen, Y. Yi, X. Zheng, X. Long, Z. Wang, J. Wang, J. Xu and S. Yang, *Small*, 2015, **11**, 2269–2274.
- 503 W. Wei, B. Hu, F. Jin, Z. Jing, Y. Li, A. A. García Blanco, D. J. Stacchiola and Y. H. Hu, *J. Mater. Chem. A*, 2017, **5**, 7749–7752.
- 504 C. Zhang, S. Wang, H. Zhang, Y. Feng, W. Tian, Y. Yan, J. Bian, Y. Wang, S. Jin, S. M. Zakeeruddin, M. Grätzel and Y. Shi, *Energy Environ. Sci.*, 2019, **12**, 3585–3594.
- 505 S. Mathew, A. Yella, P. Gao, R. Humphry-Baker, B. F. E. Curchod, N. Ashari-Astani, I. Tavernelli, U. Rothlisberger, M. K. Nazeeruddin and M. Grätzel, *Nat. Chem.*, 2014, **6**, 242–247.
- 506 K. Kakiage, Y. Aoyama, T. Yano, K. Oya, J. I. Fujisawa and M. Hanaya, *Chem. Commun.*, 2015, **51**, 15894–15897.
